# Supplementary material for: Two Main Biosynthesis Pathways Involved in the Synthesis of the Floral Aroma of the Nacional Cocoa Variety
Source: Front Plant Sci. 2021 Sep 24;12:681979. doi: 10.3389/fpls.2021.681979 (PMC8498224; doi:10.3389/fpls.2021.681979)
Supplement: Supplementary file 1 [file Table_1.XLSX]

## Sheet: Feuil1
Trait
Floral-Woodsy
Floral-Grassy (greengrass)
Floral-Green vegetative
Floral-Earthy
Floral-Herbal
Floral-Mushrooms
Floral-Orange blossom
Floral-Flowers
Floral-Perfume
Floral-Barkwoody
Floral-Lightwood
Floral-Darkwood
Floral-Woodresin
Floral-Tobacco
Floral-Peppery
Floral-Other spice
