# Supplementary material for: Two Main Biosynthesis Pathways Involved in the Synthesis of the Floral Aroma of the Nacional Cocoa Variety
Source: Front Plant Sci. 2021 Sep 24;12:681979. doi: 10.3389/fpls.2021.681979 (PMC8498224; doi:10.3389/fpls.2021.681979)
Supplement: Supplementary file 2 [file Table_2.XLSX]

## Sheet: Feuil1
Chromosome	Number of haplotypic bloc	Methode	Markers Sorting	Markers type	Traits	Position of the association peak (bp)	p-value	Explanation rate of the character	Treatment of beans	Haploview marker number	Number of associated markers in the same area	Start position of the association	Position of the end of the association
9	5	GLM	MAF5	SNP	2-ethylhexan-1-ol_R	1099704	2.61e-08	0.287559	R	43	2	1088620	1099704
3	NA	GLM	MAF5	SNP	2-ethylhexan-1-ol_R	35461657	6.89e-07	0.240797	R	736	1	35461657	35461657
3	NA	GLM	MAF5	SNP	2-ethylhexan-1-ol_R	35438558	7e-07	0.240581	R	733	1	35438558	35438558
9	NA	GLM	NA	SSR	2-ethylhexan-1-ol_R	1487433	3.16e-06	0.177023	R	SSR	1	1487433	1487433
9	6	GLM	MAF5	SNP	2-ethylhexan-1-ol_R	1123632	3.47e-06	0.216613	R	45	1	1109358	1233013
9	5	MLM	MAF5	SNP	2-ethylhexan-1-ol_R	1099704	4.81e-06	0.21707	R	43	1	1088620	1099704
3	74	GLM	MAF5	SNP	2-ethylhexan-1-ol_R	36234590	6.63e-06	0.206694	R	772	4	35942553	36345866
9	34	GLM	G7	SNP	2-ethylhexan-1-ol_R	25799049	1.2e-05	0.19755	R	438	1	24510857	26940576
9	34	GLM	MAF5	SNP	2-ethylhexan-1-ol_R	25799049	1.2e-05	0.19755	R	438	1	24510857	26940576
9	10	GLM	NA	SSR	2-ethylhexan-1-ol_R	1704971	0.000262	0.122709	R	SSR	1	1537448	2208503
4	NA	GLM	MAF5	SNP	2-Phenylethanol_UR	17349904	9.89e-07	0.176269	UR	231	1	17349904	17349904
7	21	MLM	MAF5	SNP	2-Phenylethanol_UR	4831886	1.89e-06	0.190985	UR	199	1	4824487	4831886
7	21	GLM	MAF5	SNP	2-Phenylethanol_UR	4831886	1.98e-06	0.192288	UR	199	1	4824487	4831886
8	40	GLM	G7	SNP	2-Phenylethanol_UR	17276956	1.98e-06	0.192267	UR	439	2	17276956	17276981
8	40	GLM	MAF5	SNP	2-Phenylethanol_UR	17276956	1.98e-06	0.192267	UR	439	2	17276956	17276981
7	NA	GLM	MAF5	SNP	2-Phenylethanol_UR	5316380	2.09e-06	0.191594	UR	210	1	5316380	5316380
5	64	GLM	MAF5	SNP	2-Phenylethanol_UR	33303465	3.56e-06	0.184532	UR	592	1	32660102	33718239
8	NA	GLM	G7	SNP	2-Phenylethanol_UR	17113165	3.68e-06	0.184084	UR	435	1	17113165	17113165
8	NA	GLM	MAF5	SNP	2-Phenylethanol_UR	17113165	3.68e-06	0.184084	UR	435	1	17113165	17113165
2	NA	GLM	NA	SSR	2-Phenylethanol_UR	11231613	3.84e-06	0.254243	UR	SSR	1	11231613	11231613
7	NA	MLM	MAF5	SNP	2-Phenylethanol_UR	5316380	3.84e-06	0.181988	UR	210	1	5316380	5316380
2	56	GLM	MAF5	SNP	2-Phenylethanol_UR	25549521	6.06e-06	0.177444	UR	539	1	23909636	27037630
8	41	GLM	G7	SNP	2-Phenylethanol_UR	17506977	1.01e-05	0.170634	UR	442	1	17506977	17644612
8	41	GLM	MAF5	SNP	2-Phenylethanol_UR	17506977	1.01e-05	0.170634	UR	442	1	17506977	17644612
5	64	MLM	MAF5	SNP	2-Phenylethanol_UR	33303465	1.07e-05	0.167002	UR	592	1	32660102	33718239
8	NA	GLM	G7	SNP	2-Phenylethanol_UR	16952262	1.36e-05	0.166526	UR	433	1	16952262	16952262
8	NA	GLM	MAF5	SNP	2-Phenylethanol_UR	16952262	1.36e-05	0.166526	UR	433	1	16952262	16952262
4	40	MLM	G7	SNP	2-phenylethanol_R	23646147	2.12e-06	0.156923	R	NA	2	23463681	23682721
1	NA	GLM	MAF5	SNP	2-phenylethanol_R	33039561	4.69e-06	0.180876	R	696	1	33039561	33039561
10	2	GLM	NA	SSR	2-phenylethanol_R	323778	0.000193	0.143411	R	SSR	1	290733	456792
5	53	GLM	G7	SNP	2-phenylethyl acetate_UR	29926884	6.92e-06	0.175668	UR	484	1	29852280	29969218
5	53	GLM	MAF5	SNP	2-phenylethyl acetate_UR	29926884	6.92e-06	0.175668	UR	484	1	29852280	29969218
6	11	GLM	G7	SNP	2-phenylethyl acetate_UR	3359259	1.06e-05	0.16997	UR	85	1	2924244	3597266
6	11	GLM	MAF5	SNP	2-phenylethyl acetate_UR	3359259	1.06e-05	0.16997	UR	85	1	2924244	3597266
5	49	GLM	G7	SNP	2-phenylethyl acetate_UR	29172287	1.6e-05	0.164325	UR	460	2	28530169	29395287
10	26	GLM	G7	SNP	Acetate de benzyle_R	5228191	8.15e-06	0.180116	R	180	2	5153882	5419006
10	26	GLM	MAF5	SNP	Acetate de benzyle_R	5228191	8.15e-06	0.180116	R	180	2	5153882	5419006
9	6	GLM	G7	SNP	Acetate de phenylethyle + 2-ethylphenol_R	1109358	9.68e-08	0.232616	R	44	1	1109358	1233013
9	6	GLM	MAF5	SNP	Acetate de phenylethyle + 2-ethylphenol_R	1109358	9.68e-08	0.232616	R	44	1	1109358	1233013
1	26	GLM	G7	SNP	Acetate de phenylethyle + 2-ethylphenol_R	6855567	5.06e-07	0.211516	R	228	2	6834165	7942921
1	26	GLM	MAF5	SNP	Acetate de phenylethyle + 2-ethylphenol_R	6855567	5.06e-07	0.211516	R	228	2	6834165	7942921
9	10	GLM	G7	SNP	Acetate de phenylethyle + 2-ethylphenol_R	1538705	8.78e-07	0.204372	R	66	2	1537448	2208503
9	10	GLM	MAF5	SNP	Acetate de phenylethyle + 2-ethylphenol_R	1538705	8.78e-07	0.204372	R	66	2	1537448	2208503
1	26	GLM	G7	SNP	Acetate de phenylethyle + 2-ethylphenol_R	7081063	9.28e-07	0.203641	R	230	1	6834165	7942921
1	88	MLM	MAF5	SNP	Acetate de phenylethyle + 2-ethylphenol_R	35960257	1.9e-06	0.199068	R	820	1	35860531	35976252
10	26	GLM	G7	SNP	Acetate de phenylethyle + 2-ethylphenol_R	5308832	2.13e-06	0.192736	R	182	1	5153882	5419006
10	26	GLM	MAF5	SNP	Acetate de phenylethyle + 2-ethylphenol_R	5308832	2.13e-06	0.192736	R	182	1	5153882	5419006
1	9	GLM	G7	SNP	Acetate de phenylethyle + 2-ethylphenol_R	3940448	2.23e-06	0.192112	R	116	3	3648137	4066843
1	9	GLM	MAF5	SNP	Acetate de phenylethyle + 2-ethylphenol_R	3940448	2.23e-06	0.192112	R	116	3	3648137	4066843
1	NA	GLM	MAF5	SNP	Acetate de phenylethyle + 2-ethylphenol_R	4079457	4.25e-06	0.158544	R	120	1	4079457	4079457
1	25	GLM	G7	SNP	Acetate de phenylethyle + 2-ethylphenol_R	6834137	5.36e-06	0.180416	R	226	2	6827616	6834137
1	25	GLM	MAF5	SNP	Acetate de phenylethyle + 2-ethylphenol_R	6834137	5.36e-06	0.180416	R	226	2	6827616	6834137
3	66	GLM	MAF5	SNP	Acetate de phenylethyle + 2-ethylphenol_R	35186135	5.62e-06	0.179778	R	714	1	34866251	35290974
4	39	MLM	MAF5	SNP	Acetate de phenylethyle + 2-ethylphenol_R	23199282	7.2e-06	0.156213	R	348	1	22671107	23365683
4	39	GLM	G7	SNP	Acetate de phenylethyle + 2-ethylphenol_R	23199282	8.08e-06	0.150061	R	348	1	22671107	23365683
4	39	GLM	MAF5	SNP	Acetate de phenylethyle + 2-ethylphenol_R	23199282	8.08e-06	0.150061	R	348	1	22671107	23365683
9	6	MLM	G7	SNP	Acetate de phenylethyle + 2-ethylphenol_R	1109358	9.55e-06	0.177047	R	44	1	1109358	1233013
4	39	MLM	G7	SNP	Acetate de phenylethyle + 2-ethylphenol_R	23199282	9.91e-06	0.151767	R	348	1	22671107	23365683
1	7	GLM	G7	SNP	Acetate de phenylethyle + 2-ethylphenol_R	3379361	1.08e-05	0.170952	R	100	2	3083032	3398183
1	7	GLM	MAF5	SNP	Acetate de phenylethyle + 2-ethylphenol_R	3379361	1.08e-05	0.170952	R	100	2	3083032	3398183
10	15	GLM	G7	SNP	Acetate de phenylethyle + 2-ethylphenol_R	3593240	1.17e-05	0.169831	R	111	1	3483824	3629707
10	15	GLM	MAF5	SNP	Acetate de phenylethyle + 2-ethylphenol_R	3593240	1.17e-05	0.169831	R	111	1	3483824	3629707
9	10	MLM	G7	SNP	Acetate de phenylethyle + 2-ethylphenol_R	1538705	1.21e-05	0.174073	R	66	1	1537448	2208503
9	8	GLM	G7	SNP	Acetate de phenylethyle + 2-ethylphenol_R	1425780	1.24e-05	0.16907	R	60	1	1425778	1425780
9	8	GLM	MAF5	SNP	Acetate de phenylethyle + 2-ethylphenol_R	1425780	1.24e-05	0.16907	R	60	1	1425778	1425780
2	72	GLM	G7	SNP	Acetate de phenylethyle + 2-ethylphenol_R	38064321	1.41e-05	0.142609	R	695	1	37921831	38443664
2	72	GLM	MAF5	SNP	Acetate de phenylethyle + 2-ethylphenol_R	38064321	1.41e-05	0.142609	R	695	1	37921831	38443664
9	10	MLM	MAF5	SNP	Acetate de phenylethyle + 2-ethylphenol_R	1538705	1.58e-05	0.170502	R	66	1	1537448	2208503
3	66	GLM	NA	SSR	Acetate de phenylethyle + 2-ethylphenol_R	35287652	9.35e-05	0.0940696	R	SSR	1	34866251	35290974
1	NA	GLM	NA	SSR	Acetate de phenylethyle + 2-ethylphenol_R	4938891	0.000187	0.128007	R	SSR	1	4938891	4938891
9	NA	GLM	NA	SSR	Acetate de phenylethyle + 2-ethylphenol_R	2928622	0.000217	0.0826903	R	SSR	1	2928622	2928622
4	NA	GLM	NA	SSR	Acetate de phenylethyle + 2-ethylphenol_R	2459160	0.000235	0.0848871	R	SSR	1	2459160	2459160
9	14	GLM	MAF5	SNP	Acetate de propyle_R	3653985	2.42e-14	0.401901	R	132	2	3143509	3836079
3	NA	GLM	MAF5	SNP	Acetate de propyle_R	35446132	4.34e-14	0.396137	R	734	1	35446132	35446132
5	30	GLM	MAF5	SNP	Acetate de propyle_R	6022103	5.98e-14	0.392953	R	237	2	5933079	6122894
4	51	GLM	MAF5	SNP	Acetate de propyle_R	26876494	7.32e-14	0.39093	R	460	8	26703951	27146370
4	NA	GLM	MAF5	SNP	Acetate de propyle_R	27162797	7.9e-14	0.390172	R	480	1	27162797	27162797
4	54	GLM	MAF5	SNP	Acetate de propyle_R	27445496	8.08e-14	0.389951	R	501	2	27321177	27486751
4	49	GLM	MAF5	SNP	Acetate de propyle_R	26543385	8.48e-14	0.389461	R	449	4	26543310	26589497
4	NA	GLM	MAF5	SNP	Acetate de propyle_R	27273500	8.53e-14	0.389402	R	491	1	27273500	27273500
4	NA	GLM	MAF5	SNP	Acetate de propyle_R	27821881	1.05e-13	0.387321	R	512	1	27821881	27821881
4	59	GLM	MAF5	SNP	Acetate de propyle_R	28203905	1.05e-13	0.387295	R	530	3	28203905	28222124
4	60	GLM	MAF5	SNP	Acetate de propyle_R	28285175	1.08e-13	0.387011	R	538	2	28257730	28352788
4	56	GLM	MAF5	SNP	Acetate de propyle_R	27985370	1.11e-13	0.386744	R	517	1	27838153	28035296
4	NA	GLM	MAF5	SNP	Acetate de propyle_R	27666259	1.12e-13	0.386707	R	510	1	27666259	27666259
1	NA	GLM	MAF5	SNP	Acetate de propyle_R	3019175	1.23e-13	0.38573	R	83	1	3019175	3019175
9	14	MLM	MAF5	SNP	Acetate de propyle_R	3653985	4.24e-12	0.356856	R	132	2	3143509	3836079
4	51	MLM	MAF5	SNP	Acetate de propyle_R	26876494	2.67e-11	0.337061	R	460	6	26703951	27146370
4	54	MLM	MAF5	SNP	Acetate de propyle_R	27445496	2.84e-11	0.3366	R	501	2	27321177	27486751
4	NA	MLM	MAF5	SNP	Acetate de propyle_R	27162797	2.92e-11	0.336053	R	480	1	27162797	27162797
4	49	MLM	MAF5	SNP	Acetate de propyle_R	26543385	3.04e-11	0.335657	R	449	4	26543310	26589497
4	NA	MLM	MAF5	SNP	Acetate de propyle_R	27273500	3.15e-11	0.335388	R	491	1	27273500	27273500
3	NA	MLM	MAF5	SNP	Acetate de propyle_R	35446132	3.36e-11	0.334593	R	734	1	35446132	35446132
4	60	MLM	MAF5	SNP	Acetate de propyle_R	28285175	4.04e-11	0.33251	R	538	2	28257730	28352788
4	59	MLM	MAF5	SNP	Acetate de propyle_R	28203905	4.06e-11	0.332387	R	530	2	28203905	28222124
4	NA	MLM	MAF5	SNP	Acetate de propyle_R	27821881	4.07e-11	0.33251	R	512	1	27821881	27821881
4	NA	MLM	MAF5	SNP	Acetate de propyle_R	27666259	4.08e-11	0.332479	R	510	1	27666259	27666259
1	NA	MLM	MAF5	SNP	Acetate de propyle_R	3019175	4.31e-11	0.331716	R	83	1	3019175	3019175
5	30	MLM	MAF5	SNP	Acetate de propyle_R	6022103	4.38e-11	0.331534	R	237	2	5933079	6122894
4	56	MLM	MAF5	SNP	Acetate de propyle_R	27985370	4.39e-11	0.331574	R	517	1	27838153	28035296
6	17	MLM	G7	SNP	Acetate de propyle_R	4309692	1.99e-08	0.260515	R	105	2	4280030	5627934
6	17	MLM	MAF5	SNP	Acetate de propyle_R	4309692	3.9e-08	0.252306	R	105	2	4280030	5627934
5	NA	MLM	MAF5	SNP	Acetate de propyle_R	27018687	8.71e-08	0.241953	R	398	1	27018687	27018687
5	NA	MLM	G7	SNP	Acetate de propyle_R	27018687	1.12e-07	0.238345	R	398	1	27018687	27018687
5	49	GLM	MAF5	SNP	Acetate de propyle_R	28619215	1.42e-07	0.227733	R	446	1	28530169	29395287
5	NA	GLM	MAF5	SNP	Acetate de propyle_R	3134646	2.81e-07	0.219103	R	167	1	3134646	3134646
1	21	GLM	MAF5	SNP	Acetate de propyle_R	6204028	2.87e-07	0.218819	R	202	4	5940526	6204028
1	22	GLM	MAF5	SNP	Acetate de propyle_R	6309593	2.92e-07	0.218607	R	206	1	6248007	6310517
9	NA	GLM	MAF5	SNP	Acetate de propyle_R	3895977	3.31e-07	0.21699	R	141	1	3895977	3895977
3	50	GLM	MAF5	SNP	Acetate de propyle_R	29421791	3.69e-07	0.215609	R	481	1	29377645	29421791
3	51	GLM	MAF5	SNP	Acetate de propyle_R	29479613	3.78e-07	0.215276	R	486	1	29479613	29720600
1	18	GLM	MAF5	SNP	Acetate de propyle_R	5551864	3.97e-07	0.214657	R	174	3	5356899	5820933
1	16	GLM	MAF5	SNP	Acetate de propyle_R	4761778	3.98e-07	0.21461	R	155	3	4668890	4875804
1	17	GLM	MAF5	SNP	Acetate de propyle_R	4991010	3.98e-07	0.21461	R	163	1	4973179	5305096
1	NA	GLM	MAF5	SNP	Acetate de propyle_R	5323693	3.98e-07	0.214618	R	168	1	5323693	5323693
3	NA	GLM	MAF5	SNP	Acetate de propyle_R	27006470	4.22e-07	0.213867	R	389	1	27006470	27006470
10	12	MLM	MAF5	SNP	Acetate de propyle_R	2912061	4.41e-07	0.220792	R	85	1	2623845	2925508
9	17	GLM	MAF5	SNP	Acetate de propyle_R	4230979	5.07e-07	0.211487	R	163	3	4071956	4749406
1	9	GLM	MAF5	SNP	Acetate de propyle_R	3761256	6.17e-07	0.208964	R	112	4	3648137	4066843
1	9	GLM	G7	SNP	Acetate de propyle_R	3721132	6.18e-07	0.208928	R	111	2	3648137	4066843
8	29	GLM	MAF5	SNP	Acetate de propyle_R	7486223	7.79e-07	0.205931	R	339	1	7268296	7486223
5	NA	MLM	MAF5	SNP	Acetate de propyle_R	3134646	1.09e-06	0.206615	R	167	1	3134646	3134646
10	NA	GLM	MAF5	SNP	Acetate de propyle_R	11489815	1.26e-06	0.199626	R	241	1	11489815	11489815
5	87	GLM	MAF5	SNP	Acetate de propyle_R	38411373	1.32e-06	0.199011	R	803	1	38378897	38553436
7	8	GLM	MAF5	SNP	Acetate de propyle_R	1836370	1.33e-06	0.198899	R	92	1	1836370	1842507
7	9	GLM	MAF5	SNP	Acetate de propyle_R	1955617	1.35e-06	0.19871	R	99	2	1894664	2092063
3	67	GLM	MAF5	SNP	Acetate de propyle_R	35390997	1.69e-06	0.195781	R	728	1	35328537	35390997
2	76	MLM	MAF5	SNP	Acetate de propyle_R	39561863	1.86e-06	0.201298	R	744	1	39561863	39571370
8	NA	GLM	G7	SNP	Acetate de propyle_R	9840784	2.23e-06	0.166995	R	NA	1	9840784	9840784
3	55	GLM	MAF5	SNP	Acetate de propyle_R	30752152	2.81e-06	0.189048	R	552	1	30271279	30948946
2	NA	GLM	MAF5	SNP	Acetate de propyle_R	107762	3.23e-06	0.187203	R	8	1	107762	107762
2	9	GLM	MAF5	SNP	Acetate de propyle_R	777460	3.32e-06	0.186825	R	49	2	748585	777460
2	12	GLM	MAF5	SNP	Acetate de propyle_R	954440	3.34e-06	0.186738	R	63	2	939126	1030788
2	NA	GLM	MAF5	SNP	Acetate de propyle_R	875109	3.43e-06	0.186406	R	56	1	875109	875109
1	18	GLM	G7	SNP	Acetate de propyle_R	5820933	3.47e-06	0.186235	R	182	2	5356899	5820933
5	NA	GLM	MAF5	SNP	Acetate de propyle_R	5870806	4.2e-06	0.183688	R	232	1	5870806	5870806
9	NA	MLM	MAF5	SNP	Acetate de propyle_R	3895977	4.32e-06	0.189092	R	141	1	3895977	3895977
8	29	MLM	MAF5	SNP	Acetate de propyle_R	7486223	4.66e-06	0.187024	R	339	1	7268296	7486223
2	76	MLM	G7	SNP	Acetate de propyle_R	39561863	4.71e-06	0.188243	R	744	1	39561863	39571370
1	14	MLM	MAF5	SNP	Acetate de propyle_R	4498932	4.81e-06	0.188162	R	144	1	4498874	4528589
1	19	GLM	MAF5	SNP	Acetate de propyle_R	5859617	5.35e-06	0.180433	R	184	1	5859617	5864417
1	23	GLM	MAF5	SNP	Acetate de propyle_R	6381788	6.26e-06	0.178325	R	208	1	6381788	6674915
1	14	MLM	G7	SNP	Acetate de propyle_R	4498932	6.69e-06	0.183178	R	144	1	4498874	4528589
10	42	GLM	G7	SNP	Acetate de propyle_R	17714541	6.96e-06	0.176891	R	315	1	17578812	17714542
10	42	GLM	MAF5	SNP	Acetate de propyle_R	17714541	6.96e-06	0.176891	R	315	1	17578812	17714542
8	NA	MLM	G7	SNP	Acetate de propyle_R	9840741	7.12e-06	0.155913	R	NA	1	9840741	9840741
10	NA	MLM	MAF5	SNP	Acetate de propyle_R	11489815	9.78e-06	0.176783	R	241	1	11489815	11489815
7	8	MLM	MAF5	SNP	Acetate de propyle_R	1836370	1.03e-05	0.176244	R	92	1	1836370	1842507
9	17	MLM	MAF5	SNP	Acetate de propyle_R	4186510	1.05e-05	0.176788	R	162	3	4071956	4749406
7	9	MLM	MAF5	SNP	Acetate de propyle_R	1955617	1.07e-05	0.175774	R	99	2	1894664	2092063
3	50	MLM	MAF5	SNP	Acetate de propyle_R	29421791	1.14e-05	0.175808	R	481	1	29377645	29421791
3	51	MLM	MAF5	SNP	Acetate de propyle_R	29479613	1.14e-05	0.175757	R	486	1	29479613	29720600
3	NA	GLM	MAF5	SNP	Acetate de propyle_R	35412158	1.54e-05	0.166127	R	729	1	35412158	35412158
1	NA	GLM	NA	SSR	Acetate de propyle_R	5502436	3.65e-05	0.15098	R	SSR	1	5502436	5502436
1	NA	GLM	NA	SSR	Acetate de propyle_R	4938891	0.000265	0.121241	R	SSR	1	4938891	4938891
1	91	MLM	MAF5	SNP	Acetate d'ethylphenyle_R	36447062	1.35e-05	0.165241	R	846	1	36445596	36651736
2	39	GLM	NA	SSR	Acetophenone_UR	8389914	2.53e-12	0.310365	UR	SSR	1	8239972	8416672
9	58	GLM	MAF5	SNP	Acetophenone_UR	38188583	1.71e-10	0.306292	UR	701	3	38121367	38300579
7	9	GLM	MAF5	SNP	Acetophenone_UR	2092063	9.65e-10	0.286475	UR	104	1	1894664	2092063
4	NA	GLM	MAF5	SNP	Acetophenone_UR	17349904	2.21e-09	0.251496	UR	231	1	17349904	17349904
5	9	GLM	MAF5	SNP	Acetophenone_UR	1353636	3.46e-09	0.271526	UR	76	1	1326444	1374494
7	9	MLM	MAF5	SNP	Acetophenone_UR	2092063	3.61e-09	0.274389	UR	104	1	1894664	2092063
8	41	GLM	G7	SNP	Acetophenone_UR	17506977	5.54e-09	0.265911	UR	442	2	17506977	17644612
8	41	GLM	MAF5	SNP	Acetophenone_UR	17506977	5.54e-09	0.265911	UR	442	2	17506977	17644612
2	37	GLM	MAF5	SNP	Acetophenone_UR	8086932	6.22e-09	0.264535	UR	341	8	7812200	8143718
2	39	GLM	MAF5	SNP	Acetophenone_UR	8312361	6.22e-09	0.264535	UR	355	4	8239972	8416672
5	9	MLM	MAF5	SNP	Acetophenone_UR	1353636	7.87e-09	0.265319	UR	76	1	1326444	1374494
5	10	GLM	MAF5	SNP	Acetophenone_UR	1380802	1.22e-08	0.256396	UR	80	5	1380802	1510054
2	38	GLM	MAF5	SNP	Acetophenone_UR	8232103	1.31e-08	0.255592	UR	348	3	8216923	8236790
7	11	MLM	MAF5	SNP	Acetophenone_UR	2815797	1.45e-08	0.25782	UR	120	3	2573666	2856874
5	7	MLM	MAF5	SNP	Acetophenone_UR	1240806	1.59e-08	0.256855	UR	70	1	906367	1240806
5	8	MLM	MAF5	SNP	Acetophenone_UR	1246790	1.64e-08	0.256586	UR	72	2	1240815	1254264
5	8	GLM	MAF5	SNP	Acetophenone_UR	1254264	1.84e-08	0.251414	UR	73	2	1240815	1254264
7	11	GLM	MAF5	SNP	Acetophenone_UR	2815797	2.11e-08	0.24977	UR	120	3	2573666	2856874
5	7	GLM	MAF5	SNP	Acetophenone_UR	1240806	2.23e-08	0.249109	UR	70	1	906367	1240806
5	NA	GLM	MAF5	SNP	Acetophenone_UR	1529974	2.58e-08	0.247307	UR	87	1	1529974	1529974
5	11	GLM	MAF5	SNP	Acetophenone_UR	1607606	2.76e-08	0.246499	UR	91	1	1579945	1800602
5	13	GLM	MAF5	SNP	Acetophenone_UR	1905939	2.76e-08	0.246499	UR	104	2	1903641	1992775
7	NA	GLM	MAF5	SNP	Acetophenone_UR	2449401	2.78e-08	0.246412	UR	115	1	2449401	2449401
5	10	MLM	MAF5	SNP	Acetophenone_UR	1380802	3.08e-08	0.248802	UR	80	5	1380802	1510054
2	NA	GLM	NA	SSR	Acetophenone_UR	11231613	4.23e-08	0.309345	UR	SSR	1	11231613	11231613
5	11	MLM	MAF5	SNP	Acetophenone_UR	1607606	1.13e-07	0.23267	UR	91	1	1579945	1800602
5	13	MLM	MAF5	SNP	Acetophenone_UR	1992775	1.33e-07	0.230597	UR	111	2	1903641	1992775
5	NA	MLM	MAF5	SNP	Acetophenone_UR	1529974	1.61e-07	0.228148	UR	87	1	1529974	1529974
2	56	GLM	MAF5	SNP	Acetophenone_UR	25549521	1.65e-07	0.224262	UR	539	4	23909636	27037630
9	58	MLM	MAF5	SNP	Acetophenone_UR	38188583	1.96e-07	0.225681	UR	701	2	38121367	38300579
2	NA	GLM	G7	SNP	Acetophenone_UR	8193772	2.16e-07	0.220878	UR	345	1	8193772	8193772
2	NA	GLM	MAF5	SNP	Acetophenone_UR	8193772	2.16e-07	0.220878	UR	345	1	8193772	8193772
8	NA	GLM	G7	SNP	Acetophenone_UR	17113165	8.8e-07	0.202851	UR	435	1	17113165	17113165
8	NA	GLM	MAF5	SNP	Acetophenone_UR	17113165	8.8e-07	0.202851	UR	435	1	17113165	17113165
8	38	GLM	G7	SNP	Acetophenone_UR	15850461	9.35e-07	0.202076	UR	424	2	15847204	15850461
8	38	GLM	MAF5	SNP	Acetophenone_UR	15850461	9.35e-07	0.202076	UR	424	2	15847204	15850461
3	4	GLM	MAF5	SNP	Acetophenone_UR	939666	9.53e-07	0.201826	UR	35	1	939572	967024
1	88	GLM	G7	SNP	Acetophenone_UR	35908480	1.09e-06	0.200124	UR	815	1	35860531	35976252
1	88	GLM	MAF5	SNP	Acetophenone_UR	35908480	1.09e-06	0.200124	UR	815	1	35860531	35976252
7	NA	MLM	MAF5	SNP	Acetophenone_UR	2449401	1.4e-06	0.19949	UR	115	1	2449401	2449401
6	31	GLM	NA	SSR	Acetophenone_UR	15569290	1.82e-06	0.133091	UR	SSR	1	15345273	16098085
2	43	GLM	G7	SNP	Acetophenone_UR	9873165	2e-06	0.192175	UR	386	1	9873165	9873253
2	43	GLM	MAF5	SNP	Acetophenone_UR	9873165	2e-06	0.192175	UR	386	1	9873165	9873253
7	NA	GLM	MAF5	SNP	Acetophenone_UR	2238877	2.03e-06	0.191942	UR	108	1	2238877	2238877
5	25	GLM	G7	SNP	Acetophenone_UR	3695118	4.77e-06	0.180632	UR	189	1	3651475	3765309
5	25	GLM	MAF5	SNP	Acetophenone_UR	3695118	4.77e-06	0.180632	UR	189	1	3651475	3765309
8	7	GLM	G7	SNP	Acetophenone_UR	2413498	4.9e-06	0.180274	UR	112	1	2327564	2435987
8	7	GLM	MAF5	SNP	Acetophenone_UR	2413498	4.9e-06	0.180274	UR	112	1	2327564	2435987
9	NA	GLM	NA	SSR	Acetophenone_UR	643236	5e-06	0.13784	UR	SSR	1	643236	643236
7	NA	MLM	MAF5	SNP	Acetophenone_UR	2238877	5.88e-06	0.179895	UR	108	1	2238877	2238877
8	26	GLM	NA	SSR	Acetophenone_UR	6751843	8.69e-06	0.18344	UR	SSR	1	6533242	6978549
2	57	GLM	MAF5	SNP	Acetophenone_UR	28827440	9.54e-06	0.171363	UR	555	3	27852246	29867634
2	55	GLM	MAF5	SNP	Acetophenone_UR	23034211	9.68e-06	0.171169	UR	519	1	22102099	23107515
2	NA	GLM	MAF5	SNP	Acetophenone_UR	21645995	1.23e-05	0.167873	UR	512	1	21645995	21645995
6	NA	GLM	MAF5	SNP	Acetophenone_UR	13900312	1.37e-05	0.166495	UR	209	1	13900312	13900312
5	83	GLM	G7	SNP	Acetophenone_UR	37865088	1.43e-05	0.141422	UR	773	1	37796878	37867770
5	83	GLM	MAF5	SNP	Acetophenone_UR	37865088	1.43e-05	0.141422	UR	773	1	37796878	37867770
6	NA	GLM	NA	SSR	Acetophenone_UR	13706432	3.74e-05	0.101088	UR	SSR	1	13706432	13706432
11	NA	GLM	NA	SSR	Acetophenone_UR	NA	6.27e-05	0.101603	UR	SSR	1	NA	NA
6	23	GLM	NA	SSR	Acetophenone_UR	10327707	0.000109	0.0906549	UR	SSR	1	10172235	11576647
2	36	GLM	NA	SSR	Acetophenone_UR	7453377	0.000124	0.12902	UR	SSR	1	7324500	7617242
2	13	GLM	NA	SSR	Acetophenone_UR	1067092	0.000216	0.152469	UR	SSR	1	1065901	1181828
6	58	GLM	G7	SNP	Acetophenone_R	23097785	1.59e-08	0.254987	R	445	1	23097785	23108368
6	58	GLM	MAF5	SNP	Acetophenone_R	23097785	1.59e-08	0.254987	R	445	1	23097785	23108368
6	60	GLM	G7	SNP	Acetophenone_R	23466264	1.04e-07	0.231728	R	459	2	23432637	23531966
6	60	GLM	MAF5	SNP	Acetophenone_R	23466264	1.04e-07	0.231728	R	459	2	23432637	23531966
1	23	GLM	MAF5	SNP	Acetophenone_R	6448063	1.34e-07	0.228507	R	210	6	6381788	6674915
6	NA	GLM	G7	SNP	Acetophenone_R	23566379	2.72e-07	0.219516	R	467	1	23566379	23566379
6	NA	GLM	MAF5	SNP	Acetophenone_R	23566379	2.72e-07	0.219516	R	467	1	23566379	23566379
6	64	GLM	G7	SNP	Acetophenone_R	23951451	2.97e-07	0.218386	R	481	6	23913803	25147021
6	64	GLM	MAF5	SNP	Acetophenone_R	23951451	2.97e-07	0.218386	R	481	6	23913803	25147021
1	23	GLM	G7	SNP	Acetophenone_R	6614869	3.49e-07	0.216308	R	214	4	6381788	6674915
1	25	GLM	G7	SNP	Acetophenone_R	6834137	3.63e-07	0.215812	R	226	1	6827616	6834137
1	25	GLM	MAF5	SNP	Acetophenone_R	6834137	3.63e-07	0.215812	R	226	1	6827616	6834137
6	NA	GLM	G7	SNP	Acetophenone_R	23150153	5.45e-07	0.210556	R	447	1	23150153	23150153
6	NA	GLM	MAF5	SNP	Acetophenone_R	23150153	5.45e-07	0.210556	R	447	1	23150153	23150153
6	65	GLM	G7	SNP	Acetophenone_R	25213164	7.09e-07	0.207143	R	507	2	25201654	25545192
6	65	GLM	MAF5	SNP	Acetophenone_R	25213164	7.09e-07	0.207143	R	507	2	25201654	25545192
1	26	GLM	G7	SNP	Acetophenone_R	7081063	7.52e-07	0.206383	R	230	2	6834165	7942921
1	26	GLM	MAF5	SNP	Acetophenone_R	7081063	7.52e-07	0.206383	R	230	2	6834165	7942921
9	33	GLM	MAF5	SNP	Acetophenone_R	23302911	7.82e-07	0.205868	R	419	3	23101222	23892356
6	NA	GLM	G7	SNP	Acetophenone_R	22981305	8.85e-07	0.204265	R	442	1	22981305	22981305
6	NA	GLM	MAF5	SNP	Acetophenone_R	22981305	8.85e-07	0.204265	R	442	1	22981305	22981305
6	63	GLM	G7	SNP	Acetophenone_R	23864782	9.55e-07	0.203275	R	477	2	23848056	23864782
6	63	GLM	MAF5	SNP	Acetophenone_R	23864782	9.55e-07	0.203275	R	477	2	23848056	23864782
1	25	MLM	G7	SNP	Acetophenone_R	6834137	1.39e-06	0.18944	R	226	1	6827616	6834137
6	57	GLM	G7	SNP	Acetophenone_R	22926936	2.16e-06	0.192555	R	437	1	22926936	22960408
6	57	GLM	MAF5	SNP	Acetophenone_R	22926936	2.16e-06	0.192555	R	437	1	22926936	22960408
6	NA	GLM	G7	SNP	Acetophenone_R	23535728	2.31e-06	0.191658	R	463	1	23535728	23535728
6	NA	GLM	MAF5	SNP	Acetophenone_R	23535728	2.31e-06	0.191658	R	463	1	23535728	23535728
3	44	GLM	G7	SNP	Acetophenone_R	27696466	2.44e-06	0.190941	R	425	6	27183974	27696466
3	44	GLM	MAF5	SNP	Acetophenone_R	27696466	2.44e-06	0.190941	R	425	6	27183974	27696466
6	47	GLM	G7	SNP	Acetophenone_R	21525718	3.12e-06	0.187676	R	366	2	21458845	21577257
6	47	GLM	MAF5	SNP	Acetophenone_R	21525718	3.12e-06	0.187676	R	366	2	21458845	21577257
3	48	GLM	G7	SNP	Acetophenone_R	28040928	3.17e-06	0.187434	R	443	1	27982157	28410173
3	48	GLM	MAF5	SNP	Acetophenone_R	28040928	3.17e-06	0.187434	R	443	1	27982157	28410173
2	75	GLM	G7	SNP	Acetophenone_R	39294489	3.32e-06	0.186828	R	735	3	38949264	39479697
2	75	GLM	MAF5	SNP	Acetophenone_R	39294489	3.32e-06	0.186828	R	735	2	38949264	39479697
6	33	GLM	G7	SNP	Acetophenone_R	16958029	3.74e-06	0.185221	R	240	3	16858027	17659192
6	33	GLM	MAF5	SNP	Acetophenone_R	16958029	3.74e-06	0.185221	R	240	2	16858027	17659192
1	7	GLM	G7	SNP	Acetophenone_R	3363552	3.86e-06	0.18483	R	99	7	3083032	3398183
1	7	GLM	MAF5	SNP	Acetophenone_R	3363552	3.86e-06	0.18483	R	99	6	3083032	3398183
1	25	MLM	MAF5	SNP	Acetophenone_R	6834137	4.27e-06	0.182593	R	226	1	6827616	6834137
1	26	MLM	G7	SNP	Acetophenone_R	7081063	4.57e-06	0.176084	R	230	2	6834165	7942921
2	36	GLM	G7	SNP	Acetophenone_R	7448797	4.76e-06	0.182005	R	314	1	7324500	7617242
2	36	GLM	MAF5	SNP	Acetophenone_R	7448797	4.76e-06	0.182005	R	314	1	7324500	7617242
6	61	GLM	G7	SNP	Acetophenone_R	23566299	4.79e-06	0.181915	R	466	2	23550051	23566299
6	61	GLM	MAF5	SNP	Acetophenone_R	23566299	4.79e-06	0.181915	R	466	2	23550051	23566299
7	NA	GLM	MAF5	SNP	Acetophenone_R	2218633	4.95e-06	0.156536	R	105	1	2218633	2218633
1	2	GLM	G7	SNP	Acetophenone_R	311606	5.88e-06	0.179164	R	11	1	311606	555162
1	2	GLM	MAF5	SNP	Acetophenone_R	311606	5.88e-06	0.179164	R	11	1	311606	555162
6	52	GLM	G7	SNP	Acetophenone_R	22210495	6.15e-06	0.17857	R	402	1	22210495	22215293
6	52	GLM	MAF5	SNP	Acetophenone_R	22210495	6.15e-06	0.17857	R	402	1	22210495	22215293
3	NA	GLM	G7	SNP	Acetophenone_R	26341999	6.47e-06	0.177884	R	347	1	26341999	26341999
3	NA	GLM	MAF5	SNP	Acetophenone_R	26341999	6.47e-06	0.177884	R	347	1	26341999	26341999
6	54	GLM	G7	SNP	Acetophenone_R	22496338	6.78e-06	0.177247	R	420	2	22393667	22625006
6	54	GLM	MAF5	SNP	Acetophenone_R	22496338	6.78e-06	0.177247	R	420	2	22393667	22625006
10	6	GLM	G7	SNP	Acetophenone_R	1610826	7e-06	0.176823	R	43	1	1551551	1610826
10	6	GLM	MAF5	SNP	Acetophenone_R	1610826	7e-06	0.176823	R	43	1	1551551	1610826
2	73	GLM	G7	SNP	Acetophenone_R	38600718	7.39e-06	0.176086	R	712	1	38594168	38610216
2	73	GLM	MAF5	SNP	Acetophenone_R	38600718	7.39e-06	0.176086	R	712	1	38594168	38610216
9	NA	GLM	G7	SNP	Acetophenone_R	664982	7.48e-06	0.17592	R	28	1	664982	664982
9	NA	GLM	MAF5	SNP	Acetophenone_R	664982	7.48e-06	0.17592	R	28	1	664982	664982
6	NA	GLM	G7	SNP	Acetophenone_R	16631404	7.49e-06	0.175902	R	234	1	16631404	16631404
6	NA	GLM	MAF5	SNP	Acetophenone_R	16631404	7.49e-06	0.175902	R	234	1	16631404	16631404
6	NA	GLM	G7	SNP	Acetophenone_R	22263982	7.8e-06	0.175358	R	406	1	22263982	22263982
6	NA	GLM	MAF5	SNP	Acetophenone_R	22263982	7.8e-06	0.175358	R	406	1	22263982	22263982
6	50	GLM	G7	SNP	Acetophenone_R	22196261	7.97e-06	0.175066	R	399	1	22110904	22196261
6	50	GLM	MAF5	SNP	Acetophenone_R	22196261	7.97e-06	0.175066	R	399	1	22110904	22196261
3	49	GLM	G7	SNP	Acetophenone_R	28498827	8.94e-06	0.173521	R	453	1	28465056	29372073
3	49	GLM	MAF5	SNP	Acetophenone_R	28498827	8.94e-06	0.173521	R	453	1	28465056	29372073
9	10	GLM	MAF5	SNP	Acetophenone_R	1548388	9.09e-06	0.173291	R	67	1	1537448	2208503
6	NA	GLM	G7	SNP	Acetophenone_R	23609639	9.65e-06	0.17248	R	469	1	23609639	23609639
6	NA	GLM	MAF5	SNP	Acetophenone_R	23609639	9.65e-06	0.17248	R	469	1	23609639	23609639
9	3	GLM	G7	SNP	Acetophenone_R	434906	1.02e-05	0.171674	R	18	1	281991	598128
9	3	GLM	MAF5	SNP	Acetophenone_R	434906	1.02e-05	0.171674	R	18	1	281991	598128
3	NA	GLM	G7	SNP	Acetophenone_R	27106193	1.17e-05	0.169917	R	397	1	27106193	27106193
3	NA	GLM	MAF5	SNP	Acetophenone_R	27106193	1.17e-05	0.169917	R	397	1	27106193	27106193
6	29	GLM	G7	SNP	Acetophenone_R	13899214	1.23e-05	0.169153	R	208	1	13898346	13899214
6	29	GLM	MAF5	SNP	Acetophenone_R	13899214	1.23e-05	0.169153	R	208	1	13898346	13899214
1	26	MLM	MAF5	SNP	Acetophenone_R	7081063	1.24e-05	0.168727	R	230	1	6834165	7942921
10	26	GLM	G7	SNP	Acetophenone_R	5308832	1.28e-05	0.168634	R	182	1	5153882	5419006
10	26	GLM	MAF5	SNP	Acetophenone_R	5308832	1.28e-05	0.168634	R	182	1	5153882	5419006
2	NA	GLM	G7	SNP	Acetophenone_R	7220848	1.33e-05	0.168064	R	306	1	7220848	7220848
2	NA	GLM	MAF5	SNP	Acetophenone_R	7220848	1.33e-05	0.168064	R	306	1	7220848	7220848
6	49	GLM	G7	SNP	Acetophenone_R	22036314	1.8e-05	0.163994	R	386	1	21698381	22089947
1	9	GLM	G7	SNP	Acetophenone_R	3940448	1.83e-05	0.163757	R	116	1	3648137	4066843
6	60	GLM	NA	SSR	Acetophenone_R	23489326	3.44e-05	0.184012	R	SSR	1	23432637	23531966
6	NA	GLM	NA	SSR	Acetophenone_R	3884725	4.75e-05	0.127483	R	SSR	1	3884725	3884725
2	NA	GLM	NA	SSR	Acetophenone_R	11231613	5.71e-05	0.220922	R	SSR	1	11231613	11231613
2	75	GLM	NA	SSR	Acetophenone_R	39390229	5.99e-05	0.11719	R	SSR	1	38949264	39479697
2	34	GLM	NA	SSR	Acetophenone_R	6500653	0.000176	0.123989	R	SSR	1	6444089	6563390
9	NA	GLM	NA	SSR	Acetophenone_R	1487433	0.000187	0.108122	R	SSR	1	1487433	1487433
8	1	GLM	NA	SSR	Acetophenone_R	685598	0.000201	0.158108	R	SSR	1	63487	904210
6	50	GLM	NA	SSR	Acetophenone_R	22113125	0.000236	0.0991174	R	SSR	1	22110904	22196261
10	27	GLM	NA	SSR	Acetophenone_R	6167221	0.000242	0.1488	R	SSR	1	6023982	6718126
9	NA	GLM	NA	SSR	Acetophenone_R	643236	0.000254	0.0920892	R	SSR	1	643236	643236
2	36	GLM	NA	SSR	Acetophenone_R	7453377	0.000258	0.12084	R	SSR	1	7324500	7617242
1	NA	GLM	NA	SSR	Acetophenone_R	5502436	0.000265	0.128157	R	SSR	1	5502436	5502436
7	9	MLM	MAF5	SNP	Benzyl acetate_UR	2092063	2.36e-15	0.411214	UR	104	1	1894664	2092063
7	9	GLM	MAF5	SNP	Benzyl acetate_UR	2092063	1.3e-13	0.382702	UR	104	1	1894664	2092063
2	39	GLM	NA	SSR	Benzyl acetate_UR	8389914	1.44e-11	0.294237	UR	SSR	1	8239972	8416672
2	NA	GLM	NA	SSR	Benzyl acetate_UR	11231613	3.6e-11	0.385374	UR	SSR	1	11231613	11231613
9	58	GLM	MAF5	SNP	Benzyl acetate_UR	38188583	8.69e-10	0.287698	UR	701	2	38121367	38300579
7	NA	MLM	MAF5	SNP	Benzyl acetate_UR	2238877	1.07e-09	0.276623	UR	108	1	2238877	2238877
7	NA	GLM	MAF5	SNP	Benzyl acetate_UR	2449401	2.12e-09	0.277298	UR	115	1	2449401	2449401
5	9	MLM	MAF5	SNP	Benzyl acetate_UR	1353636	3.02e-09	0.27453	UR	76	1	1326444	1374494
5	8	MLM	MAF5	SNP	Benzyl acetate_UR	1246790	4.84e-09	0.269355	UR	72	2	1240815	1254264
5	7	MLM	MAF5	SNP	Benzyl acetate_UR	1240806	6.05e-09	0.266531	UR	70	1	906367	1240806
5	9	GLM	MAF5	SNP	Benzyl acetate_UR	1353636	6.6e-09	0.263827	UR	76	1	1326444	1374494
7	NA	MLM	MAF5	SNP	Benzyl acetate_UR	2449401	7.02e-09	0.2611	UR	115	1	2449401	2449401
7	11	MLM	MAF5	SNP	Benzyl acetate_UR	2815797	7.28e-09	0.264223	UR	120	4	2573666	2856874
5	10	MLM	MAF5	SNP	Benzyl acetate_UR	1423467	7.79e-09	0.263641	UR	81	5	1380802	1510054
5	13	MLM	MAF5	SNP	Benzyl acetate_UR	1905939	1.06e-08	0.25996	UR	104	2	1903641	1992775
8	41	GLM	G7	SNP	Benzyl acetate_UR	17506977	1.15e-08	0.257102	UR	442	2	17506977	17644612
8	41	GLM	MAF5	SNP	Benzyl acetate_UR	17506977	1.15e-08	0.257102	UR	442	1	17506977	17644612
5	11	MLM	MAF5	SNP	Benzyl acetate_UR	1607606	1.2e-08	0.258555	UR	91	1	1579945	1800602
5	10	GLM	MAF5	SNP	Benzyl acetate_UR	1380802	1.49e-08	0.254016	UR	80	5	1380802	1510054
5	NA	MLM	MAF5	SNP	Benzyl acetate_UR	1529974	1.9e-08	0.25289	UR	87	1	1529974	1529974
5	13	GLM	MAF5	SNP	Benzyl acetate_UR	1992775	1.96e-08	0.250647	UR	111	2	1903641	1992775
5	8	GLM	MAF5	SNP	Benzyl acetate_UR	1246790	2.07e-08	0.250022	UR	72	2	1240815	1254264
5	7	GLM	MAF5	SNP	Benzyl acetate_UR	1240806	2.26e-08	0.248947	UR	70	1	906367	1240806
5	11	GLM	MAF5	SNP	Benzyl acetate_UR	1607606	2.26e-08	0.248946	UR	91	1	1579945	1800602
5	NA	GLM	MAF5	SNP	Benzyl acetate_UR	1529974	2.71e-08	0.24671	UR	87	1	1529974	1529974
7	11	GLM	MAF5	SNP	Benzyl acetate_UR	2815797	2.83e-08	0.2462	UR	120	4	2573666	2856874
9	58	MLM	MAF5	SNP	Benzyl acetate_UR	38134588	3.98e-08	0.243992	UR	697	2	38121367	38300579
7	NA	GLM	MAF5	SNP	Benzyl acetate_UR	2238877	4.6e-08	0.240219	UR	108	1	2238877	2238877
2	37	GLM	MAF5	SNP	Benzyl acetate_UR	8086932	6.61e-08	0.235713	UR	341	5	7812200	8143718
2	39	GLM	MAF5	SNP	Benzyl acetate_UR	8312361	6.61e-08	0.235713	UR	355	2	8239972	8416672
2	38	GLM	MAF5	SNP	Benzyl acetate_UR	8232103	2.1e-07	0.22124	UR	348	2	8216923	8236790
8	42	GLM	G7	SNP	Benzyl acetate_UR	19249315	2.53e-07	0.218851	UR	459	5	17816898	19249315
8	42	GLM	MAF5	SNP	Benzyl acetate_UR	19249315	2.53e-07	0.218851	UR	459	5	17816898	19249315
2	56	GLM	MAF5	SNP	Benzyl acetate_UR	25549521	3.97e-07	0.213115	UR	539	1	23909636	27037630
7	32	GLM	G7	SNP	Benzyl acetate_UR	11662890	5.32e-07	0.209347	UR	316	1	11339733	11706922
7	32	GLM	MAF5	SNP	Benzyl acetate_UR	11662890	5.32e-07	0.209347	UR	316	1	11339733	11706922
4	NA	GLM	MAF5	SNP	Benzyl acetate_UR	17349904	5.9e-07	0.182874	UR	231	1	17349904	17349904
2	NA	GLM	G7	SNP	Benzyl acetate_UR	11237626	6.46e-07	0.206853	UR	415	1	11237626	11237626
2	NA	GLM	MAF5	SNP	Benzyl acetate_UR	11237626	6.46e-07	0.206853	UR	415	1	11237626	11237626
5	25	GLM	G7	SNP	Benzyl acetate_UR	3695118	7.66e-07	0.204648	UR	189	1	3651475	3765309
5	25	GLM	MAF5	SNP	Benzyl acetate_UR	3695118	7.66e-07	0.204648	UR	189	1	3651475	3765309
9	52	GLM	NA	SSR	Benzyl acetate_UR	35920846	1.95e-06	0.19305	UR	SSR	2	35661701	36679476
2	NA	GLM	G7	SNP	Benzyl acetate_UR	8193772	2.94e-06	0.187051	UR	345	1	8193772	8193772
2	NA	GLM	MAF5	SNP	Benzyl acetate_UR	8193772	2.94e-06	0.187051	UR	345	1	8193772	8193772
9	NA	GLM	NA	SSR	Benzyl acetate_UR	643236	3.14e-06	0.1433	UR	SSR	1	643236	643236
5	28	GLM	G7	SNP	Benzyl acetate_UR	5119284	5.19e-06	0.179525	UR	217	1	5119284	5195817
5	28	GLM	MAF5	SNP	Benzyl acetate_UR	5119284	5.19e-06	0.179525	UR	217	1	5119284	5195817
8	38	GLM	G7	SNP	Benzyl acetate_UR	15850461	6.48e-06	0.176558	UR	424	2	15847204	15850461
8	38	GLM	MAF5	SNP	Benzyl acetate_UR	15850461	6.48e-06	0.176558	UR	424	2	15847204	15850461
3	29	MLM	G7	SNP	Benzyl acetate_UR	21788489	1.01e-05	0.147488	UR	NA	1	20869946	22404839
2	NA	GLM	G7	SNP	Benzyl acetate_UR	11174894	1.1e-05	0.144877	UR	414	1	11174894	11174894
2	NA	GLM	MAF5	SNP	Benzyl acetate_UR	11174894	1.1e-05	0.144877	UR	414	1	11174894	11174894
11	NA	GLM	G7	SNP	Benzyl acetate_UR	48676	1.26e-05	0.143113	UR	NA	1	48676	48676
11	NA	GLM	MAF5	SNP	Benzyl acetate_UR	48676	1.26e-05	0.143113	UR	NA	1	48676	48676
5	NA	GLM	G7	SNP	Benzyl acetate_UR	4569645	1.33e-05	0.142363	UR	211	1	4569645	4569645
5	NA	GLM	MAF5	SNP	Benzyl acetate_UR	4569645	1.33e-05	0.142363	UR	211	1	4569645	4569645
1	9	GLM	MAF5	SNP	Benzyl acetate_UR	3761256	1.43e-05	0.165877	UR	112	2	3648137	4066843
1	9	GLM	G7	SNP	Benzyl acetate_UR	3721132	1.57e-05	0.164604	UR	111	1	3648137	4066843
5	NA	GLM	NA	SSR	Benzyl acetate_UR	30623190	1.62e-05	0.157272	UR	SSR	1	30623190	30623190
8	29	GLM	G7	SNP	Benzyl acetate_UR	7335517	1.62e-05	0.164157	UR	337	1	7268296	7486223
8	30	GLM	G7	SNP	Benzyl acetate_UR	7549715	1.75e-05	0.163117	UR	340	1	7549715	7831966
8	26	GLM	G7	SNP	Benzyl acetate_UR	6947597	1.77e-05	0.163018	UR	321	1	6533242	6978549
8	26	GLM	NA	SSR	Benzyl acetate_UR	6642710	1.93e-05	0.178086	UR	SSR	2	6533242	6978549
11	NA	GLM	NA	SSR	Benzyl acetate_UR	NA	3.17e-05	0.109332	UR	SSR	1	NA	NA
8	41	GLM	NA	SSR	Benzyl acetate_UR	17554502	4.45e-05	0.189897	UR	SSR	1	17506977	17644612
2	13	GLM	NA	SSR	Benzyl acetate_UR	1067092	6.62e-05	0.168826	UR	SSR	1	1065901	1181828
5	49	GLM	NA	SSR	Benzyl acetate_UR	28548687	8.26e-05	0.143832	UR	SSR	2	28530169	29395287
5	81	GLM	NA	SSR	Benzyl acetate_UR	37855532	0.000117	0.153029	UR	SSR	2	37076966	37549697
8	37	GLM	NA	SSR	Benzyl acetate_UR	15196137	0.000166	0.1363	UR	SSR	1	14444953	15439624
10	53	GLM	NA	SSR	Benzyl acetate_UR	20881693	0.000166	0.190943	UR	SSR	1	20868667	20968241
3	NA	GLM	NA	SSR	Benzyl acetate_UR	14462884	0.000173	0.140872	UR	SSR	1	14462884	14462884
11	NA	GLM	NA	SSR	Benzyl acetate_UR	NA	0.000192	0.138677	UR	SSR	1	NA	NA
9	33	GLM	NA	SSR	Benzyl acetate_UR	23834484	0.000237	0.197231	UR	SSR	1	23101222	23892356
7	24	GLM	MAF5	SNP	Cis ocimene + ethyl hexanoate_UR	5607833	3.73e-12	0.348122	UR	220	4	5596523	5648293
7	NA	GLM	MAF5	SNP	Cis ocimene + ethyl hexanoate_UR	5359388	3.16e-11	0.32507	UR	212	1	5359388	5359388
7	23	GLM	MAF5	SNP	Cis ocimene + ethyl hexanoate_UR	5508567	4.73e-11	0.320623	UR	216	3	5508489	5509061
7	21	GLM	MAF5	SNP	Cis ocimene + ethyl hexanoate_UR	4831886	6.24e-11	0.31756	UR	199	2	4824487	4831886
7	NA	GLM	MAF5	SNP	Cis ocimene + ethyl hexanoate_UR	5316380	1.85e-10	0.305364	UR	210	1	5316380	5316380
7	24	MLM	MAF5	SNP	Cis ocimene + ethyl hexanoate_UR	5607833	6.68e-09	0.262347	UR	220	4	5596523	5648293
7	NA	GLM	MAF5	SNP	Cis ocimene + ethyl hexanoate_UR	4747857	6.81e-09	0.263442	UR	195	1	4747857	4747857
7	NA	GLM	MAF5	SNP	Cis ocimene + ethyl hexanoate_UR	4776442	7.02e-09	0.26308	UR	196	1	4776442	4776442
7	NA	MLM	MAF5	SNP	Cis ocimene + ethyl hexanoate_UR	5359388	2.39e-08	0.247802	UR	212	1	5359388	5359388
7	23	MLM	MAF5	SNP	Cis ocimene + ethyl hexanoate_UR	5508567	2.71e-08	0.246993	UR	216	3	5508489	5509061
7	21	MLM	MAF5	SNP	Cis ocimene + ethyl hexanoate_UR	4831886	4.66e-08	0.238335	UR	199	1	4824487	4831886
7	NA	MLM	MAF5	SNP	Cis ocimene + ethyl hexanoate_UR	4747857	6.75e-08	0.234967	UR	195	1	4747857	4747857
7	NA	MLM	MAF5	SNP	Cis ocimene + ethyl hexanoate_UR	5316380	7.25e-08	0.233059	UR	210	1	5316380	5316380
7	NA	MLM	MAF5	SNP	Cis ocimene + ethyl hexanoate_UR	4776442	7.62e-08	0.233618	UR	196	1	4776442	4776442
2	67	GLM	G7	SNP	Cis ocimene + ethyl hexanoate_UR	34359129	1.26e-07	0.227703	UR	629	7	34154799	35230857
2	67	GLM	MAF5	SNP	Cis ocimene + ethyl hexanoate_UR	34359129	1.26e-07	0.227703	UR	629	5	34154799	35230857
2	NA	GLM	G7	SNP	Cis ocimene + ethyl hexanoate_UR	18134057	3.54e-07	0.214564	UR	483	1	18134057	18134057
2	NA	GLM	MAF5	SNP	Cis ocimene + ethyl hexanoate_UR	18134057	3.54e-07	0.214564	UR	483	1	18134057	18134057
3	73	GLM	MAF5	SNP	Cis ocimene + ethyl hexanoate_UR	35859435	1.21e-06	0.198705	UR	758	2	35855119	35878999
3	54	GLM	MAF5	SNP	Cis ocimene + ethyl hexanoate_UR	30117744	2.41e-06	0.189669	UR	520	1	30011227	30243269
3	72	GLM	MAF5	SNP	Cis ocimene + ethyl hexanoate_UR	35843732	2.51e-06	0.189173	UR	754	1	35842629	35847669
9	NA	GLM	G7	SNP	Cis ocimene + ethyl hexanoate_UR	32646331	3.94e-06	0.158374	UR	537	1	32646331	32646331
9	NA	GLM	MAF5	SNP	Cis ocimene + ethyl hexanoate_UR	32646331	3.94e-06	0.158374	UR	537	1	32646331	32646331
2	66	GLM	G7	SNP	Cis ocimene + ethyl hexanoate_UR	34125561	5.41e-06	0.178965	UR	626	2	33974069	34154785
2	66	GLM	MAF5	SNP	Cis ocimene + ethyl hexanoate_UR	34125561	5.41e-06	0.178965	UR	626	2	33974069	34154785
2	36	GLM	G7	SNP	Cis ocimene + ethyl hexanoate_UR	7324500	6.46e-06	0.176586	UR	313	1	7324500	7617242
2	36	GLM	MAF5	SNP	Cis ocimene + ethyl hexanoate_UR	7324500	6.46e-06	0.176586	UR	313	1	7324500	7617242
3	69	GLM	G7	SNP	Cis ocimene + ethyl hexanoate_UR	35619473	6.9e-06	0.17571	UR	742	1	35617075	35720227
3	69	GLM	MAF5	SNP	Cis ocimene + ethyl hexanoate_UR	35619473	6.9e-06	0.17571	UR	742	1	35617075	35720227
2	84	GLM	MAF5	SNP	Cis ocimene + ethyl hexanoate_UR	41193736	7.52e-06	0.174562	UR	815	1	41181500	41193736
2	60	GLM	MAF5	SNP	Cis ocimene + ethyl hexanoate_UR	31542942	8.18e-06	0.173421	UR	589	1	31361092	31765090
2	NA	GLM	MAF5	SNP	Cis ocimene + ethyl hexanoate_UR	32229364	8.26e-06	0.173305	UR	600	1	32229364	32229364
2	57	GLM	G7	SNP	Cis ocimene + ethyl hexanoate_UR	29867634	1.04e-05	0.170175	UR	563	1	27852246	29867634
2	57	GLM	MAF5	SNP	Cis ocimene + ethyl hexanoate_UR	29867634	1.04e-05	0.170175	UR	563	1	27852246	29867634
2	35	GLM	G7	SNP	Cis ocimene + ethyl hexanoate_UR	6902555	1.26e-05	0.167613	UR	299	1	6579096	7156137
2	35	GLM	MAF5	SNP	Cis ocimene + ethyl hexanoate_UR	6902555	1.26e-05	0.167613	UR	299	1	6579096	7156137
2	NA	GLM	G7	SNP	Cis ocimene + ethyl hexanoate_UR	35313083	1.37e-05	0.16649	UR	648	1	35313083	35313083
2	NA	GLM	MAF5	SNP	Cis ocimene + ethyl hexanoate_UR	35313083	1.37e-05	0.16649	UR	648	1	35313083	35313083
9	14	GLM	NA	SSR	Cis ocimene + ethyl hexanoate_UR	3721559	1.58e-05	0.115754	UR	SSR	2	3143509	3836079
3	55	GLM	NA	SSR	Cis ocimene + ethyl hexanoate_UR	30620836	2.61e-05	0.129657	UR	SSR	1	30271279	30948946
2	36	GLM	NA	SSR	Cis ocimene + ethyl hexanoate_UR	7453377	5.5e-05	0.138901	UR	SSR	1	7324500	7617242
3	66	GLM	NA	SSR	Cis ocimene + ethyl hexanoate_UR	35287652	9.02e-05	0.0921966	UR	SSR	1	34866251	35290974
3	57	GLM	MAF5	SNP	Dodecanoate d'ethyle_R	31273182	6.6e-11	0.357429	R	579	5	31156760	31273833
4	NA	GLM	MAF5	SNP	Dodecanoate d'ethyle_R	15355500	9.85e-11	0.352561	R	203	1	15355500	15355500
3	55	GLM	MAF5	SNP	Dodecanoate d'ethyle_R	30508663	1.42e-10	0.348076	R	537	22	30271279	30948946
3	56	GLM	MAF5	SNP	Dodecanoate d'ethyle_R	31080756	1.68e-10	0.346013	R	568	2	31073768	31080756
3	NA	GLM	MAF5	SNP	Dodecanoate d'ethyle_R	31090298	1.94e-10	0.344221	R	569	1	31090298	31090298
9	4	GLM	MAF5	SNP	Dodecanoate d'ethyle_R	793296	2.05e-10	0.343532	R	33	2	713588	857818
3	54	GLM	MAF5	SNP	Dodecanoate d'ethyle_R	30233282	4.13e-10	0.334822	R	526	4	30011227	30243269
3	58	GLM	MAF5	SNP	Dodecanoate d'ethyle_R	31519307	7.06e-10	0.328056	R	589	2	31426718	31564785
2	53	GLM	MAF5	SNP	Dodecanoate d'ethyle_R	19902325	8.3e-10	0.325997	R	503	1	19631734	20486392
4	NA	GLM	MAF5	SNP	Dodecanoate d'ethyle_R	15412115	8.98e-10	0.324992	R	209	1	15412115	15412115
2	56	GLM	MAF5	SNP	Dodecanoate d'ethyle_R	24772909	2.07e-09	0.314304	R	532	5	23909636	27037630
5	NA	GLM	MAF5	SNP	Dodecanoate d'ethyle_R	20871680	2.14e-09	0.313845	R	329	1	20871680	20871680
10	26	GLM	G7	SNP	Dodecanoate d'ethyle_R	5228081	2.52e-09	0.311712	R	179	3	5153882	5419006
10	26	GLM	MAF5	SNP	Dodecanoate d'ethyle_R	5228081	2.52e-09	0.311712	R	179	3	5153882	5419006
2	55	GLM	MAF5	SNP	Dodecanoate d'ethyle_R	23034211	3.29e-09	0.308234	R	519	1	22102099	23107515
10	24	GLM	G7	SNP	Dodecanoate d'ethyle_R	4610049	3.39e-09	0.307866	R	164	3	4462717	4610049
10	24	GLM	MAF5	SNP	Dodecanoate d'ethyle_R	4610049	3.39e-09	0.307866	R	164	3	4462717	4610049
9	NA	GLM	MAF5	SNP	Dodecanoate d'ethyle_R	999623	4.17e-09	0.305152	R	39	1	999623	999623
2	45	GLM	MAF5	SNP	Dodecanoate d'ethyle_R	11011841	5.36e-09	0.301863	R	411	2	10827790	11023043
4	67	GLM	G7	SNP	Dodecanoate d'ethyle_R	29891425	1e-08	0.265292	R	NA	1	29641256	29939344
5	42	GLM	MAF5	SNP	Dodecanoate d'ethyle_R	26387398	1.06e-08	0.292767	R	382	4	24679572	27017453
10	19	GLM	MAF5	SNP	Dodecanoate d'ethyle_R	3979512	3.49e-08	0.276744	R	135	2	3968361	3998459
10	27	GLM	G7	SNP	Dodecanoate d'ethyle_R	6158785	4.6e-08	0.272944	R	188	6	6023982	6718126
10	27	GLM	MAF5	SNP	Dodecanoate d'ethyle_R	6158785	4.6e-08	0.272944	R	188	6	6023982	6718126
2	NA	GLM	G7	SNP	Dodecanoate d'ethyle_R	23504671	7.4e-08	0.266409	R	525	1	23504671	23504671
2	NA	GLM	MAF5	SNP	Dodecanoate d'ethyle_R	23504671	7.4e-08	0.266409	R	525	1	23504671	23504671
3	NA	GLM	MAF5	SNP	Dodecanoate d'ethyle_R	31150156	8.39e-08	0.26466	R	571	1	31150156	31150156
4	NA	GLM	MAF5	SNP	Dodecanoate d'ethyle_R	15388235	9.1e-08	0.263532	R	207	1	15388235	15388235
3	NA	GLM	MAF5	SNP	Dodecanoate d'ethyle_R	31597722	9.56e-08	0.262846	R	592	1	31597722	31597722
9	4	MLM	MAF5	SNP	Dodecanoate d'ethyle_R	793296	1.74e-07	0.259312	R	33	1	713588	857818
2	54	GLM	MAF5	SNP	Dodecanoate d'ethyle_R	21605892	1.91e-07	0.253144	R	511	1	21605859	21605892
6	2	GLM	G7	SNP	Dodecanoate d'ethyle_R	590130	2.73e-07	0.248112	R	18	2	277517	655187
6	2	GLM	MAF5	SNP	Dodecanoate d'ethyle_R	590130	2.73e-07	0.248112	R	18	2	277517	655187
2	57	GLM	MAF5	SNP	Dodecanoate d'ethyle_R	28827440	3.37e-07	0.24513	R	555	2	27852246	29867634
6	3	GLM	G7	SNP	Dodecanoate d'ethyle_R	663825	3.54e-07	0.244416	R	21	1	663825	665967
6	3	GLM	MAF5	SNP	Dodecanoate d'ethyle_R	663825	3.54e-07	0.244416	R	21	1	663825	665967
10	25	GLM	G7	SNP	Dodecanoate d'ethyle_R	5053844	3.59e-07	0.244229	R	172	2	5047729	5053844
10	25	GLM	MAF5	SNP	Dodecanoate d'ethyle_R	5053844	3.59e-07	0.244229	R	172	2	5047729	5053844
9	NA	GLM	MAF5	SNP	Dodecanoate d'ethyle_R	662500	3.78e-07	0.243492	R	27	1	662500	662500
1	28	GLM	G7	SNP	Dodecanoate d'ethyle_R	8557657	6.97e-07	0.234694	R	260	1	8510583	8805066
1	28	GLM	MAF5	SNP	Dodecanoate d'ethyle_R	8557657	6.97e-07	0.234694	R	260	1	8510583	8805066
2	53	MLM	MAF5	SNP	Dodecanoate d'ethyle_R	19902325	7.17e-07	0.23815	R	503	1	19631734	20486392
4	71	GLM	G7	SNP	Dodecanoate d'ethyle_R	30662924	8.27e-07	0.203949	R	NA	1	30406710	30965982
10	15	GLM	G7	SNP	Dodecanoate d'ethyle_R	3593240	9.59e-07	0.230074	R	111	1	3483824	3629707
10	15	GLM	MAF5	SNP	Dodecanoate d'ethyle_R	3593240	9.59e-07	0.230074	R	111	1	3483824	3629707
3	54	MLM	MAF5	SNP	Dodecanoate d'ethyle_R	30243269	1.38e-06	0.227724	R	527	3	30011227	30243269
3	55	GLM	G7	SNP	Dodecanoate d'ethyle_R	30637364	1.6e-06	0.222587	R	546	1	30271279	30948946
3	NA	GLM	NA	SSR	Dodecanoate d'ethyle_R	14462884	1.7e-06	0.227437	R	SSR	1	14462884	14462884
1	26	GLM	G7	SNP	Dodecanoate d'ethyle_R	7472814	1.76e-06	0.221172	R	238	6	6834165	7942921
1	26	GLM	MAF5	SNP	Dodecanoate d'ethyle_R	7472814	1.76e-06	0.221172	R	238	4	6834165	7942921
3	57	MLM	MAF5	SNP	Dodecanoate d'ethyle_R	31273182	1.76e-06	0.225231	R	579	2	31156760	31273833
2	58	GLM	MAF5	SNP	Dodecanoate d'ethyle_R	30300659	2.2e-06	0.217908	R	570	2	29884879	30487524
1	56	GLM	MAF5	SNP	Dodecanoate d'ethyle_R	27743259	2.3e-06	0.217249	R	522	1	27743259	27743274
4	NA	MLM	MAF5	SNP	Dodecanoate d'ethyle_R	15355500	2.5e-06	0.220243	R	203	1	15355500	15355500
5	NA	MLM	MAF5	SNP	Dodecanoate d'ethyle_R	20871680	2.63e-06	0.219144	R	329	1	20871680	20871680
10	29	GLM	G7	SNP	Dodecanoate d'ethyle_R	7361221	2.72e-06	0.214762	R	201	2	7296608	7879432
10	29	GLM	MAF5	SNP	Dodecanoate d'ethyle_R	7361221	2.72e-06	0.214762	R	201	2	7296608	7879432
2	56	MLM	MAF5	SNP	Dodecanoate d'ethyle_R	24772909	2.74e-06	0.218942	R	532	1	23909636	27037630
3	55	MLM	MAF5	SNP	Dodecanoate d'ethyle_R	30508663	3.1e-06	0.216477	R	537	3	30271279	30948946
4	51	GLM	G7	SNP	Dodecanoate d'ethyle_R	26906631	3.13e-06	0.184569	R	NA	1	26703951	27146370
2	NA	GLM	G7	SNP	Dodecanoate d'ethyle_R	23613002	4.1e-06	0.208691	R	526	1	23613002	23613002
2	NA	GLM	MAF5	SNP	Dodecanoate d'ethyle_R	23613002	4.1e-06	0.208691	R	526	1	23613002	23613002
10	NA	GLM	G7	SNP	Dodecanoate d'ethyle_R	5581868	4.23e-06	0.208201	R	184	1	5581868	5581868
10	NA	GLM	MAF5	SNP	Dodecanoate d'ethyle_R	5581868	4.23e-06	0.208201	R	184	1	5581868	5581868
4	65	GLM	G7	SNP	Dodecanoate d'ethyle_R	29415667	4.73e-06	0.178511	R	NA	5	28951105	29493076
4	NA	GLM	G7	SNP	Dodecanoate d'ethyle_R	29606263	4.73e-06	0.178511	R	NA	1	29606263	29606263
9	24	GLM	MAF5	SNP	Dodecanoate d'ethyle_R	6907190	5.59e-06	0.204046	R	279	2	6851452	7232130
3	56	MLM	MAF5	SNP	Dodecanoate d'ethyle_R	31080756	6.81e-06	0.204994	R	568	2	31073768	31080756
8	NA	GLM	G7	SNP	Dodecanoate d'ethyle_R	9840784	6.99e-06	0.172717	R	NA	1	9840784	9840784
2	NA	GLM	MAF5	SNP	Dodecanoate d'ethyle_R	38689335	7.59e-06	0.199433	R	717	1	38689335	38689335
1	NA	GLM	G7	SNP	Dodecanoate d'ethyle_R	2724496	9.46e-06	0.168214	R	NA	1	2724496	2724496
1	6	GLM	G7	SNP	Dodecanoate d'ethyle_R	2793283	9.46e-06	0.168214	R	NA	1	2678044	2829157
1	NA	GLM	G7	SNP	Dodecanoate d'ethyle_R	2853992	9.46e-06	0.168214	R	NA	1	2853992	2853992
10	NA	GLM	G7	SNP	Dodecanoate d'ethyle_R	4899660	9.58e-06	0.19591	R	168	1	4899660	4899660
10	NA	GLM	MAF5	SNP	Dodecanoate d'ethyle_R	4899660	9.58e-06	0.19591	R	168	1	4899660	4899660
5	6	GLM	G7	SNP	Dodecanoate d'ethyle_R	815933	1.04e-05	0.194671	R	39	1	815933	869509
5	6	GLM	MAF5	SNP	Dodecanoate d'ethyle_R	815933	1.04e-05	0.194671	R	39	1	815933	869509
8	37	GLM	G7	SNP	Dodecanoate d'ethyle_R	14668095	1.06e-05	0.166461	R	NA	1	14444953	15439624
1	17	GLM	MAF5	SNP	Dodecanoate d'ethyle_R	5077411	1.08e-05	0.194026	R	165	4	4973179	5305096
9	NA	MLM	MAF5	SNP	Dodecanoate d'ethyle_R	999623	1.14e-05	0.19726	R	39	1	999623	999623
3	NA	MLM	MAF5	SNP	Dodecanoate d'ethyle_R	31090298	1.16e-05	0.196943	R	569	1	31090298	31090298
2	55	MLM	MAF5	SNP	Dodecanoate d'ethyle_R	23034211	1.37e-05	0.194331	R	519	1	22102099	23107515
4	NA	MLM	MAF5	SNP	Dodecanoate d'ethyle_R	15412115	1.44e-05	0.193961	R	209	1	15412115	15412115
10	NA	GLM	G7	SNP	Dodecanoate d'ethyle_R	5605104	1.61e-05	0.188001	R	185	1	5605104	5605104
4	73	GLM	G7	SNP	Dodecanoate d'ethyle_R	31366888	1.65e-05	0.159906	R	NA	1	31245987	31391851
4	74	GLM	G7	SNP	Dodecanoate d'ethyle_R	31743145	1.65e-05	0.159906	R	NA	1	31640263	31862741
1	10	GLM	G7	SNP	Dodecanoate d'ethyle_R	4134570	1.72e-05	0.187003	R	125	1	4114978	4134570
9	20	MLM	G7	SNP	Dodecanoate d'ethyle_R	5757910	1.92e-05	0.16274	R	NA	1	5327028	6165415
6	NA	GLM	NA	SSR	Dodecanoate d'ethyle_R	218625	2.63e-05	0.177647	R	SSR	1	218625	218625
2	36	GLM	NA	SSR	Dodecanoate d'ethyle_R	7453377	3.01e-05	0.167877	R	SSR	1	7324500	7617242
2	39	GLM	NA	SSR	Dodecanoate d'ethyle_R	8389914	3.06e-05	0.164153	R	SSR	1	8239972	8416672
1	26	GLM	NA	SSR	Dodecanoate d'ethyle_R	7541990	0.000268	0.119692	R	SSR	1	6834165	7942921
1	23	GLM	MAF5	SNP	Epoxylinalol_R	6448063	3.23e-11	0.324829	R	210	9	6381788	6674915
1	26	GLM	G7	SNP	Epoxylinalol_R	7081063	1.2e-10	0.310255	R	230	8	6834165	7942921
1	26	GLM	MAF5	SNP	Epoxylinalol_R	7081063	1.2e-10	0.310255	R	230	8	6834165	7942921
1	23	GLM	G7	SNP	Epoxylinalol_R	6614869	3.07e-10	0.299662	R	214	6	6381788	6674915
1	25	GLM	G7	SNP	Epoxylinalol_R	6834137	3.08e-10	0.299616	R	226	2	6827616	6834137
1	25	GLM	MAF5	SNP	Epoxylinalol_R	6834137	3.08e-10	0.299616	R	226	2	6827616	6834137
3	NA	GLM	MAF5	SNP	Epoxylinalol_R	35412158	6.54e-09	0.263921	R	729	1	35412158	35412158
1	26	MLM	MAF5	SNP	Epoxylinalol_R	7081063	9.6e-09	0.263073	R	230	5	6834165	7942921
1	23	MLM	MAF5	SNP	Epoxylinalol_R	6448063	1.57e-08	0.256577	R	210	5	6381788	6674915
9	33	GLM	MAF5	SNP	Epoxylinalol_R	23302911	2.3e-08	0.248704	R	419	3	23101222	23892356
1	26	MLM	G7	SNP	Epoxylinalol_R	7081063	2.48e-08	0.25009	R	230	5	6834165	7942921
1	9	GLM	G7	SNP	Epoxylinalol_R	3868129	3.52e-08	0.243492	R	114	6	3648137	4066843
1	9	GLM	MAF5	SNP	Epoxylinalol_R	3868129	3.52e-08	0.243492	R	114	6	3648137	4066843
10	26	GLM	G7	SNP	Epoxylinalol_R	5308832	4.75e-08	0.239815	R	182	2	5153882	5419006
10	26	GLM	MAF5	SNP	Epoxylinalol_R	5308832	4.75e-08	0.239815	R	182	2	5153882	5419006
1	25	MLM	MAF5	SNP	Epoxylinalol_R	6834137	5.02e-08	0.243161	R	226	1	6827616	6834137
1	21	GLM	G7	SNP	Epoxylinalol_R	6130253	9.65e-08	0.230992	R	199	3	5940526	6204028
1	21	GLM	MAF5	SNP	Epoxylinalol_R	6130253	9.65e-08	0.230992	R	199	7	5940526	6204028
1	25	MLM	G7	SNP	Epoxylinalol_R	6834137	1.23e-07	0.230605	R	226	1	6827616	6834137
1	7	GLM	G7	SNP	Epoxylinalol_R	3379361	1.64e-07	0.224314	R	100	11	3083032	3398183
1	7	GLM	MAF5	SNP	Epoxylinalol_R	3379361	1.64e-07	0.224314	R	100	11	3083032	3398183
1	10	GLM	G7	SNP	Epoxylinalol_R	4131970	2.66e-07	0.21822	R	124	2	4114978	4134570
1	10	GLM	MAF5	SNP	Epoxylinalol_R	4131970	2.66e-07	0.21822	R	124	2	4114978	4134570
1	12	GLM	G7	SNP	Epoxylinalol_R	4226176	3e-07	0.216672	R	134	2	4171635	4226176
1	12	GLM	MAF5	SNP	Epoxylinalol_R	4226176	3e-07	0.216672	R	134	2	4171635	4226176
1	13	GLM	G7	SNP	Epoxylinalol_R	4277169	3e-07	0.216672	R	137	3	4277169	4495991
1	13	GLM	MAF5	SNP	Epoxylinalol_R	4277169	3e-07	0.216672	R	137	3	4277169	4495991
1	23	MLM	G7	SNP	Epoxylinalol_R	6614869	4.02e-07	0.215661	R	214	1	6381788	6674915
5	NA	GLM	MAF5	SNP	Epoxylinalol_R	22972226	7.76e-07	0.204478	R	344	1	22972226	22972226
1	22	GLM	MAF5	SNP	Epoxylinalol_R	6309593	8.43e-07	0.203417	R	206	1	6248007	6310517
1	4	GLM	G7	SNP	Epoxylinalol_R	2368915	8.55e-07	0.203225	R	68	3	805132	2445782
1	4	GLM	MAF5	SNP	Epoxylinalol_R	2368915	8.55e-07	0.203225	R	68	3	805132	2445782
9	10	GLM	MAF5	SNP	Epoxylinalol_R	1548388	8.82e-07	0.202825	R	67	1	1537448	2208503
11	NA	GLM	G7	SNP	Epoxylinalol_R	34818	1.14e-06	0.199489	R	NA	1	34818	34818
11	NA	GLM	MAF5	SNP	Epoxylinalol_R	34818	1.14e-06	0.199489	R	NA	1	34818	34818
1	NA	GLM	G7	SNP	Epoxylinalol_R	4667668	1.32e-06	0.19761	R	152	1	4667668	4667668
1	NA	GLM	MAF5	SNP	Epoxylinalol_R	4667668	1.32e-06	0.19761	R	152	1	4667668	4667668
1	19	GLM	MAF5	SNP	Epoxylinalol_R	5859617	1.49e-06	0.196036	R	184	1	5859617	5864417
1	16	GLM	MAF5	SNP	Epoxylinalol_R	4761778	1.61e-06	0.194999	R	155	4	4668890	4875804
1	4	GLM	MAF5	SNP	Epoxylinalol_R	2430002	1.78e-06	0.193644	R	70	2	805132	2445782
3	NA	GLM	MAF5	SNP	Epoxylinalol_R	27006470	2.13e-06	0.191336	R	389	1	27006470	27006470
3	NA	MLM	MAF5	SNP	Epoxylinalol_R	35412158	2.28e-06	0.194134	R	729	1	35412158	35412158
1	14	GLM	G7	SNP	Epoxylinalol_R	4498932	2.72e-06	0.188086	R	144	1	4498874	4528589
1	14	GLM	MAF5	SNP	Epoxylinalol_R	4498932	2.72e-06	0.188086	R	144	1	4498874	4528589
1	16	GLM	G7	SNP	Epoxylinalol_R	4773526	2.73e-06	0.188044	R	156	1	4668890	4875804
6	58	GLM	G7	SNP	Epoxylinalol_R	23097785	2.92e-06	0.187142	R	445	1	23097785	23108368
6	58	GLM	MAF5	SNP	Epoxylinalol_R	23097785	2.92e-06	0.187142	R	445	1	23097785	23108368
1	NA	GLM	MAF5	SNP	Epoxylinalol_R	5323693	3.43e-06	0.185035	R	168	1	5323693	5323693
1	17	GLM	MAF5	SNP	Epoxylinalol_R	4991010	3.44e-06	0.184981	R	163	1	4973179	5305096
1	18	GLM	MAF5	SNP	Epoxylinalol_R	5551864	3.94e-06	0.183178	R	174	2	5356899	5820933
9	NA	GLM	G7	SNP	Epoxylinalol_R	649739	4.46e-06	0.181536	R	26	1	649739	649739
9	NA	GLM	MAF5	SNP	Epoxylinalol_R	649739	4.46e-06	0.181536	R	26	1	649739	649739
4	NA	MLM	MAF5	SNP	Epoxylinalol_R	21800929	5.41e-06	0.157588	R	307	1	21800929	21800929
1	6	GLM	G7	SNP	Epoxylinalol_R	2793273	5.49e-06	0.178759	R	79	3	2678044	2829157
1	6	GLM	MAF5	SNP	Epoxylinalol_R	2793273	5.49e-06	0.178759	R	79	2	2678044	2829157
1	18	GLM	G7	SNP	Epoxylinalol_R	5554540	5.53e-06	0.178665	R	175	1	5356899	5820933
6	65	GLM	G7	SNP	Epoxylinalol_R	25201654	6.36e-06	0.176797	R	506	1	25201654	25545192
6	65	GLM	MAF5	SNP	Epoxylinalol_R	25201654	6.36e-06	0.176797	R	506	1	25201654	25545192
10	26	MLM	MAF5	SNP	Epoxylinalol_R	5308832	6.92e-06	0.180062	R	182	1	5153882	5419006
1	NA	GLM	G7	SNP	Epoxylinalol_R	87133	7.14e-06	0.175262	R	2	1	87133	87133
1	NA	GLM	MAF5	SNP	Epoxylinalol_R	87133	7.14e-06	0.175262	R	2	1	87133	87133
1	NA	GLM	G7	SNP	Epoxylinalol_R	4931650	7.38e-06	0.174816	R	161	1	4931650	4931650
1	NA	GLM	MAF5	SNP	Epoxylinalol_R	4931650	7.38e-06	0.174816	R	161	1	4931650	4931650
4	NA	GLM	G7	SNP	Epoxylinalol_R	21800929	7.54e-06	0.149851	R	307	1	21800929	21800929
4	NA	GLM	MAF5	SNP	Epoxylinalol_R	21800929	7.54e-06	0.149851	R	307	1	21800929	21800929
5	56	GLM	G7	SNP	Epoxylinalol_R	30471918	8.98e-06	0.172172	R	516	1	30407214	30473075
5	56	GLM	MAF5	SNP	Epoxylinalol_R	30471918	8.98e-06	0.172172	R	516	1	30407214	30473075
1	21	MLM	MAF5	SNP	Epoxylinalol_R	5940526	9.19e-06	0.175771	R	192	2	5940526	6204028
1	9	MLM	MAF5	SNP	Epoxylinalol_R	3868129	9.23e-06	0.175305	R	114	1	3648137	4066843
4	NA	GLM	G7	SNP	Epoxylinalol_R	21809511	9.6e-06	0.146668	R	309	1	21809511	21809511
4	NA	GLM	MAF5	SNP	Epoxylinalol_R	21809511	9.6e-06	0.146668	R	309	1	21809511	21809511
1	NA	GLM	G7	SNP	Epoxylinalol_R	5836703	1.01e-05	0.170611	R	183	1	5836703	5836703
1	NA	GLM	MAF5	SNP	Epoxylinalol_R	5836703	1.01e-05	0.170611	R	183	1	5836703	5836703
7	13	MLM	G7	SNP	Epoxylinalol_R	2991157	1.01e-05	0.171486	R	130	1	2975385	3095657
9	33	MLM	MAF5	SNP	Epoxylinalol_R	23302911	1.06e-05	0.174346	R	419	1	23101222	23892356
4	NA	GLM	G7	SNP	Epoxylinalol_R	21773964	1.15e-05	0.1443	R	305	1	21773964	21773964
4	NA	GLM	MAF5	SNP	Epoxylinalol_R	21773964	1.15e-05	0.1443	R	305	1	21773964	21773964
6	NA	GLM	G7	SNP	Epoxylinalol_R	23150153	1.23e-05	0.167881	R	447	1	23150153	23150153
6	NA	GLM	MAF5	SNP	Epoxylinalol_R	23150153	1.23e-05	0.167881	R	447	1	23150153	23150153
6	64	GLM	G7	SNP	Epoxylinalol_R	23951451	1.33e-05	0.166824	R	481	1	23913803	25147021
6	64	GLM	MAF5	SNP	Epoxylinalol_R	23951451	1.33e-05	0.166824	R	481	1	23913803	25147021
1	NA	GLM	G7	SNP	Epoxylinalol_R	4158845	1.39e-05	0.166282	R	128	1	4158845	4158845
1	NA	GLM	MAF5	SNP	Epoxylinalol_R	4158845	1.39e-05	0.166282	R	128	1	4158845	4158845
1	5	GLM	G7	SNP	Epoxylinalol_R	2496458	1.48e-05	0.165385	R	75	1	2484281	2532862
1	5	GLM	MAF5	SNP	Epoxylinalol_R	2496458	1.48e-05	0.165385	R	75	1	2484281	2532862
9	4	GLM	G7	SNP	Epoxylinalol_R	749365	1.58e-05	0.164534	R	30	1	713588	857818
9	4	GLM	MAF5	SNP	Epoxylinalol_R	749365	1.58e-05	0.164534	R	30	1	713588	857818
1	3	GLM	G7	SNP	Epoxylinalol_R	606037	1.65e-05	0.163959	R	23	1	588709	750219
1	2	GLM	G7	SNP	Epoxylinalol_R	347337	1.66e-05	0.163858	R	13	1	311606	555162
4	NA	MLM	G7	SNP	Epoxylinalol_R	21800929	1.67e-05	0.141887	R	307	1	21800929	21800929
4	39	GLM	G7	SNP	Epoxylinalol_R	23199282	1.92e-05	0.137508	R	348	1	22671107	23365683
6	47	GLM	G7	SNP	Epoxylinalol_R	21525718	1.99e-05	0.161382	R	366	1	21458845	21577257
5	45	MLM	MAF5	SNP	Ethyl benzoate_UR	27513744	2.33e-06	0.179096	UR	417	1	27513741	28030599
5	45	GLM	MAF5	SNP	Ethyl benzoate_UR	27513744	9.98e-06	0.170751	UR	417	1	27513741	28030599
6	NA	GLM	G7	SNP	Ethyl benzoate_UR	1342877	1.12e-05	0.16919	UR	34	1	1342877	1342877
6	NA	GLM	MAF5	SNP	Ethyl benzoate_UR	1342877	1.12e-05	0.16919	UR	34	1	1342877	1342877
9	17	MLM	MAF5	SNP	Floral-Barkwoody	4248470	6.56e-06	0.150863	R	166	1	4071956	4749406
6	NA	MLM	G7	SNP	Floral-Darkwood	26160073	5.78e-06	0.132969	R	NA	1	26160073	26160073
9	21	MLM	MAF5	SNP	Floral-Greenvegetative	6245108	7.45e-09	0.231736	R	261	1	6199486	6338993
9	20	MLM	MAF5	SNP	Floral-Greenvegetative	6010658	1.5e-06	0.172179	R	248	1	5327028	6165415
4	52	MLM	MAF5	SNP	Floral-Greenvegetative	27229206	3.97e-06	0.160798	R	483	1	27221085	27271786
8	NA	MLM	MAF5	SNP	Floral-Greenvegetative	9726086	9.25e-06	0.150734	R	372	1	9726086	9726086
1	10	MLM	MAF5	SNP	Floral-Lightwood	4129759	2.56e-06	0.160624	R	123	1	4114978	4134570
1	7	MLM	G7	SNP	Floral-Lightwood	3363551	5.71e-06	0.154552	R	98	4	3083032	3398183
1	NA	MLM	MAF5	SNP	Floral-Lightwood	4079457	6.72e-06	0.148382	R	120	1	4079457	4079457
1	9	MLM	MAF5	SNP	Floral-Lightwood	3721054	1.5e-05	0.137585	R	110	2	3648137	4066843
9	58	MLM	MAF5	SNP	Floral-Mushrooms	38188583	1.57e-08	0.216079	R	701	1	38121367	38300579
8	37	GLM	NA	SSR	Floral-OrangeBlossom	15196137	0.000132	0.122036	R	SSR	1	14444953	15439624
1	NA	MLM	MAF5	SNP	Floral-Otherspice	4079457	1.45e-05	0.143661	R	120	1	4079457	4079457
2	NA	MLM	G7	SNP	Floral-Peppery	3606270	9.42e-07	0.150247	R	NA	1	3606270	3606270
2	NA	MLM	G7	SNP	Floral-Peppery	3934113	1.24e-06	0.147251	R	195	1	3934113	3934113
2	25	MLM	G7	SNP	Floral-Peppery	3588621	1.9e-06	0.142496	R	NA	1	3259782	3596798
2	NA	MLM	G7	SNP	Floral-Peppery	3893531	3.68e-06	0.135102	R	192	1	3893531	3893531
2	NA	MLM	MAF5	SNP	Floral-Peppery	3934113	7.44e-06	0.128152	R	195	1	3934113	3934113
2	36	MLM	MAF5	SNP	Floral-Perfume	7476546	1.87e-09	0.244325	R	319	2	7324500	7617242
2	NA	MLM	MAF5	SNP	Floral-Perfume	7220973	2.9e-09	0.239679	R	307	1	7220973	7220973
2	NA	MLM	MAF5	SNP	Floral-Perfume	7283164	3.79e-09	0.236856	R	309	1	7283164	7283164
2	NA	MLM	MAF5	SNP	Floral-Perfume	7321355	3.91e-09	0.236541	R	312	1	7321355	7321355
10	NA	MLM	MAF5	SNP	Floral-Perfume	19571067	5.92e-08	0.207147	R	352	1	19571067	19571067
4	57	MLM	MAF5	SNP	Floral-Perfume	28045999	7.96e-08	0.203865	R	521	1	28045777	28046031
2	38	MLM	MAF5	SNP	Floral-Perfume	8236781	2.99e-07	0.189079	R	350	1	8216923	8236790
3	36	MLM	MAF5	SNP	Floral-Perfume	25877933	3.42e-07	0.18756	R	326	1	25853075	25877933
2	49	MLM	MAF5	SNP	Floral-Perfume	14876966	1.46e-06	0.170942	R	451	3	14191541	16656118
2	47	MLM	MAF5	SNP	Floral-Perfume	12427061	1.98e-06	0.167452	R	434	1	11993049	13159953
2	45	MLM	MAF5	SNP	Floral-Perfume	10959323	2.21e-06	0.166191	R	410	1	10827790	11023043
2	35	MLM	MAF5	SNP	Floral-Perfume	7156137	6.63e-06	0.153327	R	302	1	6579096	7156137
4	55	MLM	MAF5	SNP	Floral-Perfume	27507597	8.31e-06	0.150659	R	504	1	27507597	27608727
1	10	MLM	MAF5	SNP	Floral-Tobacco	4131970	4.52e-06	0.155935	R	124	2	4114978	4134570
6	45	MLM	G7	SNP	Floral-woodresin	21137437	8.74e-07	0.150888	R	353	1	21137437	21139646
6	45	MLM	MAF5	SNP	Floral-woodresin	21137437	1.45e-06	0.142964	R	353	1	21137437	21139646
9	32	MLM	MAF5	SNP	Floral-woodresin	23025561	4.61e-06	0.156831	R	414	1	23025539	23025561
4	19	MLM	MAF5	SNP	Floral-woodresin	3265852	5.52e-06	0.154739	R	116	1	3184109	3655488
8	23	MLM	MAF5	SNP	Floral-woodresin	5900260	5.71e-06	0.15433	R	288	1	5827219	5900260
8	3	MLM	MAF5	SNP	Floral-woodresin	1148435	5.72e-06	0.15432	R	49	1	1121979	1520555
7	NA	GLM	MAF5	SNP	Furfural_UR	4776442	3.7e-08	0.242897	UR	196	1	4776442	4776442
7	NA	GLM	MAF5	SNP	Furfural_UR	4747857	4.82e-08	0.239638	UR	195	1	4747857	4747857
7	24	GLM	MAF5	SNP	Furfural_UR	5607833	5.43e-08	0.23816	UR	220	4	5596523	5648293
7	NA	MLM	MAF5	SNP	Furfural_UR	4776442	1.31e-07	0.227772	UR	196	1	4776442	4776442
7	23	GLM	MAF5	SNP	Furfural_UR	5508489	1.55e-07	0.22508	UR	215	2	5508489	5509061
7	NA	GLM	MAF5	SNP	Furfural_UR	5359388	1.69e-07	0.223974	UR	212	1	5359388	5359388
7	NA	MLM	MAF5	SNP	Furfural_UR	4747857	2.08e-07	0.221703	UR	195	1	4747857	4747857
7	24	MLM	MAF5	SNP	Furfural_UR	5607833	6.86e-07	0.208422	UR	220	4	5596523	5648293
7	23	MLM	MAF5	SNP	Furfural_UR	5508489	2.03e-06	0.194217	UR	215	2	5508489	5509061
7	NA	MLM	MAF5	SNP	Furfural_UR	5359388	2.44e-06	0.19189	UR	212	1	5359388	5359388
9	14	GLM	NA	SSR	Furfural_UR	3721559	6.79e-06	0.125114	UR	SSR	2	3143509	3836079
6	NA	GLM	NA	SSR	Furfural_UR	218625	6.97e-05	0.14171	UR	SSR	1	218625	218625
10	26	GLM	G7	SNP	Furfural_R	5308832	3.15e-07	0.22083	R	182	2	5153882	5419006
10	26	GLM	MAF5	SNP	Furfural_R	5308832	3.15e-07	0.22083	R	182	2	5153882	5419006
10	25	GLM	G7	SNP	Furfural_R	5053844	3.97e-07	0.217803	R	172	1	5047729	5053844
10	25	GLM	MAF5	SNP	Furfural_R	5053844	3.97e-07	0.217803	R	172	1	5047729	5053844
10	26	MLM	MAF5	SNP	Furfural_R	5308832	7.03e-07	0.211887	R	182	2	5153882	5419006
1	7	GLM	G7	SNP	Furfural_R	3379361	1.34e-06	0.201822	R	100	4	3083032	3398183
1	7	GLM	MAF5	SNP	Furfural_R	3379361	1.34e-06	0.201822	R	100	4	3083032	3398183
3	NA	GLM	MAF5	SNP	Furfural_R	27006470	1.96e-06	0.196728	R	389	1	27006470	27006470
1	26	MLM	MAF5	SNP	Furfural_R	6855567	3.15e-06	0.192694	R	228	2	6834165	7942921
1	4	GLM	G7	SNP	Furfural_R	1747542	4.21e-06	0.186407	R	59	9	805132	2445782
1	4	GLM	MAF5	SNP	Furfural_R	1747542	4.21e-06	0.186407	R	59	8	805132	2445782
10	26	MLM	G7	SNP	Furfural_R	5308832	5.03e-06	0.182509	R	182	3	5153882	5419006
1	26	GLM	G7	SNP	Furfural_R	7081063	5.78e-06	0.182107	R	230	2	6834165	7942921
1	26	GLM	MAF5	SNP	Furfural_R	7081063	5.78e-06	0.182107	R	230	2	6834165	7942921
1	NA	GLM	G7	SNP	Furfural_R	3399842	6.77e-06	0.179945	R	103	1	3399842	3399842
1	NA	GLM	MAF5	SNP	Furfural_R	3399842	6.77e-06	0.179945	R	103	1	3399842	3399842
1	9	GLM	G7	SNP	Furfural_R	3940448	6.95e-06	0.179585	R	116	2	3648137	4066843
1	9	GLM	MAF5	SNP	Furfural_R	3940448	6.95e-06	0.179585	R	116	3	3648137	4066843
3	44	GLM	G7	SNP	Furfural_R	27344155	7.49e-06	0.178566	R	410	1	27183974	27696466
3	44	GLM	MAF5	SNP	Furfural_R	27344155	7.49e-06	0.178566	R	410	1	27183974	27696466
1	25	MLM	MAF5	SNP	Furfural_R	6834137	9.26e-06	0.178042	R	226	1	6827616	6834137
1	NA	GLM	G7	SNP	Furfural_R	803695	1.07e-05	0.173701	R	29	1	803695	803695
1	NA	GLM	MAF5	SNP	Furfural_R	803695	1.07e-05	0.173701	R	29	1	803695	803695
3	NA	GLM	MAF5	SNP	Furfural_R	35446132	1.38e-05	0.170203	R	734	1	35446132	35446132
10	25	MLM	MAF5	SNP	Furfural_R	5053844	1.39e-05	0.171939	R	172	1	5047729	5053844
10	15	GLM	G7	SNP	Furfural_R	3593240	1.51e-05	0.168947	R	111	1	3483824	3629707
10	15	GLM	MAF5	SNP	Furfural_R	3593240	1.51e-05	0.168947	R	111	1	3483824	3629707
1	7	MLM	MAF5	SNP	Furfural_R	3379361	1.54e-05	0.170919	R	100	2	3083032	3398183
1	2	GLM	G7	SNP	Furfural_R	347337	1.84e-05	0.166137	R	13	1	311606	555162
8	41	GLM	NA	SSR	Furfural_R	17554502	0.00012	0.17789	R	SSR	1	17506977	17644612
4	NA	GLM	MAF5	SNP	Guaiacol_UR	737310	1.6e-09	0.280565	UR	30	1	737310	737310
4	7	GLM	MAF5	SNP	Guaiacol_UR	947895	4.87e-09	0.267459	UR	40	4	929263	1050562
1	82	GLM	G7	SNP	Guaiacol_UR	34378926	2.19e-08	0.24934	UR	760	2	34339517	34392040
1	82	GLM	MAF5	SNP	Guaiacol_UR	34378926	2.19e-08	0.24934	UR	760	2	34339517	34392040
2	42	GLM	MAF5	SNP	Guaiacol_UR	8737902	2.32e-08	0.248604	UR	375	1	8719682	8881589
2	39	GLM	MAF5	SNP	Guaiacol_UR	8416672	3.91e-08	0.242215	UR	360	3	8239972	8416672
2	41	GLM	MAF5	SNP	Guaiacol_UR	8538581	4.58e-08	0.240271	UR	368	3	8526440	8616441
2	NA	GLM	MAF5	SNP	Guaiacol_UR	9961725	7.8e-08	0.233653	UR	389	1	9961725	9961725
2	35	GLM	MAF5	SNP	Guaiacol_UR	6579096	9.64e-08	0.231005	UR	283	5	6579096	7156137
1	NA	GLM	G7	SNP	Guaiacol_UR	34399566	1.28e-07	0.227498	UR	762	1	34399566	34399566
1	NA	GLM	MAF5	SNP	Guaiacol_UR	34399566	1.28e-07	0.227498	UR	762	1	34399566	34399566
1	36	GLM	G7	SNP	Guaiacol_UR	11756497	1.4e-07	0.20108	UR	NA	1	11617036	11945382
1	NA	GLM	MAF5	SNP	Guaiacol_UR	8290834	1.86e-07	0.222775	UR	256	1	8290834	8290834
5	45	GLM	MAF5	SNP	Guaiacol_UR	27778596	1.89e-07	0.222558	UR	422	3	27513741	28030599
2	NA	GLM	MAF5	SNP	Guaiacol_UR	6563399	2.11e-07	0.221124	UR	281	1	6563399	6563399
2	35	MLM	MAF5	SNP	Guaiacol_UR	6579096	2.95e-07	0.217944	UR	283	5	6579096	7156137
7	24	GLM	MAF5	SNP	Guaiacol_UR	5596523	2.99e-07	0.216743	UR	219	4	5596523	5648293
1	NA	GLM	MAF5	SNP	Guaiacol_UR	8382666	3.16e-07	0.21602	UR	257	1	8382666	8382666
2	39	MLM	MAF5	SNP	Guaiacol_UR	8416593	4.28e-07	0.213565	UR	359	3	8239972	8416672
3	69	GLM	G7	SNP	Guaiacol_UR	35617075	4.28e-07	0.212147	UR	741	2	35617075	35720227
3	69	GLM	MAF5	SNP	Guaiacol_UR	35617075	4.28e-07	0.212147	UR	741	2	35617075	35720227
3	NA	GLM	G7	SNP	Guaiacol_UR	35579837	4.8e-07	0.210663	UR	740	1	35579837	35579837
3	NA	GLM	MAF5	SNP	Guaiacol_UR	35579837	4.8e-07	0.210663	UR	740	1	35579837	35579837
2	42	MLM	MAF5	SNP	Guaiacol_UR	8737902	5.44e-07	0.210677	UR	375	1	8719682	8881589
7	23	GLM	MAF5	SNP	Guaiacol_UR	5508567	6.93e-07	0.205954	UR	216	2	5508489	5509061
2	41	MLM	MAF5	SNP	Guaiacol_UR	8538581	7.69e-07	0.20631	UR	368	3	8526440	8616441
7	NA	GLM	MAF5	SNP	Guaiacol_UR	5359388	7.7e-07	0.204578	UR	212	1	5359388	5359388
3	NA	GLM	MAF5	SNP	Guaiacol_UR	35461657	1.19e-06	0.198915	UR	736	1	35461657	35461657
1	NA	MLM	MAF5	SNP	Guaiacol_UR	8290834	1.47e-06	0.197451	UR	256	1	8290834	8290834
9	52	GLM	MAF5	SNP	Guaiacol_UR	35898199	1.48e-06	0.196124	UR	622	10	35661701	36679476
9	14	GLM	MAF5	SNP	Guaiacol_UR	3466999	1.49e-06	0.196044	UR	122	1	3143509	3836079
2	NA	MLM	MAF5	SNP	Guaiacol_UR	9961725	1.68e-06	0.196194	UR	389	1	9961725	9961725
1	NA	GLM	G7	SNP	Guaiacol_UR	30765176	1.72e-06	0.194143	UR	610	1	30765176	30765176
1	NA	GLM	MAF5	SNP	Guaiacol_UR	30765176	1.72e-06	0.194143	UR	610	1	30765176	30765176
2	NA	MLM	MAF5	SNP	Guaiacol_UR	6563399	1.83e-06	0.19493	UR	281	1	6563399	6563399
7	NA	GLM	MAF5	SNP	Guaiacol_UR	4747857	2.06e-06	0.191749	UR	195	1	4747857	4747857
5	45	GLM	G7	SNP	Guaiacol_UR	27959838	2.2e-06	0.190909	UR	424	1	27513741	28030599
7	NA	GLM	MAF5	SNP	Guaiacol_UR	4776442	2.24e-06	0.190682	UR	196	1	4776442	4776442
4	7	MLM	MAF5	SNP	Guaiacol_UR	987105	2.53e-06	0.191677	UR	44	3	929263	1050562
11	NA	GLM	G7	SNP	Guaiacol_UR	1897	2.66e-06	0.163471	UR	NA	1	1897	1897
11	NA	GLM	MAF5	SNP	Guaiacol_UR	1897	2.66e-06	0.163471	UR	NA	1	1897	1897
1	60	GLM	G7	SNP	Guaiacol_UR	28888924	2.8e-06	0.187691	UR	546	1	28738930	29184885
1	60	GLM	MAF5	SNP	Guaiacol_UR	28888924	2.8e-06	0.187691	UR	546	1	28738930	29184885
1	NA	MLM	MAF5	SNP	Guaiacol_UR	8382666	2.85e-06	0.189053	UR	257	1	8382666	8382666
7	2	GLM	G7	SNP	Guaiacol_UR	196804	3.08e-06	0.186468	UR	11	6	196804	747529
7	2	GLM	MAF5	SNP	Guaiacol_UR	258545	3.26e-06	0.185701	UR	15	6	196804	747529
3	59	GLM	G7	SNP	Guaiacol_UR	31707964	3.53e-06	0.184645	UR	594	1	31603638	31974346
3	59	GLM	MAF5	SNP	Guaiacol_UR	31707964	3.53e-06	0.184645	UR	594	2	31603638	31974346
5	42	GLM	G7	SNP	Guaiacol_UR	26545462	3.64e-06	0.184227	UR	387	10	24679572	27017453
5	42	GLM	MAF5	SNP	Guaiacol_UR	26545462	3.64e-06	0.184227	UR	387	9	24679572	27017453
5	53	GLM	G7	SNP	Guaiacol_UR	29969210	3.77e-06	0.183758	UR	489	1	29852280	29969218
5	53	GLM	MAF5	SNP	Guaiacol_UR	29969210	3.77e-06	0.183758	UR	489	1	29852280	29969218
1	71	GLM	G7	SNP	Guaiacol_UR	31194975	4.44e-06	0.181595	UR	627	1	31194973	32152403
1	71	GLM	MAF5	SNP	Guaiacol_UR	31194975	4.44e-06	0.181595	UR	627	1	31194973	32152403
5	NA	GLM	MAF5	SNP	Guaiacol_UR	27480099	4.54e-06	0.1813	UR	413	1	27480099	27480099
1	58	GLM	G7	SNP	Guaiacol_UR	27921603	5.33e-06	0.179153	UR	528	1	27913878	28105561
1	58	GLM	MAF5	SNP	Guaiacol_UR	27921603	5.33e-06	0.179153	UR	528	1	27913878	28105561
1	NA	GLM	MAF5	SNP	Guaiacol_UR	31192169	5.56e-06	0.178596	UR	625	1	31192169	31192169
5	NA	GLM	G7	SNP	Guaiacol_UR	24149108	5.64e-06	0.178404	UR	354	1	24149108	24149108
5	NA	GLM	MAF5	SNP	Guaiacol_UR	24149108	5.64e-06	0.178404	UR	354	1	24149108	24149108
5	85	GLM	MAF5	SNP	Guaiacol_UR	38107839	6.42e-06	0.176681	UR	785	1	38009862	38161832
7	NA	MLM	MAF5	SNP	Guaiacol_UR	4747857	6.8e-06	0.179206	UR	195	1	4747857	4747857
1	NA	GLM	G7	SNP	Guaiacol_UR	19598076	7.16e-06	0.150532	UR	NA	1	19598076	19598076
1	NA	GLM	MAF5	SNP	Guaiacol_UR	27887364	7.2e-06	0.175142	UR	526	1	27887364	27887364
7	1	GLM	G7	SNP	Guaiacol_UR	75779	7.2e-06	0.175138	UR	4	2	62776	162532
7	1	GLM	MAF5	SNP	Guaiacol_UR	75779	7.2e-06	0.175138	UR	4	1	62776	162532
5	82	GLM	MAF5	SNP	Guaiacol_UR	37690495	8.91e-06	0.172282	UR	758	1	37593471	37755711
5	49	GLM	G7	SNP	Guaiacol_UR	28892335	8.94e-06	0.172234	UR	454	1	28530169	29395287
5	49	GLM	MAF5	SNP	Guaiacol_UR	28892335	8.94e-06	0.172234	UR	454	1	28530169	29395287
2	NA	GLM	MAF5	SNP	Guaiacol_UR	11727594	9.72e-06	0.171113	UR	421	1	11727594	11727594
2	38	GLM	MAF5	SNP	Guaiacol_UR	8232103	9.99e-06	0.170731	UR	348	1	8216923	8236790
9	50	GLM	MAF5	SNP	Guaiacol_UR	35417973	1.01e-05	0.170551	UR	603	1	35371160	35567181
5	39	GLM	G7	SNP	Guaiacol_UR	20887048	1.03e-05	0.17038	UR	330	1	20887048	22479719
5	39	GLM	MAF5	SNP	Guaiacol_UR	20887048	1.03e-05	0.17038	UR	330	1	20887048	22479719
7	4	GLM	G7	SNP	Guaiacol_UR	1013836	1.04e-05	0.170247	UR	55	1	1003116	1269623
7	4	GLM	MAF5	SNP	Guaiacol_UR	1013836	1.04e-05	0.170247	UR	55	1	1003116	1269623
4	7	GLM	G7	SNP	Guaiacol_UR	947825	1.05e-05	0.170005	UR	39	1	929263	1050562
5	NA	GLM	G7	SNP	Guaiacol_UR	24280707	1.07e-05	0.169836	UR	357	1	24280707	24280707
5	NA	GLM	MAF5	SNP	Guaiacol_UR	24280707	1.07e-05	0.169836	UR	357	1	24280707	24280707
1	57	GLM	G7	SNP	Guaiacol_UR	27862365	1.15e-05	0.168882	UR	524	2	27862365	27863301
1	57	GLM	MAF5	SNP	Guaiacol_UR	27862365	1.15e-05	0.168882	UR	524	1	27862365	27863301
3	72	GLM	MAF5	SNP	Guaiacol_UR	35843732	1.22e-05	0.168079	UR	754	1	35842629	35847669
5	33	GLM	G7	SNP	Guaiacol_UR	8626277	1.24e-05	0.167794	UR	262	1	7385446	9269878
5	33	GLM	MAF5	SNP	Guaiacol_UR	8626277	1.24e-05	0.167794	UR	262	1	7385446	9269878
2	37	GLM	MAF5	SNP	Guaiacol_UR	7899616	1.25e-05	0.167718	UR	334	1	7812200	8143718
1	50	GLM	G7	SNP	Guaiacol_UR	24182221	1.27e-05	0.143019	UR	476	5	22126594	24182221
1	50	GLM	MAF5	SNP	Guaiacol_UR	24182221	1.27e-05	0.143019	UR	476	5	22126594	24182221
9	24	GLM	MAF5	SNP	Guaiacol_UR	6954494	1.41e-05	0.166094	UR	280	1	6851452	7232130
5	48	GLM	G7	SNP	Guaiacol_UR	28334361	1.46e-05	0.1656	UR	435	1	28210423	28435165
5	48	GLM	MAF5	SNP	Guaiacol_UR	28334361	1.46e-05	0.1656	UR	435	1	28210423	28435165
2	68	GLM	G7	SNP	Guaiacol_UR	35880672	1.48e-05	0.165391	UR	653	1	35744427	36601792
2	68	GLM	MAF5	SNP	Guaiacol_UR	35880672	1.48e-05	0.165391	UR	653	1	35744427	36601792
1	48	GLM	G7	SNP	Guaiacol_UR	19100918	1.49e-05	0.140861	UR	447	3	18713092	19100918
1	48	GLM	MAF5	SNP	Guaiacol_UR	19100918	1.49e-05	0.140861	UR	447	3	18713092	19100918
1	49	GLM	MAF5	SNP	Guaiacol_UR	19707891	1.49e-05	0.140861	UR	452	3	19707891	21765472
1	49	GLM	G7	SNP	Guaiacol_UR	19737996	1.49e-05	0.140861	UR	456	3	19707891	21765472
1	51	GLM	G7	SNP	Guaiacol_UR	25629162	1.49e-05	0.140861	UR	484	2	25244656	25962643
1	51	GLM	MAF5	SNP	Guaiacol_UR	25629162	1.49e-05	0.140861	UR	484	2	25244656	25962643
1	NA	GLM	G7	SNP	Guaiacol_UR	25962662	1.49e-05	0.140861	UR	490	1	25962662	25962662
1	NA	GLM	MAF5	SNP	Guaiacol_UR	25962662	1.49e-05	0.140861	UR	490	1	25962662	25962662
1	53	GLM	G7	SNP	Guaiacol_UR	26384077	1.49e-05	0.140861	UR	499	1	26356034	26472985
1	53	GLM	MAF5	SNP	Guaiacol_UR	26384077	1.49e-05	0.140861	UR	499	1	26356034	26472985
1	55	GLM	G7	SNP	Guaiacol_UR	26761639	1.49e-05	0.140861	UR	510	1	26665574	26852249
1	55	GLM	MAF5	SNP	Guaiacol_UR	26761639	1.49e-05	0.140861	UR	510	1	26665574	26852249
1	NA	GLM	G7	SNP	Guaiacol_UR	27278684	1.49e-05	0.140861	UR	516	1	27278684	27278684
1	NA	GLM	MAF5	SNP	Guaiacol_UR	27278684	1.49e-05	0.140861	UR	516	1	27278684	27278684
1	NA	GLM	G7	SNP	Guaiacol_UR	27350836	1.49e-05	0.140861	UR	518	1	27350836	27350836
1	NA	GLM	MAF5	SNP	Guaiacol_UR	27350836	1.49e-05	0.140861	UR	518	1	27350836	27350836
8	NA	GLM	G7	SNP	Guaiacol_UR	8236171	1.49e-05	0.140861	UR	353	1	8236171	8236171
8	NA	GLM	MAF5	SNP	Guaiacol_UR	8236171	1.49e-05	0.140861	UR	353	1	8236171	8236171
3	73	GLM	MAF5	SNP	Guaiacol_UR	35878999	1.55e-05	0.164792	UR	759	1	35855119	35878999
5	NA	GLM	G7	SNP	Guaiacol_UR	27342389	1.63e-05	0.164122	UR	411	1	27342389	27342389
5	40	GLM	G7	SNP	Guaiacol_UR	23385377	1.67e-05	0.163759	UR	348	1	23155929	23385377
2	76	GLM	G7	SNP	Guaiacol_UR	39563532	1.82e-05	0.162587	UR	745	1	39561863	39571370
5	54	GLM	G7	SNP	Guaiacol_UR	30028804	1.92e-05	0.161886	UR	493	1	30027105	30116349
5	33	GLM	NA	SSR	Guaiacol_UR	8269186	5.18e-05	0.156049	UR	SSR	1	7385446	9269878
9	NA	GLM	NA	SSR	Guaiacol_UR	6355360	0.000161	0.129081	UR	SSR	1	6355360	6355360
7	31	GLM	MAF5	SNP	Hexyl acetate_UR	10459413	1.01e-138	0.994296	UR	304	14	10032134	11286123
7	31	MLM	MAF5	SNP	Hexyl acetate_UR	10459413	3.08e-130	0.964344	UR	304	11	10032134	11286123
5	64	MLM	MAF5	SNP	Hexyl acetate_UR	33303465	3.2e-30	0.671092	UR	592	5	32660102	33718239
7	28	GLM	MAF5	SNP	Hexyl acetate_UR	7468506	2.32e-29	0.657708	UR	259	2	6535097	7472668
7	NA	GLM	MAF5	SNP	Hexyl acetate_UR	7802055	2.33e-29	0.657692	UR	265	1	7802055	7802055
7	28	MLM	MAF5	SNP	Hexyl acetate_UR	7468506	1.44e-21	0.546373	UR	259	2	6535097	7472668
7	NA	MLM	MAF5	SNP	Hexyl acetate_UR	7802055	1.69e-21	0.545196	UR	265	1	7802055	7802055
3	29	MLM	MAF5	SNP	Hexyl acetate_UR	21328040	3.81e-20	0.521533	UR	242	4	20869946	22404839
3	29	MLM	G7	SNP	Hexyl acetate_UR	21328040	6.2e-20	0.522013	UR	242	4	20869946	22404839
7	NA	GLM	MAF5	SNP	Hexyl acetate_UR	7829506	6.55e-19	0.49379	UR	267	1	7829506	7829506
5	64	GLM	MAF5	SNP	Hexyl acetate_UR	33470563	7.43e-19	0.492757	UR	597	16	32660102	33718239
5	66	GLM	MAF5	SNP	Hexyl acetate_UR	33815259	7.43e-19	0.492756	UR	614	2	33815259	33818915
5	NA	GLM	MAF5	SNP	Hexyl acetate_UR	30168620	8.91e-19	0.491255	UR	497	1	30168620	30168620
5	60	GLM	MAF5	SNP	Hexyl acetate_UR	31854741	8.98e-19	0.491185	UR	551	11	30954482	32047092
5	NA	GLM	MAF5	SNP	Hexyl acetate_UR	32141427	9.02e-19	0.491153	UR	562	1	32141427	32141427
5	NA	MLM	MAF5	SNP	Hexyl acetate_UR	32141427	1.16e-17	0.474718	UR	562	1	32141427	32141427
5	74	GLM	MAF5	SNP	Hexyl acetate_UR	35320699	1.23e-17	0.469042	UR	664	10	34946322	35585030
5	73	GLM	MAF5	SNP	Hexyl acetate_UR	34720947	1.36e-17	0.468188	UR	649	8	34500387	34843029
5	60	MLM	MAF5	SNP	Hexyl acetate_UR	31396883	1.48e-17	0.472629	UR	542	6	30954482	32047092
5	NA	MLM	MAF5	SNP	Hexyl acetate_UR	30168620	2.35e-17	0.468612	UR	497	1	30168620	30168620
2	8	GLM	MAF5	SNP	Hexyl acetate_UR	688966	3.14e-17	0.460916	UR	42	1	672566	689767
7	34	MLM	G7	SNP	Hexyl acetate_UR	13737290	4.1e-17	0.467601	UR	336	3	13592490	14112968
7	NA	MLM	G7	SNP	Hexyl acetate_UR	20158539	2.21e-16	0.452481	UR	360	1	20158539	20158539
7	34	MLM	MAF5	SNP	Hexyl acetate_UR	13737290	3.75e-16	0.44395	UR	336	3	13592490	14112968
5	66	MLM	MAF5	SNP	Hexyl acetate_UR	33815259	4.69e-16	0.441916	UR	614	1	33815259	33818915
7	NA	MLM	MAF5	SNP	Hexyl acetate_UR	20158539	1.44e-15	0.43155	UR	360	1	20158539	20158539
2	25	MLM	MAF5	SNP	Hexyl acetate_UR	3309086	1.41e-14	0.409861	UR	166	9	3259782	3596798
3	29	GLM	G7	SNP	Hexyl acetate_UR	21328040	4.99e-14	0.392267	UR	242	4	20869946	22404839
3	29	GLM	MAF5	SNP	Hexyl acetate_UR	21328040	4.99e-14	0.392267	UR	242	4	20869946	22404839
7	NA	GLM	MAF5	SNP	Hexyl acetate_UR	14865124	5.11e-14	0.39204	UR	346	1	14865124	14865124
5	64	GLM	G7	SNP	Hexyl acetate_UR	33690354	5.52e-14	0.391271	UR	606	12	32660102	33718239
5	65	GLM	G7	SNP	Hexyl acetate_UR	33768838	5.52e-14	0.391265	UR	613	1	33755079	33768838
5	65	GLM	MAF5	SNP	Hexyl acetate_UR	33768838	5.52e-14	0.391265	UR	613	1	33755079	33768838
5	68	GLM	MAF5	SNP	Hexyl acetate_UR	33876014	5.53e-14	0.391264	UR	620	2	33876014	34194247
5	62	GLM	G7	SNP	Hexyl acetate_UR	32457295	5.54e-14	0.391244	UR	578	6	32286904	32457295
5	62	GLM	MAF5	SNP	Hexyl acetate_UR	32457295	5.54e-14	0.391244	UR	578	8	32286904	32457295
5	75	GLM	MAF5	SNP	Hexyl acetate_UR	35676834	6.81e-14	0.389194	UR	679	8	35600426	35853778
5	53	GLM	G7	SNP	Hexyl acetate_UR	29917500	6.95e-14	0.388996	UR	483	4	29852280	29969218
5	53	GLM	MAF5	SNP	Hexyl acetate_UR	29917500	6.95e-14	0.388996	UR	483	4	29852280	29969218
5	60	GLM	G7	SNP	Hexyl acetate_UR	31099030	6.95e-14	0.388994	UR	537	7	30954482	32047092
7	33	MLM	G7	SNP	Hexyl acetate_UR	13391180	9.51e-14	0.394321	UR	326	1	13104815	13395238
5	NA	GLM	MAF5	SNP	Hexyl acetate_UR	32108014	1.07e-13	0.384648	UR	560	1	32108014	32108014
7	NA	MLM	MAF5	SNP	Hexyl acetate_UR	7829506	2.28e-13	0.38227	UR	267	1	7829506	7829506
3	31	MLM	MAF5	SNP	Hexyl acetate_UR	24456793	6.72e-13	0.371174	UR	273	5	24324879	24734237
7	33	MLM	MAF5	SNP	Hexyl acetate_UR	13391180	6.72e-13	0.371171	UR	326	1	13104815	13395238
3	30	MLM	G7	SNP	Hexyl acetate_UR	22742713	8.65e-13	0.371616	UR	259	3	22556875	23659956
3	30	MLM	MAF5	SNP	Hexyl acetate_UR	22742713	1.52e-12	0.362667	UR	259	3	22556875	23659956
2	21	MLM	MAF5	SNP	Hexyl acetate_UR	2614303	2.59e-12	0.357058	UR	135	1	2614303	2653966
2	22	MLM	MAF5	SNP	Hexyl acetate_UR	2811149	2.91e-12	0.355837	UR	145	2	2770663	2811149
5	62	MLM	MAF5	SNP	Hexyl acetate_UR	32457295	5.37e-12	0.349295	UR	578	4	32286904	32457295
2	25	MLM	G7	SNP	Hexyl acetate_UR	3309086	5.46e-12	0.35201	UR	166	9	3259782	3596798
3	31	MLM	G7	SNP	Hexyl acetate_UR	24397688	1.1e-11	0.344431	UR	271	3	24324879	24734237
5	62	MLM	G7	SNP	Hexyl acetate_UR	32457295	1.19e-11	0.343506	UR	578	2	32286904	32457295
5	60	MLM	G7	SNP	Hexyl acetate_UR	31033410	1.3e-11	0.342593	UR	536	2	30954482	32047092
5	53	MLM	MAF5	SNP	Hexyl acetate_UR	29917500	1.98e-11	0.335158	UR	483	1	29852280	29969218
2	25	GLM	G7	SNP	Hexyl acetate_UR	3309086	2.07e-11	0.329668	UR	166	6	3259782	3596798
2	25	GLM	MAF5	SNP	Hexyl acetate_UR	3309086	2.07e-11	0.329668	UR	166	6	3259782	3596798
2	NA	GLM	G7	SNP	Hexyl acetate_UR	3155793	2.21e-11	0.328956	UR	157	1	3155793	3155793
2	NA	GLM	MAF5	SNP	Hexyl acetate_UR	3155793	2.21e-11	0.328956	UR	157	1	3155793	3155793
5	53	MLM	G7	SNP	Hexyl acetate_UR	29917500	2.38e-11	0.335884	UR	483	1	29852280	29969218
5	56	GLM	G7	SNP	Hexyl acetate_UR	30471918	2.39e-11	0.328118	UR	516	1	30407214	30473075
5	56	GLM	MAF5	SNP	Hexyl acetate_UR	30471918	2.39e-11	0.328118	UR	516	1	30407214	30473075
3	31	GLM	MAF5	SNP	Hexyl acetate_UR	24456793	2.64e-11	0.327049	UR	273	5	24324879	24734237
6	68	MLM	G7	SNP	Hexyl acetate_UR	25876465	2.76e-11	0.33424	UR	534	9	25801401	26051844
2	22	MLM	G7	SNP	Hexyl acetate_UR	2811149	3.22e-11	0.332522	UR	145	2	2770663	2811149
7	35	GLM	MAF5	SNP	Hexyl acetate_UR	17922140	3.37e-11	0.324371	UR	355	4	17406634	17922175
7	NA	GLM	G7	SNP	Hexyl acetate_UR	19532894	3.4e-11	0.324251	UR	358	1	19532894	19532894
7	NA	GLM	MAF5	SNP	Hexyl acetate_UR	19532894	3.4e-11	0.324251	UR	358	1	19532894	19532894
5	75	GLM	G7	SNP	Hexyl acetate_UR	35600426	3.83e-11	0.322961	UR	672	8	35600426	35853778
5	74	GLM	G7	SNP	Hexyl acetate_UR	35184834	4.07e-11	0.32228	UR	662	8	34946322	35585030
5	42	GLM	G7	SNP	Hexyl acetate_UR	27017453	4.23e-11	0.321851	UR	397	15	24679572	27017453
5	42	GLM	MAF5	SNP	Hexyl acetate_UR	27017453	4.23e-11	0.321851	UR	397	15	24679572	27017453
5	NA	GLM	MAF5	SNP	Hexyl acetate_UR	27089119	4.24e-11	0.321834	UR	402	1	27089119	27089119
2	21	MLM	G7	SNP	Hexyl acetate_UR	2614303	4.83e-11	0.328005	UR	135	1	2614303	2653966
7	32	GLM	G7	SNP	Hexyl acetate_UR	11339733	5.23e-11	0.319511	UR	313	5	11339733	11706922
7	32	GLM	MAF5	SNP	Hexyl acetate_UR	11339733	5.23e-11	0.319511	UR	313	5	11339733	11706922
5	NA	GLM	G7	SNP	Hexyl acetate_UR	32530806	5.42e-11	0.319124	UR	582	1	32530806	32530806
5	NA	GLM	MAF5	SNP	Hexyl acetate_UR	32530806	5.42e-11	0.319124	UR	582	1	32530806	32530806
7	31	GLM	G7	SNP	Hexyl acetate_UR	10187099	5.43e-11	0.319087	UR	301	11	10032134	11286123
5	45	GLM	MAF5	SNP	Hexyl acetate_UR	27778611	6.23e-11	0.317573	UR	423	3	27513741	28030599
5	68	MLM	MAF5	SNP	Hexyl acetate_UR	33876014	8.28e-11	0.31929	UR	620	1	33876014	34194247
5	61	GLM	MAF5	SNP	Hexyl acetate_UR	32231193	8.86e-11	0.313656	UR	566	3	32160889	32276718
6	64	MLM	G7	SNP	Hexyl acetate_UR	24659299	1.18e-10	0.317935	UR	495	13	23913803	25147021
2	30	MLM	MAF5	SNP	Hexyl acetate_UR	4755446	1.77e-10	0.31073	UR	227	3	4538805	4755446
5	64	MLM	G7	SNP	Hexyl acetate_UR	33690354	1.79e-10	0.313152	UR	606	2	32660102	33718239
6	68	MLM	MAF5	SNP	Hexyl acetate_UR	25876465	2.02e-10	0.309224	UR	534	9	25801401	26051844
5	65	MLM	G7	SNP	Hexyl acetate_UR	33768838	2.14e-10	0.311088	UR	613	1	33755079	33768838
5	56	MLM	G7	SNP	Hexyl acetate_UR	30471918	2.79e-10	0.30803	UR	516	1	30407214	30473075
6	64	MLM	MAF5	SNP	Hexyl acetate_UR	24658673	3.45e-10	0.303056	UR	494	11	23913803	25147021
2	19	MLM	MAF5	SNP	Hexyl acetate_UR	1870980	3.48e-10	0.302963	UR	104	9	1726246	2104806
2	30	MLM	G7	SNP	Hexyl acetate_UR	4755446	3.58e-10	0.305162	UR	227	3	4538805	4755446
5	56	MLM	MAF5	SNP	Hexyl acetate_UR	30471918	3.58e-10	0.302655	UR	516	1	30407214	30473075
5	65	MLM	MAF5	SNP	Hexyl acetate_UR	33768838	3.59e-10	0.302615	UR	613	1	33755079	33768838
3	35	MLM	MAF5	SNP	Hexyl acetate_UR	25728535	6.47e-10	0.295799	UR	319	2	25728535	25776940
2	NA	MLM	MAF5	SNP	Hexyl acetate_UR	3155793	7.43e-10	0.294184	UR	157	1	3155793	3155793
7	NA	MLM	MAF5	SNP	Hexyl acetate_UR	14865124	9.29e-10	0.29158	UR	346	1	14865124	14865124
3	35	GLM	G7	SNP	Hexyl acetate_UR	25728535	1.23e-09	0.283668	UR	319	2	25728535	25776940
3	35	GLM	MAF5	SNP	Hexyl acetate_UR	25728535	1.23e-09	0.283668	UR	319	2	25728535	25776940
2	23	MLM	MAF5	SNP	Hexyl acetate_UR	2868827	1.25e-09	0.288076	UR	147	2	2868827	2991494
2	21	GLM	G7	SNP	Hexyl acetate_UR	2614303	1.63e-09	0.280365	UR	135	1	2614303	2653966
2	21	GLM	MAF5	SNP	Hexyl acetate_UR	2614303	1.63e-09	0.280365	UR	135	1	2614303	2653966
2	27	MLM	MAF5	SNP	Hexyl acetate_UR	4021619	1.69e-09	0.284568	UR	199	1	4021619	4021640
2	NA	GLM	G7	SNP	Hexyl acetate_UR	3116081	1.72e-09	0.279748	UR	155	1	3116081	3116081
2	NA	GLM	MAF5	SNP	Hexyl acetate_UR	3116081	1.72e-09	0.279748	UR	155	1	3116081	3116081
3	31	GLM	G7	SNP	Hexyl acetate_UR	24397688	1.83e-09	0.279024	UR	271	3	24324879	24734237
3	35	MLM	G7	SNP	Hexyl acetate_UR	25728535	2.31e-09	0.283164	UR	319	2	25728535	25776940
5	NA	GLM	G7	SNP	Hexyl acetate_UR	36193143	2.43e-09	0.27569	UR	701	1	36193143	36193143
5	NA	GLM	MAF5	SNP	Hexyl acetate_UR	36193143	2.43e-09	0.27569	UR	701	1	36193143	36193143
5	76	GLM	G7	SNP	Hexyl acetate_UR	36142436	2.44e-09	0.275632	UR	699	4	35928139	36176605
5	76	GLM	MAF5	SNP	Hexyl acetate_UR	36142436	2.44e-09	0.275632	UR	699	4	35928139	36176605
5	77	GLM	G7	SNP	Hexyl acetate_UR	36345121	2.47e-09	0.275512	UR	707	4	36299101	36438628
5	77	GLM	MAF5	SNP	Hexyl acetate_UR	36345121	2.47e-09	0.275512	UR	707	4	36299101	36438628
7	NA	GLM	G7	SNP	Hexyl acetate_UR	9993692	2.51e-09	0.275283	UR	296	1	9993692	9993692
7	NA	GLM	MAF5	SNP	Hexyl acetate_UR	9993692	2.51e-09	0.275283	UR	296	1	9993692	9993692
7	29	GLM	G7	SNP	Hexyl acetate_UR	8922703	2.52e-09	0.275246	UR	281	10	8409460	9133926
7	29	GLM	MAF5	SNP	Hexyl acetate_UR	8922703	2.52e-09	0.275246	UR	281	10	8409460	9133926
5	54	GLM	G7	SNP	Hexyl acetate_UR	30028804	2.64e-09	0.274688	UR	493	4	30027105	30116349
5	54	GLM	MAF5	SNP	Hexyl acetate_UR	30028804	2.64e-09	0.274688	UR	493	4	30027105	30116349
5	NA	GLM	G7	SNP	Hexyl acetate_UR	32284769	2.64e-09	0.274714	UR	568	1	32284769	32284769
5	NA	GLM	MAF5	SNP	Hexyl acetate_UR	32284769	2.64e-09	0.274714	UR	568	1	32284769	32284769
7	36	MLM	G7	SNP	Hexyl acetate_UR	20608012	2.83e-09	0.280757	UR	363	1	20291937	20608012
2	27	MLM	G7	SNP	Hexyl acetate_UR	4021619	2.97e-09	0.28017	UR	199	1	4021619	4021640
5	45	MLM	MAF5	SNP	Hexyl acetate_UR	27778596	3.15e-09	0.277137	UR	422	2	27513741	28030599
7	NA	GLM	MAF5	SNP	Hexyl acetate_UR	4747857	3.29e-09	0.272119	UR	195	1	4747857	4747857
7	NA	GLM	MAF5	SNP	Hexyl acetate_UR	4776442	4.31e-09	0.268908	UR	196	1	4776442	4776442
5	NA	GLM	G7	SNP	Hexyl acetate_UR	24412264	4.36e-09	0.268771	UR	360	1	24412264	24412264
5	NA	GLM	MAF5	SNP	Hexyl acetate_UR	24412264	4.36e-09	0.268771	UR	360	1	24412264	24412264
6	65	MLM	G7	SNP	Hexyl acetate_UR	25282120	4.75e-09	0.274492	UR	510	9	25201654	25545192
6	68	GLM	G7	SNP	Hexyl acetate_UR	25801401	5.22e-09	0.266618	UR	530	4	25801401	26051844
6	68	GLM	MAF5	SNP	Hexyl acetate_UR	25801401	5.22e-09	0.266618	UR	530	5	25801401	26051844
5	NA	GLM	MAF5	SNP	Hexyl acetate_UR	27480099	5.35e-09	0.266325	UR	413	1	27480099	27480099
7	NA	GLM	G7	SNP	Hexyl acetate_UR	15181544	6.45e-09	0.264088	UR	347	1	15181544	15181544
7	NA	GLM	MAF5	SNP	Hexyl acetate_UR	15181544	6.45e-09	0.264088	UR	347	1	15181544	15181544
2	NA	GLM	MAF5	SNP	Hexyl acetate_UR	40567	6.96e-09	0.263188	UR	6	1	40567	40567
2	20	MLM	MAF5	SNP	Hexyl acetate_UR	2536376	7.68e-09	0.26643	UR	130	7	2108490	2550703
2	NA	MLM	MAF5	SNP	Hexyl acetate_UR	1567158	9.56e-09	0.263772	UR	84	1	1567158	1567158
5	NA	MLM	MAF5	SNP	Hexyl acetate_UR	27089119	1.04e-08	0.262778	UR	402	1	27089119	27089119
2	19	MLM	G7	SNP	Hexyl acetate_UR	1870980	1.23e-08	0.262827	UR	104	8	1726246	2104806
5	42	MLM	MAF5	SNP	Hexyl acetate_UR	25496497	1.33e-08	0.259749	UR	368	15	24679572	27017453
6	65	MLM	MAF5	SNP	Hexyl acetate_UR	25282120	1.46e-08	0.258625	UR	510	7	25201654	25545192
10	55	MLM	MAF5	SNP	Hexyl acetate_UR	21270811	1.46e-08	0.258643	UR	398	1	21270667	21270811
7	23	GLM	MAF5	SNP	Hexyl acetate_UR	5508489	1.62e-08	0.253014	UR	215	2	5508489	5509061
7	24	GLM	MAF5	SNP	Hexyl acetate_UR	5642990	1.62e-08	0.253014	UR	222	4	5596523	5648293
2	23	MLM	G7	SNP	Hexyl acetate_UR	2868827	1.71e-08	0.258807	UR	147	2	2868827	2991494
6	NA	MLM	G7	SNP	Hexyl acetate_UR	26244041	1.72e-08	0.258727	UR	544	1	26244041	26244041
7	36	MLM	MAF5	SNP	Hexyl acetate_UR	20608012	1.87e-08	0.255593	UR	363	1	20291937	20608012
7	NA	GLM	MAF5	SNP	Hexyl acetate_UR	5359388	2.27e-08	0.248884	UR	212	1	5359388	5359388
5	42	MLM	G7	SNP	Hexyl acetate_UR	27017453	2.38e-08	0.254696	UR	397	10	24679572	27017453
6	67	MLM	MAF5	SNP	Hexyl acetate_UR	25664581	2.38e-08	0.252588	UR	525	1	25640726	25664581
6	67	MLM	G7	SNP	Hexyl acetate_UR	25664581	2.4e-08	0.254568	UR	525	1	25640726	25664581
5	NA	MLM	MAF5	SNP	Hexyl acetate_UR	30486003	2.59e-08	0.251527	UR	518	1	30486003	30486003
9	NA	MLM	MAF5	SNP	Hexyl acetate_UR	908021	2.6e-08	0.251476	UR	37	1	908021	908021
7	31	MLM	G7	SNP	Hexyl acetate_UR	10187099	2.62e-08	0.253497	UR	301	9	10032134	11286123
6	NA	MLM	MAF5	SNP	Hexyl acetate_UR	26244041	2.66e-08	0.25121	UR	544	1	26244041	26244041
2	32	MLM	G7	SNP	Hexyl acetate_UR	4901678	2.7e-08	0.253097	UR	234	1	4901678	5954795
2	8	MLM	MAF5	SNP	Hexyl acetate_UR	688966	2.72e-08	0.250932	UR	42	1	672566	689767
5	74	MLM	MAF5	SNP	Hexyl acetate_UR	35360456	2.87e-08	0.250275	UR	666	5	34946322	35585030
5	73	MLM	MAF5	SNP	Hexyl acetate_UR	34720947	2.96e-08	0.249884	UR	649	1	34500387	34843029
2	NA	MLM	MAF5	SNP	Hexyl acetate_UR	3116081	3.23e-08	0.248797	UR	155	1	3116081	3116081
2	22	GLM	G7	SNP	Hexyl acetate_UR	2781993	3.52e-08	0.243496	UR	143	3	2770663	2811149
2	22	GLM	MAF5	SNP	Hexyl acetate_UR	2781993	3.52e-08	0.243496	UR	143	3	2770663	2811149
2	23	GLM	G7	SNP	Hexyl acetate_UR	2949807	3.53e-08	0.243483	UR	148	1	2868827	2991494
2	23	GLM	MAF5	SNP	Hexyl acetate_UR	2949807	3.53e-08	0.243483	UR	148	1	2868827	2991494
6	66	MLM	G7	SNP	Hexyl acetate_UR	25571053	3.8e-08	0.248845	UR	518	1	25556667	25571053
5	66	GLM	G7	SNP	Hexyl acetate_UR	33818915	3.83e-08	0.24248	UR	615	1	33815259	33818915
2	20	MLM	G7	SNP	Hexyl acetate_UR	2536376	3.93e-08	0.248404	UR	130	7	2108490	2550703
5	61	GLM	G7	SNP	Hexyl acetate_UR	32182926	4.44e-08	0.240635	UR	564	2	32160889	32276718
5	NA	MLM	G7	SNP	Hexyl acetate_UR	30486003	4.46e-08	0.246833	UR	518	1	30486003	30486003
5	NA	GLM	G7	SNP	Hexyl acetate_UR	34310820	4.53e-08	0.240386	UR	633	1	34310820	34310820
5	NA	GLM	MAF5	SNP	Hexyl acetate_UR	34310820	4.53e-08	0.240386	UR	633	1	34310820	34310820
5	78	GLM	G7	SNP	Hexyl acetate_UR	36536724	4.66e-08	0.240051	UR	714	1	36536724	36689750
5	78	GLM	MAF5	SNP	Hexyl acetate_UR	36536724	4.66e-08	0.240051	UR	714	1	36536724	36689750
5	73	GLM	G7	SNP	Hexyl acetate_UR	34678373	4.69e-08	0.239972	UR	645	5	34500387	34843029
5	NA	MLM	MAF5	SNP	Hexyl acetate_UR	27480099	4.76e-08	0.243977	UR	413	1	27480099	27480099
6	NA	GLM	G7	SNP	Hexyl acetate_UR	20672979	4.89e-08	0.239462	UR	334	1	20672979	20672979
6	NA	GLM	MAF5	SNP	Hexyl acetate_UR	20672979	4.89e-08	0.239462	UR	334	1	20672979	20672979
5	81	GLM	G7	SNP	Hexyl acetate_UR	37220892	5.28e-08	0.238499	UR	745	13	37076966	37549697
5	81	GLM	MAF5	SNP	Hexyl acetate_UR	37549697	5.29e-08	0.23849	UR	755	13	37076966	37549697
2	32	MLM	MAF5	SNP	Hexyl acetate_UR	4901678	5.43e-08	0.242334	UR	234	1	4901678	5954795
7	NA	GLM	G7	SNP	Hexyl acetate_UR	14819132	5.64e-08	0.237689	UR	345	1	14819132	14819132
7	NA	GLM	MAF5	SNP	Hexyl acetate_UR	14819132	5.64e-08	0.237689	UR	345	1	14819132	14819132
6	NA	GLM	G7	SNP	Hexyl acetate_UR	5644378	5.67e-08	0.237613	UR	118	1	5644378	5644378
6	NA	GLM	MAF5	SNP	Hexyl acetate_UR	5644378	5.67e-08	0.237613	UR	118	1	5644378	5644378
5	NA	GLM	G7	SNP	Hexyl acetate_UR	30486003	6.18e-08	0.236559	UR	518	1	30486003	30486003
5	NA	GLM	MAF5	SNP	Hexyl acetate_UR	30486003	6.18e-08	0.236559	UR	518	1	30486003	30486003
2	NA	MLM	G7	SNP	Hexyl acetate_UR	4762045	6.31e-08	0.242447	UR	229	1	4762045	4762045
2	NA	MLM	MAF5	SNP	Hexyl acetate_UR	1650409	6.4e-08	0.240261	UR	91	1	1650409	1650409
5	NA	GLM	G7	SNP	Hexyl acetate_UR	37065609	6.63e-08	0.235672	UR	735	1	37065609	37065609
5	NA	GLM	MAF5	SNP	Hexyl acetate_UR	37065609	6.63e-08	0.235672	UR	735	1	37065609	37065609
2	18	MLM	MAF5	SNP	Hexyl acetate_UR	1676118	6.74e-08	0.239616	UR	92	2	1676118	1676211
6	66	MLM	MAF5	SNP	Hexyl acetate_UR	25571053	7.48e-08	0.238303	UR	518	1	25556667	25571053
7	32	MLM	MAF5	SNP	Hexyl acetate_UR	11339733	8.11e-08	0.237283	UR	313	1	11339733	11706922
6	NA	MLM	G7	SNP	Hexyl acetate_UR	26197294	8.51e-08	0.238637	UR	543	1	26197294	26197294
7	NA	GLM	G7	SNP	Hexyl acetate_UR	12090167	8.53e-08	0.232538	UR	322	1	12090167	12090167
7	NA	GLM	MAF5	SNP	Hexyl acetate_UR	12090167	8.53e-08	0.232538	UR	322	1	12090167	12090167
2	NA	MLM	MAF5	SNP	Hexyl acetate_UR	1633184	9.23e-08	0.23565	UR	90	1	1633184	1633184
6	NA	MLM	MAF5	SNP	Hexyl acetate_UR	26197294	9.24e-08	0.235638	UR	543	1	26197294	26197294
11	NA	GLM	MAF5	SNP	Hexyl acetate_UR	50282	1.03e-07	0.230136	UR	NA	1	50282	50282
5	NA	MLM	G7	SNP	Hexyl acetate_UR	30276019	1.05e-07	0.235918	UR	505	1	30276019	30276019
5	75	MLM	G7	SNP	Hexyl acetate_UR	35676834	1.06e-07	0.235898	UR	679	9	35600426	35853778
2	NA	MLM	G7	SNP	Hexyl acetate_UR	3155793	1.18e-07	0.234466	UR	157	1	3155793	3155793
5	45	GLM	G7	SNP	Hexyl acetate_UR	27636489	1.24e-07	0.227904	UR	418	1	27513741	28030599
7	32	MLM	G7	SNP	Hexyl acetate_UR	11339733	1.25e-07	0.233714	UR	313	1	11339733	11706922
6	17	MLM	G7	SNP	Hexyl acetate_UR	5118883	1.47e-07	0.231674	UR	114	1	4280030	5627934
5	75	MLM	MAF5	SNP	Hexyl acetate_UR	35676834	1.55e-07	0.229035	UR	679	9	35600426	35853778
9	NA	GLM	MAF5	SNP	Hexyl acetate_UR	908021	1.73e-07	0.223694	UR	37	1	908021	908021
7	34	GLM	G7	SNP	Hexyl acetate_UR	13792006	1.76e-07	0.223456	UR	338	3	13592490	14112968
7	34	GLM	MAF5	SNP	Hexyl acetate_UR	13792006	1.76e-07	0.223456	UR	338	3	13592490	14112968
7	NA	GLM	G7	SNP	Hexyl acetate_UR	20158539	1.76e-07	0.22345	UR	360	1	20158539	20158539
7	NA	GLM	MAF5	SNP	Hexyl acetate_UR	20158539	1.76e-07	0.22345	UR	360	1	20158539	20158539
5	NA	MLM	G7	SNP	Hexyl acetate_UR	30365664	2.22e-07	0.226346	UR	509	1	30365664	30365664
5	NA	MLM	MAF5	SNP	Hexyl acetate_UR	30276019	2.53e-07	0.222817	UR	505	1	30276019	30276019
2	NA	MLM	MAF5	SNP	Hexyl acetate_UR	4762045	2.99e-07	0.220645	UR	229	1	4762045	4762045
3	34	GLM	G7	SNP	Hexyl acetate_UR	25484355	3.02e-07	0.216598	UR	313	4	25403491	25676809
3	34	GLM	MAF5	SNP	Hexyl acetate_UR	25484355	3.02e-07	0.216598	UR	313	4	25403491	25676809
3	32	GLM	G7	SNP	Hexyl acetate_UR	25022376	3.04e-07	0.216527	UR	297	2	24975420	25339701
3	32	GLM	MAF5	SNP	Hexyl acetate_UR	25022376	3.04e-07	0.216527	UR	297	2	24975420	25339701
2	27	GLM	G7	SNP	Hexyl acetate_UR	4021619	3.05e-07	0.216486	UR	199	1	4021619	4021640
2	27	GLM	MAF5	SNP	Hexyl acetate_UR	4021619	3.05e-07	0.216486	UR	199	1	4021619	4021640
5	54	MLM	MAF5	SNP	Hexyl acetate_UR	30045637	3.05e-07	0.2204	UR	494	3	30027105	30116349
5	NA	GLM	G7	SNP	Hexyl acetate_UR	34284801	3.27e-07	0.215577	UR	628	1	34284801	34284801
5	NA	GLM	MAF5	SNP	Hexyl acetate_UR	34284801	3.27e-07	0.215577	UR	628	1	34284801	34284801
1	NA	GLM	G7	SNP	Hexyl acetate_UR	8951141	3.31e-07	0.215442	UR	267	1	8951141	8951141
1	NA	GLM	MAF5	SNP	Hexyl acetate_UR	8951141	3.31e-07	0.215442	UR	267	1	8951141	8951141
5	NA	MLM	MAF5	SNP	Hexyl acetate_UR	30526047	3.34e-07	0.219208	UR	521	1	30526047	30526047
9	NA	MLM	MAF5	SNP	Hexyl acetate_UR	228168	3.38e-07	0.21908	UR	10	1	228168	228168
2	19	GLM	G7	SNP	Hexyl acetate_UR	1870980	3.54e-07	0.214571	UR	104	3	1726246	2104806
2	19	GLM	MAF5	SNP	Hexyl acetate_UR	1870980	3.54e-07	0.214571	UR	104	3	1726246	2104806
2	30	GLM	G7	SNP	Hexyl acetate_UR	4755446	3.57e-07	0.214451	UR	227	1	4538805	4755446
2	30	GLM	MAF5	SNP	Hexyl acetate_UR	4755446	3.57e-07	0.214451	UR	227	1	4538805	4755446
7	NA	GLM	G7	SNP	Hexyl acetate_UR	5837217	3.64e-07	0.214227	UR	231	1	5837217	5837217
7	NA	GLM	MAF5	SNP	Hexyl acetate_UR	5837217	3.64e-07	0.214227	UR	231	1	5837217	5837217
2	NA	GLM	G7	SNP	Hexyl acetate_UR	1567158	3.65e-07	0.214175	UR	84	1	1567158	1567158
2	NA	GLM	MAF5	SNP	Hexyl acetate_UR	1567158	3.65e-07	0.214175	UR	84	1	1567158	1567158
2	20	GLM	G7	SNP	Hexyl acetate_UR	2401172	3.65e-07	0.214181	UR	126	3	2108490	2550703
2	20	GLM	MAF5	SNP	Hexyl acetate_UR	2550703	3.65e-07	0.214173	UR	131	3	2108490	2550703
5	74	MLM	G7	SNP	Hexyl acetate_UR	35184834	3.7e-07	0.219701	UR	662	3	34946322	35585030
3	NA	GLM	G7	SNP	Hexyl acetate_UR	24877497	3.71e-07	0.21397	UR	292	1	24877497	24877497
3	NA	GLM	MAF5	SNP	Hexyl acetate_UR	24877497	3.71e-07	0.21397	UR	292	1	24877497	24877497
5	NA	GLM	G7	SNP	Hexyl acetate_UR	30276019	3.81e-07	0.213642	UR	505	1	30276019	30276019
5	NA	GLM	MAF5	SNP	Hexyl acetate_UR	30276019	3.81e-07	0.213642	UR	505	1	30276019	30276019
5	NA	GLM	G7	SNP	Hexyl acetate_UR	30365664	3.81e-07	0.213649	UR	509	1	30365664	30365664
5	NA	GLM	MAF5	SNP	Hexyl acetate_UR	30365664	3.81e-07	0.213649	UR	509	1	30365664	30365664
2	13	GLM	G7	SNP	Hexyl acetate_UR	1116324	3.82e-07	0.213609	UR	71	2	1065901	1181828
2	13	GLM	MAF5	SNP	Hexyl acetate_UR	1116324	3.82e-07	0.213609	UR	71	2	1065901	1181828
2	15	GLM	G7	SNP	Hexyl acetate_UR	1276161	3.82e-07	0.213609	UR	80	1	1276161	1280783
2	15	GLM	MAF5	SNP	Hexyl acetate_UR	1276161	3.82e-07	0.213609	UR	80	1	1276161	1280783
5	NA	GLM	G7	SNP	Hexyl acetate_UR	30526047	3.89e-07	0.21338	UR	521	1	30526047	30526047
5	NA	GLM	MAF5	SNP	Hexyl acetate_UR	30526047	3.89e-07	0.21338	UR	521	1	30526047	30526047
7	NA	GLM	G7	SNP	Hexyl acetate_UR	8085351	3.93e-07	0.213231	UR	270	1	8085351	8085351
7	NA	GLM	MAF5	SNP	Hexyl acetate_UR	8085351	3.93e-07	0.213231	UR	270	1	8085351	8085351
7	30	GLM	MAF5	SNP	Hexyl acetate_UR	9501776	4.01e-07	0.212978	UR	288	9	9499758	9942258
7	30	GLM	G7	SNP	Hexyl acetate_UR	9754864	4.01e-07	0.212989	UR	292	9	9499758	9942258
5	71	GLM	G7	SNP	Hexyl acetate_UR	34306027	4.03e-07	0.212922	UR	631	2	34300336	34306027
5	71	GLM	MAF5	SNP	Hexyl acetate_UR	34306027	4.03e-07	0.212922	UR	631	2	34300336	34306027
5	72	GLM	G7	SNP	Hexyl acetate_UR	34327211	4.05e-07	0.212863	UR	635	1	34327211	34436793
5	72	GLM	MAF5	SNP	Hexyl acetate_UR	34327211	4.05e-07	0.212863	UR	635	1	34327211	34436793
5	NA	GLM	G7	SNP	Hexyl acetate_UR	33842461	4.19e-07	0.212403	UR	616	1	33842461	33842461
5	NA	GLM	MAF5	SNP	Hexyl acetate_UR	33842461	4.19e-07	0.212403	UR	616	1	33842461	33842461
1	26	MLM	G7	SNP	Hexyl acetate_UR	7823409	4.23e-07	0.217945	UR	245	2	6834165	7942921
5	NA	GLM	G7	SNP	Hexyl acetate_UR	30715546	4.23e-07	0.212302	UR	531	1	30715546	30715546
5	NA	GLM	MAF5	SNP	Hexyl acetate_UR	30715546	4.23e-07	0.212302	UR	531	1	30715546	30715546
2	NA	MLM	G7	SNP	Hexyl acetate_UR	3116081	4.33e-07	0.217644	UR	155	1	3116081	3116081
5	86	GLM	G7	SNP	Hexyl acetate_UR	38223812	4.39e-07	0.211828	UR	791	2	38171126	38284807
5	86	GLM	MAF5	SNP	Hexyl acetate_UR	38223812	4.39e-07	0.211828	UR	791	2	38171126	38284807
3	30	GLM	G7	SNP	Hexyl acetate_UR	22742713	4.4e-07	0.211785	UR	259	3	22556875	23659956
3	30	GLM	MAF5	SNP	Hexyl acetate_UR	22742713	4.4e-07	0.211785	UR	259	3	22556875	23659956
5	61	MLM	MAF5	SNP	Hexyl acetate_UR	32231193	4.47e-07	0.215431	UR	566	1	32160889	32276718
7	35	GLM	G7	SNP	Hexyl acetate_UR	17844939	4.71e-07	0.210905	UR	354	1	17406634	17922175
9	20	MLM	G7	SNP	Hexyl acetate_UR	5545890	4.89e-07	0.216041	UR	219	4	5327028	6165415
7	NA	GLM	G7	SNP	Hexyl acetate_UR	11835885	5.12e-07	0.209839	UR	320	1	11835885	11835885
7	NA	GLM	MAF5	SNP	Hexyl acetate_UR	11835885	5.12e-07	0.209839	UR	320	1	11835885	11835885
5	NA	MLM	G7	SNP	Hexyl acetate_UR	30526047	5.15e-07	0.21537	UR	521	1	30526047	30526047
5	NA	MLM	MAF5	SNP	Hexyl acetate_UR	30365664	5.23e-07	0.213389	UR	509	1	30365664	30365664
6	46	MLM	MAF5	SNP	Hexyl acetate_UR	21164252	5.46e-07	0.212835	UR	355	4	21164252	21391062
5	54	MLM	G7	SNP	Hexyl acetate_UR	30045637	5.82e-07	0.213765	UR	494	3	30027105	30116349
2	13	MLM	MAF5	SNP	Hexyl acetate_UR	1116324	5.9e-07	0.211829	UR	71	4	1065901	1181828
2	15	MLM	MAF5	SNP	Hexyl acetate_UR	1276161	5.9e-07	0.211829	UR	80	1	1276161	1280783
5	NA	GLM	G7	SNP	Hexyl acetate_UR	30155225	5.92e-07	0.20798	UR	496	1	30155225	30155225
5	NA	GLM	MAF5	SNP	Hexyl acetate_UR	30155225	5.92e-07	0.20798	UR	496	1	30155225	30155225
5	78	MLM	G7	SNP	Hexyl acetate_UR	36536724	6.27e-07	0.212784	UR	714	1	36536724	36689750
7	NA	GLM	MAF5	SNP	Hexyl acetate_UR	16269416	6.29e-07	0.207188	UR	349	1	16269416	16269416
2	NA	MLM	MAF5	SNP	Hexyl acetate_UR	4003755	6.63e-07	0.210301	UR	197	1	4003755	4003755
2	NA	MLM	G7	SNP	Hexyl acetate_UR	1567158	6.71e-07	0.211882	UR	84	1	1567158	1567158
2	31	MLM	MAF5	SNP	Hexyl acetate_UR	4821878	6.8e-07	0.209973	UR	231	2	4808252	4821878
2	NA	MLM	MAF5	SNP	Hexyl acetate_UR	501121	7.39e-07	0.208876	UR	34	1	501121	501121
2	18	MLM	G7	SNP	Hexyl acetate_UR	1676211	7.66e-07	0.210145	UR	93	2	1676118	1676211
3	34	MLM	MAF5	SNP	Hexyl acetate_UR	25484355	7.76e-07	0.208245	UR	313	1	25403491	25676809
6	46	MLM	G7	SNP	Hexyl acetate_UR	21164252	7.86e-07	0.209801	UR	355	4	21164252	21391062
2	NA	MLM	MAF5	SNP	Hexyl acetate_UR	1570411	8.17e-07	0.207567	UR	86	1	1570411	1570411
6	65	GLM	G7	SNP	Hexyl acetate_UR	25545192	8.59e-07	0.203164	UR	516	4	25201654	25545192
6	65	GLM	MAF5	SNP	Hexyl acetate_UR	25545192	8.59e-07	0.203164	UR	516	4	25201654	25545192
5	81	GLM	NA	SSR	Hexyl acetate_UR	37158877	8.69e-07	0.178451	UR	SSR	1	37076966	37549697
3	32	MLM	MAF5	SNP	Hexyl acetate_UR	25022376	9.09e-07	0.206162	UR	297	1	24975420	25339701
5	41	MLM	MAF5	SNP	Hexyl acetate_UR	23868489	9.93e-07	0.205006	UR	351	1	23520882	24149077
7	NA	MLM	G7	SNP	Hexyl acetate_UR	19532894	1.07e-06	0.205688	UR	358	1	19532894	19532894
2	NA	MLM	G7	SNP	Hexyl acetate_UR	1633184	1.12e-06	0.20511	UR	90	1	1633184	1633184
2	NA	MLM	G7	SNP	Hexyl acetate_UR	4003755	1.12e-06	0.205053	UR	197	1	4003755	4003755
7	33	GLM	G7	SNP	Hexyl acetate_UR	13391180	1.39e-06	0.196874	UR	326	2	13104815	13395238
7	33	GLM	MAF5	SNP	Hexyl acetate_UR	13391180	1.39e-06	0.196874	UR	326	2	13104815	13395238
5	78	MLM	MAF5	SNP	Hexyl acetate_UR	36536724	1.44e-06	0.200066	UR	714	1	36536724	36689750
3	NA	MLM	MAF5	SNP	Hexyl acetate_UR	24877497	1.59e-06	0.198762	UR	292	1	24877497	24877497
6	17	MLM	MAF5	SNP	Hexyl acetate_UR	5118883	1.63e-06	0.19845	UR	114	1	4280030	5627934
1	23	MLM	G7	SNP	Hexyl acetate_UR	6632412	1.64e-06	0.199984	UR	218	3	6381788	6674915
2	NA	GLM	G7	SNP	Hexyl acetate_UR	3144240	1.73e-06	0.194024	UR	156	1	3144240	3144240
2	NA	GLM	MAF5	SNP	Hexyl acetate_UR	3144240	1.73e-06	0.194024	UR	156	1	3144240	3144240
7	NA	GLM	G7	SNP	Hexyl acetate_UR	21036078	1.74e-06	0.194004	UR	367	1	21036078	21036078
7	NA	GLM	MAF5	SNP	Hexyl acetate_UR	21036078	1.74e-06	0.194004	UR	367	1	21036078	21036078
2	32	GLM	G7	SNP	Hexyl acetate_UR	4901678	1.75e-06	0.193862	UR	234	1	4901678	5954795
2	32	GLM	MAF5	SNP	Hexyl acetate_UR	4901678	1.75e-06	0.193862	UR	234	1	4901678	5954795
2	NA	GLM	G7	SNP	Hexyl acetate_UR	3733575	1.83e-06	0.193294	UR	182	1	3733575	3733575
2	NA	GLM	MAF5	SNP	Hexyl acetate_UR	3733575	1.83e-06	0.193294	UR	182	1	3733575	3733575
3	34	MLM	G7	SNP	Hexyl acetate_UR	25484355	1.94e-06	0.197781	UR	313	1	25403491	25676809
2	NA	MLM	G7	SNP	Hexyl acetate_UR	1570411	1.99e-06	0.197422	UR	86	1	1570411	1570411
3	32	MLM	G7	SNP	Hexyl acetate_UR	25022376	2.25e-06	0.195792	UR	297	1	24975420	25339701
5	NA	GLM	G7	SNP	Hexyl acetate_UR	33876012	2.41e-06	0.189692	UR	619	1	33876012	33876012
5	NA	GLM	MAF5	SNP	Hexyl acetate_UR	33876012	2.41e-06	0.189692	UR	619	1	33876012	33876012
5	68	GLM	G7	SNP	Hexyl acetate_UR	34194247	2.41e-06	0.189694	UR	623	1	33876014	34194247
5	70	GLM	G7	SNP	Hexyl acetate_UR	34278277	2.41e-06	0.189693	UR	627	2	34265242	34278277
5	70	GLM	MAF5	SNP	Hexyl acetate_UR	34278277	2.41e-06	0.189693	UR	627	2	34265242	34278277
5	79	GLM	G7	SNP	Hexyl acetate_UR	36717936	2.47e-06	0.189364	UR	721	1	36717936	36734659
5	79	GLM	MAF5	SNP	Hexyl acetate_UR	36717936	2.47e-06	0.189364	UR	721	1	36717936	36734659
2	NA	GLM	G7	SNP	Hexyl acetate_UR	4762045	2.55e-06	0.188934	UR	229	1	4762045	4762045
2	NA	GLM	MAF5	SNP	Hexyl acetate_UR	4762045	2.55e-06	0.188934	UR	229	1	4762045	4762045
1	NA	MLM	G7	SNP	Hexyl acetate_UR	15635412	2.57e-06	0.193997	UR	399	1	15635412	15635412
3	55	MLM	MAF5	SNP	Hexyl acetate_UR	30636551	2.59e-06	0.192278	UR	544	1	30271279	30948946
5	83	GLM	G7	SNP	Hexyl acetate_UR	37851544	2.68e-06	0.188306	UR	770	3	37796878	37867770
5	83	GLM	MAF5	SNP	Hexyl acetate_UR	37851544	2.68e-06	0.188306	UR	770	3	37796878	37867770
2	NA	GLM	G7	SNP	Hexyl acetate_UR	3108101	2.7e-06	0.188208	UR	153	1	3108101	3108101
2	NA	GLM	MAF5	SNP	Hexyl acetate_UR	3108101	2.7e-06	0.188208	UR	153	1	3108101	3108101
7	25	GLM	G7	SNP	Hexyl acetate_UR	5866286	2.73e-06	0.188044	UR	233	1	5866286	5866352
7	25	GLM	MAF5	SNP	Hexyl acetate_UR	5866286	2.73e-06	0.188044	UR	233	1	5866286	5866352
7	NA	GLM	G7	SNP	Hexyl acetate_UR	11759339	2.96e-06	0.186993	UR	319	1	11759339	11759339
7	NA	GLM	MAF5	SNP	Hexyl acetate_UR	11759339	2.96e-06	0.186993	UR	319	1	11759339	11759339
1	26	MLM	MAF5	SNP	Hexyl acetate_UR	7823409	3e-06	0.190306	UR	245	2	6834165	7942921
2	31	MLM	G7	SNP	Hexyl acetate_UR	4821878	3.03e-06	0.191761	UR	231	2	4808252	4821878
2	NA	MLM	G7	SNP	Hexyl acetate_UR	4133063	3.21e-06	0.190984	UR	201	1	4133063	4133063
1	18	MLM	MAF5	SNP	Hexyl acetate_UR	5554540	3.27e-06	0.189161	UR	175	1	5356899	5820933
3	NA	GLM	G7	SNP	Hexyl acetate_UR	29479595	3.72e-06	0.183962	UR	485	1	29479595	29479595
3	NA	GLM	MAF5	SNP	Hexyl acetate_UR	29479595	3.72e-06	0.183962	UR	485	1	29479595	29479595
6	67	GLM	G7	SNP	Hexyl acetate_UR	25664581	3.99e-06	0.183025	UR	525	1	25640726	25664581
6	67	GLM	MAF5	SNP	Hexyl acetate_UR	25664581	3.99e-06	0.183025	UR	525	1	25640726	25664581
1	23	MLM	MAF5	SNP	Hexyl acetate_UR	6632412	4e-06	0.186454	UR	218	4	6381788	6674915
5	NA	MLM	MAF5	SNP	Hexyl acetate_UR	32108014	4.18e-06	0.185863	UR	560	1	32108014	32108014
1	21	MLM	MAF5	SNP	Hexyl acetate_UR	5940526	4.38e-06	0.185234	UR	192	3	5940526	6204028
9	5	MLM	MAF5	SNP	Hexyl acetate_UR	1088620	4.58e-06	0.184627	UR	40	1	1088620	1099704
9	6	MLM	MAF5	SNP	Hexyl acetate_UR	1149253	4.7e-06	0.184276	UR	46	2	1109358	1233013
7	NA	MLM	G7	SNP	Hexyl acetate_UR	12090167	4.82e-06	0.185449	UR	322	1	12090167	12090167
2	NA	MLM	MAF5	SNP	Hexyl acetate_UR	4133063	4.87e-06	0.183797	UR	201	1	4133063	4133063
6	47	MLM	MAF5	SNP	Hexyl acetate_UR	21473498	5.05e-06	0.183304	UR	363	3	21458845	21577257
6	44	MLM	G7	SNP	Hexyl acetate_UR	21024554	5.16e-06	0.184529	UR	350	1	21024550	21024554
7	36	GLM	G7	SNP	Hexyl acetate_UR	20608012	5.24e-06	0.179381	UR	363	1	20291937	20608012
7	36	GLM	MAF5	SNP	Hexyl acetate_UR	20608012	5.24e-06	0.179381	UR	363	1	20291937	20608012
1	NA	MLM	MAF5	SNP	Hexyl acetate_UR	5836703	5.42e-06	0.182344	UR	183	1	5836703	5836703
6	47	MLM	G7	SNP	Hexyl acetate_UR	21473498	5.47e-06	0.183722	UR	363	3	21458845	21577257
3	NA	MLM	G7	SNP	Hexyl acetate_UR	24877497	5.56e-06	0.183498	UR	292	1	24877497	24877497
7	30	MLM	G7	SNP	Hexyl acetate_UR	9568389	5.73e-06	0.183094	UR	289	1	9499758	9942258
7	NA	MLM	MAF5	SNP	Hexyl acetate_UR	12090167	5.89e-06	0.181223	UR	322	1	12090167	12090167
9	20	MLM	MAF5	SNP	Hexyl acetate_UR	5545890	6.37e-06	0.180163	UR	219	3	5327028	6165415
2	13	MLM	G7	SNP	Hexyl acetate_UR	1116324	6.39e-06	0.181603	UR	71	2	1065901	1181828
2	15	MLM	G7	SNP	Hexyl acetate_UR	1276161	6.39e-06	0.181603	UR	80	1	1276161	1280783
1	21	MLM	G7	SNP	Hexyl acetate_UR	5940526	7.18e-06	0.180003	UR	192	1	5940526	6204028
5	76	MLM	G7	SNP	Hexyl acetate_UR	36142436	7.32e-06	0.179746	UR	699	3	35928139	36176605
3	55	MLM	G7	SNP	Hexyl acetate_UR	30636551	7.57e-06	0.179287	UR	544	1	30271279	30948946
3	49	MLM	MAF5	SNP	Hexyl acetate_UR	28498827	7.59e-06	0.177778	UR	453	1	28465056	29372073
7	NA	GLM	G7	SNP	Hexyl acetate_UR	20254265	7.61e-06	0.174402	UR	361	1	20254265	20254265
7	NA	GLM	MAF5	SNP	Hexyl acetate_UR	20254265	7.61e-06	0.174402	UR	361	1	20254265	20254265
2	NA	GLM	G7	SNP	Hexyl acetate_UR	4133063	7.62e-06	0.174378	UR	201	1	4133063	4133063
2	NA	GLM	MAF5	SNP	Hexyl acetate_UR	4133063	7.62e-06	0.174378	UR	201	1	4133063	4133063
1	NA	MLM	G7	SNP	Hexyl acetate_UR	5836703	7.84e-06	0.178792	UR	183	1	5836703	5836703
6	44	MLM	MAF5	SNP	Hexyl acetate_UR	21024554	7.84e-06	0.177334	UR	350	1	21024550	21024554
5	NA	MLM	G7	SNP	Hexyl acetate_UR	36193143	7.9e-06	0.178704	UR	701	1	36193143	36193143
1	18	MLM	G7	SNP	Hexyl acetate_UR	5554540	8.02e-06	0.178487	UR	175	1	5356899	5820933
2	10	GLM	G7	SNP	Hexyl acetate_UR	822086	8.06e-06	0.173619	UR	51	1	822086	826749
2	10	GLM	MAF5	SNP	Hexyl acetate_UR	822086	8.06e-06	0.173619	UR	51	1	822086	826749
2	12	GLM	G7	SNP	Hexyl acetate_UR	965671	8.06e-06	0.173623	UR	65	1	939126	1030788
2	12	GLM	MAF5	SNP	Hexyl acetate_UR	965671	8.06e-06	0.173623	UR	65	1	939126	1030788
7	NA	GLM	G7	SNP	Hexyl acetate_UR	7886257	8.27e-06	0.173275	UR	268	1	7886257	7886257
7	NA	GLM	MAF5	SNP	Hexyl acetate_UR	7886257	8.27e-06	0.173275	UR	268	1	7886257	7886257
3	NA	MLM	MAF5	SNP	Hexyl acetate_UR	29479595	8.51e-06	0.176218	UR	485	1	29479595	29479595
2	NA	GLM	G7	SNP	Hexyl acetate_UR	1633184	8.56e-06	0.172817	UR	90	1	1633184	1633184
2	NA	GLM	MAF5	SNP	Hexyl acetate_UR	1633184	8.56e-06	0.172817	UR	90	1	1633184	1633184
2	18	GLM	G7	SNP	Hexyl acetate_UR	1676211	8.56e-06	0.172816	UR	93	2	1676118	1676211
2	18	GLM	MAF5	SNP	Hexyl acetate_UR	1676211	8.56e-06	0.172816	UR	93	2	1676118	1676211
7	NA	MLM	G7	SNP	Hexyl acetate_UR	20627197	8.58e-06	0.177553	UR	364	1	20627197	20627197
5	NA	GLM	G7	SNP	Hexyl acetate_UR	30293820	8.63e-06	0.17271	UR	507	1	30293820	30293820
5	NA	GLM	MAF5	SNP	Hexyl acetate_UR	30293820	8.63e-06	0.17271	UR	507	1	30293820	30293820
2	NA	MLM	G7	SNP	Hexyl acetate_UR	4338993	8.83e-06	0.177159	UR	209	1	4338993	4338993
2	NA	GLM	G7	SNP	Hexyl acetate_UR	4338993	8.9e-06	0.17229	UR	209	1	4338993	4338993
2	NA	GLM	MAF5	SNP	Hexyl acetate_UR	4338993	8.9e-06	0.17229	UR	209	1	4338993	4338993
3	NA	GLM	MAF5	SNP	Hexyl acetate_UR	31090298	8.97e-06	0.172185	UR	569	1	31090298	31090298
7	30	MLM	MAF5	SNP	Hexyl acetate_UR	9568389	9.31e-06	0.174988	UR	289	1	9499758	9942258
2	NA	MLM	MAF5	SNP	Hexyl acetate_UR	4338993	9.34e-06	0.174939	UR	209	1	4338993	4338993
6	64	GLM	G7	SNP	Hexyl acetate_UR	24659299	9.46e-06	0.171474	UR	495	3	23913803	25147021
6	64	GLM	MAF5	SNP	Hexyl acetate_UR	24659299	9.46e-06	0.171474	UR	495	3	23913803	25147021
2	NA	GLM	G7	SNP	Hexyl acetate_UR	4003755	9.62e-06	0.171251	UR	197	1	4003755	4003755
2	NA	GLM	MAF5	SNP	Hexyl acetate_UR	4003755	9.62e-06	0.171251	UR	197	1	4003755	4003755
7	NA	GLM	G7	SNP	Hexyl acetate_UR	9499357	9.67e-06	0.171178	UR	285	1	9499357	9499357
7	NA	GLM	MAF5	SNP	Hexyl acetate_UR	9499357	9.67e-06	0.171178	UR	285	1	9499357	9499357
5	NA	MLM	MAF5	SNP	Hexyl acetate_UR	24187961	9.92e-06	0.174118	UR	356	1	24187961	24187961
7	NA	MLM	MAF5	SNP	Hexyl acetate_UR	20627197	9.93e-06	0.174097	UR	364	1	20627197	20627197
5	NA	MLM	MAF5	SNP	Hexyl acetate_UR	32284769	9.99e-06	0.174017	UR	568	1	32284769	32284769
5	NA	GLM	G7	SNP	Hexyl acetate_UR	38285937	1e-05	0.170726	UR	796	1	38285937	38285937
5	NA	GLM	MAF5	SNP	Hexyl acetate_UR	38285937	1e-05	0.170726	UR	796	1	38285937	38285937
5	49	MLM	G7	SNP	Hexyl acetate_UR	29150824	1.02e-05	0.175112	UR	459	1	28530169	29395287
5	80	GLM	G7	SNP	Hexyl acetate_UR	37062069	1.02e-05	0.170444	UR	733	1	37045633	37062069
5	80	GLM	MAF5	SNP	Hexyl acetate_UR	37062069	1.02e-05	0.170444	UR	733	1	37045633	37062069
2	NA	MLM	G7	SNP	Hexyl acetate_UR	501121	1.07e-05	0.174567	UR	34	1	501121	501121
5	77	MLM	G7	SNP	Hexyl acetate_UR	36345121	1.07e-05	0.174515	UR	707	1	36299101	36438628
3	51	GLM	G7	SNP	Hexyl acetate_UR	29658860	1.09e-05	0.169529	UR	493	1	29479613	29720600
3	51	GLM	MAF5	SNP	Hexyl acetate_UR	29658860	1.09e-05	0.169529	UR	493	1	29479613	29720600
5	NA	MLM	G7	SNP	Hexyl acetate_UR	32284769	1.1e-05	0.174119	UR	568	1	32284769	32284769
5	82	GLM	G7	SNP	Hexyl acetate_UR	37593471	1.11e-05	0.169316	UR	756	1	37593471	37755711
5	82	GLM	MAF5	SNP	Hexyl acetate_UR	37593471	1.11e-05	0.169316	UR	756	1	37593471	37755711
5	85	GLM	G7	SNP	Hexyl acetate_UR	38009862	1.11e-05	0.169341	UR	781	1	38009862	38161832
5	85	GLM	MAF5	SNP	Hexyl acetate_UR	38009862	1.11e-05	0.169341	UR	781	1	38009862	38161832
5	82	MLM	G7	SNP	Hexyl acetate_UR	37593471	1.13e-05	0.17381	UR	756	1	37593471	37755711
3	NA	MLM	G7	SNP	Hexyl acetate_UR	7184568	1.2e-05	0.172883	UR	142	1	7184568	7184568
7	NA	MLM	MAF5	SNP	Hexyl acetate_UR	19532894	1.25e-05	0.170993	UR	358	1	19532894	19532894
3	57	GLM	MAF5	SNP	Hexyl acetate_UR	31234827	1.27e-05	0.167457	UR	576	2	31156760	31273833
1	NA	GLM	G7	SNP	Hexyl acetate_UR	27991540	1.28e-05	0.142863	UR	NA	1	27991540	27991540
6	NA	MLM	MAF5	SNP	Hexyl acetate_UR	20672979	1.31e-05	0.170304	UR	334	1	20672979	20672979
3	56	GLM	MAF5	SNP	Hexyl acetate_UR	31073768	1.41e-05	0.166046	UR	567	1	31073768	31080756
7	NA	GLM	G7	SNP	Hexyl acetate_UR	12046477	1.41e-05	0.166082	UR	321	1	12046477	12046477
7	NA	GLM	MAF5	SNP	Hexyl acetate_UR	12046477	1.41e-05	0.166082	UR	321	1	12046477	12046477
7	NA	MLM	G7	SNP	Hexyl acetate_UR	5837217	1.42e-05	0.170573	UR	231	1	5837217	5837217
3	49	MLM	G7	SNP	Hexyl acetate_UR	28498827	1.43e-05	0.170521	UR	453	1	28465056	29372073
7	29	MLM	G7	SNP	Hexyl acetate_UR	9095848	1.44e-05	0.170428	UR	282	1	8409460	9133926
7	29	MLM	MAF5	SNP	Hexyl acetate_UR	8670208	1.46e-05	0.168854	UR	275	2	8409460	9133926
1	NA	GLM	G7	SNP	Hexyl acetate_UR	19598076	1.56e-05	0.140286	UR	NA	1	19598076	19598076
5	NA	GLM	G7	SNP	Hexyl acetate_UR	37021030	1.58e-05	0.164554	UR	730	1	37021030	37021030
5	NA	GLM	MAF5	SNP	Hexyl acetate_UR	37021030	1.58e-05	0.164554	UR	730	1	37021030	37021030
9	3	MLM	G7	SNP	Hexyl acetate_UR	458738	1.88e-05	0.166673	UR	19	1	281991	598128
10	57	MLM	G7	SNP	Hexyl acetate_UR	21664591	1.91e-05	0.166486	UR	419	1	21664591	21781099
6	17	GLM	G7	SNP	Linalol_R	5543124	5.57e-06	0.156163	R	NA	1	4280030	5627934
6	17	MLM	G7	SNP	Linalol_R	5543058	8.58e-06	0.155306	R	NA	1	4280030	5627934
10	27	GLM	NA	SSR	Linalool cis pyranic oxide_UR	6167221	3.27e-07	0.231145	UR	SSR	1	6023982	6718126
10	NA	GLM	MAF5	SNP	Linalool cis pyranic oxide_UR	2568794	6.47e-07	0.20684	UR	73	1	2568794	2568794
2	35	GLM	G7	SNP	Linalool cis pyranic oxide_UR	7151951	9.02e-07	0.202538	UR	301	1	6579096	7156137
2	35	GLM	MAF5	SNP	Linalool cis pyranic oxide_UR	7151951	9.02e-07	0.202538	UR	301	1	6579096	7156137
9	24	GLM	G7	SNP	Linalool cis pyranic oxide_UR	6937260	1.32e-06	0.172535	UR	NA	1	6851452	7232130
10	14	GLM	G7	SNP	Linalool cis pyranic oxide_UR	3444619	3.1e-06	0.161504	UR	104	1	3146251	3444679
10	14	GLM	MAF5	SNP	Linalool cis pyranic oxide_UR	3444619	3.1e-06	0.161504	UR	104	1	3146251	3444679
10	NA	GLM	G7	SNP	Linalool cis pyranic oxide_UR	5581868	3.1e-06	0.186368	UR	184	1	5581868	5581868
10	NA	GLM	MAF5	SNP	Linalool cis pyranic oxide_UR	5581868	3.1e-06	0.186368	UR	184	1	5581868	5581868
3	NA	GLM	NA	SSR	Linalool cis pyranic oxide_UR	14462884	3.84e-06	0.187499	UR	SSR	1	14462884	14462884
10	NA	GLM	G7	SNP	Linalool cis pyranic oxide_UR	5605104	4.59e-06	0.181147	UR	185	1	5605104	5605104
10	NA	GLM	MAF5	SNP	Linalool cis pyranic oxide_UR	5605104	4.59e-06	0.181147	UR	185	1	5605104	5605104
10	25	GLM	G7	SNP	Linalool cis pyranic oxide_UR	5047733	4.66e-06	0.18097	UR	171	1	5047729	5053844
10	25	GLM	MAF5	SNP	Linalool cis pyranic oxide_UR	5047733	4.66e-06	0.18097	UR	171	1	5047729	5053844
4	NA	GLM	G7	SNP	Linalool cis pyranic oxide_UR	21895865	5.2e-06	0.154737	UR	313	1	21895865	21895865
4	NA	GLM	MAF5	SNP	Linalool cis pyranic oxide_UR	21895865	5.2e-06	0.154737	UR	313	1	21895865	21895865
1	63	GLM	G7	SNP	Linalool cis pyranic oxide_UR	29524924	5.42e-06	0.154189	UR	567	1	29523121	29527052
1	63	GLM	MAF5	SNP	Linalool cis pyranic oxide_UR	29524924	5.42e-06	0.154189	UR	567	1	29523121	29527052
10	26	GLM	G7	SNP	Linalool cis pyranic oxide_UR	5419006	5.89e-06	0.153101	UR	183	2	5153882	5419006
10	26	GLM	MAF5	SNP	Linalool cis pyranic oxide_UR	5419006	5.89e-06	0.153101	UR	183	2	5153882	5419006
10	12	GLM	MAF5	SNP	Linalool cis pyranic oxide_UR	2697554	7.14e-06	0.175247	UR	79	3	2623845	2925508
10	NA	GLM	G7	SNP	Linalool cis pyranic oxide_UR	4899660	7.54e-06	0.174514	UR	168	1	4899660	4899660
10	NA	GLM	MAF5	SNP	Linalool cis pyranic oxide_UR	4899660	7.54e-06	0.174514	UR	168	1	4899660	4899660
2	39	GLM	NA	SSR	Linalool cis pyranic oxide_UR	8389914	1.01e-05	0.155169	UR	SSR	1	8239972	8416672
10	12	GLM	G7	SNP	Linalool cis pyranic oxide_UR	2909578	1.05e-05	0.145532	UR	84	1	2623845	2925508
3	NA	GLM	G7	SNP	Linalool cis pyranic oxide_UR	14448836	1.11e-05	0.169294	UR	196	1	14448836	14448836
3	NA	GLM	MAF5	SNP	Linalool cis pyranic oxide_UR	14448836	1.11e-05	0.169294	UR	196	1	14448836	14448836
10	27	GLM	G7	SNP	Linalool cis pyranic oxide_UR	6437844	1.11e-05	0.144764	UR	189	1	6023982	6718126
10	27	GLM	MAF5	SNP	Linalool cis pyranic oxide_UR	6437844	1.11e-05	0.144764	UR	189	1	6023982	6718126
3	30	GLM	G7	SNP	Linalool cis pyranic oxide_UR	23469318	1.12e-05	0.169247	UR	264	1	22556875	23659956
3	30	GLM	MAF5	SNP	Linalool cis pyranic oxide_UR	23469318	1.12e-05	0.169247	UR	264	1	22556875	23659956
3	29	GLM	G7	SNP	Linalool cis pyranic oxide_UR	21359515	1.17e-05	0.168615	UR	245	1	20869946	22404839
3	29	GLM	MAF5	SNP	Linalool cis pyranic oxide_UR	21359515	1.17e-05	0.168615	UR	245	1	20869946	22404839
9	24	MLM	G7	SNP	Linalool cis pyranic oxide_UR	6937243	1.34e-05	0.137668	UR	NA	1	6851452	7232130
10	24	GLM	G7	SNP	Linalool cis pyranic oxide_UR	4487439	1.5e-05	0.165267	UR	161	1	4462717	4610049
10	24	GLM	MAF5	SNP	Linalool cis pyranic oxide_UR	4487439	1.5e-05	0.165267	UR	161	1	4462717	4610049
10	20	GLM	G7	SNP	Linalool cis pyranic oxide_UR	4122169	1.59e-05	0.139998	UR	143	1	4117628	4122169
2	57	GLM	G7	SNP	Linalool cis pyranic oxide_UR	29867634	1.8e-05	0.162734	UR	563	1	27852246	29867634
2	37	GLM	G7	SNP	Linalool cis pyranic oxide_UR	7899353	1.84e-05	0.162481	UR	333	1	7812200	8143718
7	28	GLM	NA	SSR	Linalool cis pyranic oxide_UR	6563143	1.91e-05	0.130056	UR	SSR	1	6535097	7472668
6	NA	GLM	NA	SSR	Linalool cis pyranic oxide_UR	218625	3.34e-05	0.150248	UR	SSR	1	218625	218625
7	27	GLM	NA	SSR	Linalool cis pyranic oxide_UR	6181185	4.26e-05	0.149364	UR	SSR	1	6128106	6410151
1	55	GLM	NA	SSR	Linalool cis pyranic oxide_UR	26839633	4.53e-05	0.140372	UR	SSR	1	26665574	26852249
2	34	GLM	NA	SSR	Linalool cis pyranic oxide_UR	6500653	6.92e-05	0.134462	UR	SSR	1	6444089	6563390
9	43	GLM	NA	SSR	Linalool cis pyranic oxide_UR	32460654	0.000109	0.129801	UR	SSR	1	31280541	32524790
6	NA	GLM	NA	SSR	Linalool cis pyranic oxide_UR	3884725	0.000119	0.114986	UR	SSR	1	3884725	3884725
1	62	GLM	NA	SSR	Linalool cis pyranic oxide_UR	29400555	0.000181	0.119236	UR	SSR	1	29363440	29443506
4	28	GLM	NA	SSR	Linalool cis pyranic oxide_UR	16297711	0.000186	0.133235	UR	SSR	1	15421975	16348316
1	NA	GLM	NA	SSR	Linalool cis pyranic oxide_UR	24614721	0.000265	0.102705	UR	SSR	1	24614721	24614721
7	24	GLM	MAF5	SNP	Linalool trans furanic oxyde_UR	5607833	5.51e-10	0.292948	UR	220	4	5596523	5648293
7	23	GLM	MAF5	SNP	Linalool trans furanic oxyde_UR	5508567	9.21e-09	0.259819	UR	216	3	5508489	5509061
7	31	GLM	MAF5	SNP	Linalool trans furanic oxyde_UR	10459413	9.31e-09	0.259693	UR	304	1	10032134	11286123
7	NA	GLM	MAF5	SNP	Linalool trans furanic oxyde_UR	5359388	1.23e-08	0.256357	UR	212	1	5359388	5359388
6	NA	GLM	NA	SSR	Linalool trans furanic oxyde_UR	218625	4.71e-08	0.221594	UR	SSR	1	218625	218625
7	NA	GLM	MAF5	SNP	Linalool trans furanic oxyde_UR	4776442	3.26e-07	0.215609	UR	196	1	4776442	4776442
5	64	GLM	MAF5	SNP	Linalool trans furanic oxyde_UR	33303465	3.42e-07	0.215015	UR	592	1	32660102	33718239
7	NA	GLM	MAF5	SNP	Linalool trans furanic oxyde_UR	4747857	3.56e-07	0.214504	UR	195	1	4747857	4747857
7	21	GLM	MAF5	SNP	Linalool trans furanic oxyde_UR	4831886	4.2e-07	0.212387	UR	199	1	4824487	4831886
1	82	GLM	G7	SNP	Linalool trans furanic oxyde_UR	34378926	4.73e-07	0.210876	UR	760	1	34339517	34392040
1	82	GLM	MAF5	SNP	Linalool trans furanic oxyde_UR	34378926	4.73e-07	0.210876	UR	760	1	34339517	34392040
7	NA	GLM	MAF5	SNP	Linalool trans furanic oxyde_UR	5316380	7.05e-07	0.205733	UR	210	1	5316380	5316380
3	69	GLM	G7	SNP	Linalool trans furanic oxyde_UR	35619473	1.11e-06	0.199876	UR	742	2	35617075	35720227
3	69	GLM	MAF5	SNP	Linalool trans furanic oxyde_UR	35619473	1.11e-06	0.199876	UR	742	2	35617075	35720227
1	NA	GLM	G7	SNP	Linalool trans furanic oxyde_UR	34399566	1.93e-06	0.192591	UR	762	1	34399566	34399566
1	NA	GLM	MAF5	SNP	Linalool trans furanic oxyde_UR	34399566	1.93e-06	0.192591	UR	762	1	34399566	34399566
3	62	GLM	MAF5	SNP	Linalool trans furanic oxyde_UR	32411946	2.86e-06	0.187411	UR	624	2	32075624	33514225
3	72	GLM	MAF5	SNP	Linalool trans furanic oxyde_UR	35843732	2.9e-06	0.18726	UR	754	1	35842629	35847669
3	73	GLM	MAF5	SNP	Linalool trans furanic oxyde_UR	35859435	3.18e-06	0.186012	UR	758	2	35855119	35878999
10	37	GLM	MAF5	SNP	Linalool trans furanic oxyde_UR	14723122	3.87e-06	0.183433	UR	267	2	14524131	15403878
10	37	GLM	G7	SNP	Linalool trans furanic oxyde_UR	14800231	3.99e-06	0.183025	UR	268	1	14524131	15403878
10	36	GLM	G7	SNP	Linalool trans furanic oxyde_UR	14239071	6.5e-06	0.176516	UR	259	1	13349399	14327326
10	36	GLM	MAF5	SNP	Linalool trans furanic oxyde_UR	14239071	6.5e-06	0.176516	UR	259	1	13349399	14327326
9	24	GLM	MAF5	SNP	Linalool trans furanic oxyde_UR	6954494	7.14e-06	0.175262	UR	280	1	6851452	7232130
9	NA	GLM	G7	SNP	Linalool trans furanic oxyde_UR	32646331	7.29e-06	0.1503	UR	537	1	32646331	32646331
9	NA	GLM	MAF5	SNP	Linalool trans furanic oxyde_UR	32646331	7.29e-06	0.1503	UR	537	1	32646331	32646331
10	43	GLM	MAF5	SNP	Linalool trans furanic oxyde_UR	18049530	7.88e-06	0.173931	UR	318	1	18040987	18049530
5	45	GLM	MAF5	SNP	Linalool trans furanic oxyde_UR	27778596	1.03e-05	0.170337	UR	422	2	27513741	28030599
7	24	MLM	MAF5	SNP	Linalool trans furanic oxyde_UR	5607833	1.04e-05	0.172001	UR	220	2	5596523	5648293
7	2	GLM	G7	SNP	Linalool trans furanic oxyde_UR	494364	1.06e-05	0.169965	UR	28	2	196804	747529
7	2	GLM	MAF5	SNP	Linalool trans furanic oxyde_UR	496313	1.06e-05	0.169965	UR	29	5	196804	747529
5	81	GLM	NA	SSR	Linalool trans furanic oxyde_UR	37158877	1.07e-05	0.148884	UR	SSR	1	37076966	37549697
7	NA	GLM	MAF5	SNP	Linalool trans furanic oxyde_UR	14865124	1.11e-05	0.169373	UR	346	1	14865124	14865124
10	NA	GLM	G7	SNP	Linalool trans furanic oxyde_UR	19705234	1.14e-05	0.168932	UR	359	1	19705234	19705234
10	NA	GLM	MAF5	SNP	Linalool trans furanic oxyde_UR	19705234	1.14e-05	0.168932	UR	359	1	19705234	19705234
3	64	GLM	MAF5	SNP	Linalool trans furanic oxyde_UR	33815337	1.26e-05	0.167631	UR	665	1	33781383	33974278
3	NA	GLM	MAF5	SNP	Linalool trans furanic oxyde_UR	35461657	1.3e-05	0.167149	UR	736	1	35461657	35461657
5	77	GLM	G7	SNP	Linalool trans furanic oxyde_UR	36438628	1.4e-05	0.166129	UR	712	1	36299101	36438628
5	77	GLM	MAF5	SNP	Linalool trans furanic oxyde_UR	36438628	1.4e-05	0.166129	UR	712	1	36299101	36438628
3	62	GLM	NA	SSR	Linalool trans furanic oxyde_UR	32501489	3.03e-05	0.148771	UR	SSR	1	32075624	33514225
6	NA	GLM	NA	SSR	Linalool trans furanic oxyde_UR	3884725	4.72e-05	0.125931	UR	SSR	1	3884725	3884725
9	14	GLM	NA	SSR	Linalool trans furanic oxyde_UR	3721559	4.81e-05	0.103323	UR	SSR	2	3143509	3836079
9	NA	GLM	NA	SSR	Linalool trans furanic oxyde_UR	6355360	8.3e-05	0.13735	UR	SSR	1	6355360	6355360
3	55	GLM	NA	SSR	Linalool trans furanic oxyde_UR	30737092	8.74e-05	0.174415	UR	SSR	2	30271279	30948946
5	33	GLM	NA	SSR	Linalool trans furanic oxyde_UR	8269186	0.000131	0.144443	UR	SSR	1	7385446	9269878
9	25	GLM	NA	SSR	Linalool trans furanic oxyde_UR	7596341	0.000243	0.112094	UR	SSR	1	7542185	7622307
7	31	GLM	MAF5	SNP	Linalool_UR	10459413	3.53e-13	0.372642	UR	304	2	10032134	11286123
7	31	MLM	MAF5	SNP	Linalool_UR	10459413	6.36e-10	0.294454	UR	304	1	10032134	11286123
5	64	GLM	MAF5	SNP	Linalool_UR	33303465	3.52e-08	0.243499	UR	592	1	32660102	33718239
7	NA	GLM	MAF5	SNP	Linalool_UR	7802055	8.93e-08	0.231972	UR	265	1	7802055	7802055
10	NA	GLM	G7	SNP	Linalool_UR	20797851	9.04e-08	0.206506	UR	NA	1	20797851	20797851
7	28	GLM	MAF5	SNP	Linalool_UR	7468506	1.05e-07	0.229909	UR	259	2	6535097	7472668
7	NA	GLM	MAF5	SNP	Linalool_UR	14865124	4.88e-07	0.210463	UR	346	1	14865124	14865124
5	NA	GLM	G7	SNP	Linalool_UR	30276019	1.22e-06	0.19863	UR	505	1	30276019	30276019
5	NA	GLM	MAF5	SNP	Linalool_UR	30276019	1.22e-06	0.19863	UR	505	1	30276019	30276019
5	NA	GLM	G7	SNP	Linalool_UR	30365664	1.25e-06	0.198263	UR	509	1	30365664	30365664
5	NA	GLM	MAF5	SNP	Linalool_UR	30365664	1.25e-06	0.198263	UR	509	1	30365664	30365664
5	60	GLM	MAF5	SNP	Linalool_UR	31854741	1.41e-06	0.196722	UR	551	6	30954482	32047092
10	54	GLM	MAF5	SNP	Linalool_UR	21100735	1.76e-06	0.193791	UR	392	1	21064270	21230086
5	NA	GLM	MAF5	SNP	Linalool_UR	32141427	2.15e-06	0.1912	UR	562	1	32141427	32141427
5	77	GLM	G7	SNP	Linalool_UR	36438628	2.3e-06	0.190294	UR	712	1	36299101	36438628
5	77	GLM	MAF5	SNP	Linalool_UR	36438628	2.3e-06	0.190294	UR	712	1	36299101	36438628
7	24	GLM	MAF5	SNP	Linalool_UR	5596523	2.6e-06	0.188672	UR	219	2	5596523	5648293
5	NA	GLM	MAF5	SNP	Linalool_UR	30168620	2.84e-06	0.187538	UR	497	1	30168620	30168620
5	81	GLM	G7	SNP	Linalool_UR	37266592	3.49e-06	0.1848	UR	749	1	37076966	37549697
5	81	GLM	MAF5	SNP	Linalool_UR	37266592	3.49e-06	0.1848	UR	749	1	37076966	37549697
5	60	GLM	G7	SNP	Linalool_UR	31099030	3.99e-06	0.183038	UR	537	2	30954482	32047092
5	81	GLM	NA	SSR	Linalool_UR	37158877	4.02e-06	0.160541	UR	SSR	1	37076966	37549697
5	53	GLM	G7	SNP	Linalool_UR	29917500	4.38e-06	0.18178	UR	483	2	29852280	29969218
5	53	GLM	MAF5	SNP	Linalool_UR	29917500	4.38e-06	0.18178	UR	483	1	29852280	29969218
3	55	GLM	G7	SNP	Linalool_UR	30916248	4.4e-06	0.181725	UR	562	1	30271279	30948946
3	55	GLM	MAF5	SNP	Linalool_UR	30916248	4.4e-06	0.181725	UR	562	1	30271279	30948946
7	35	GLM	MAF5	SNP	Linalool_UR	17922140	5.96e-06	0.177683	UR	355	1	17406634	17922175
10	NA	GLM	MAF5	SNP	Linalool_UR	20993672	7.18e-06	0.175171	UR	389	1	20993672	20993672
7	NA	GLM	G7	SNP	Linalool_UR	19532894	8.04e-06	0.173665	UR	358	1	19532894	19532894
7	NA	GLM	MAF5	SNP	Linalool_UR	19532894	8.04e-06	0.173665	UR	358	1	19532894	19532894
5	75	GLM	G7	SNP	Linalool_UR	35676834	9.56e-06	0.171333	UR	679	1	35600426	35853778
5	75	GLM	MAF5	SNP	Linalool_UR	35676834	9.56e-06	0.171333	UR	679	1	35600426	35853778
2	45	MLM	MAF5	SNP	Linalool_UR	10959323	1.13e-05	0.173229	UR	410	1	10827790	11023043
3	31	GLM	MAF5	SNP	Linalool_UR	24409793	1.49e-05	0.165368	UR	272	1	24324879	24734237
6	NA	GLM	NA	SSR	Linalool_UR	218625	0.000186	0.130135	UR	SSR	1	218625	218625
9	54	GLM	MAF5	SNP	Nonanal_UR	37557289	2.45e-07	0.219265	UR	671	3	37065256	37601289
9	54	MLM	MAF5	SNP	Nonanal_UR	37557289	2.49e-06	0.188027	UR	671	1	37065256	37601289
3	NA	GLM	MAF5	SNP	Nonanal_UR	13485764	4.73e-06	0.180771	UR	186	1	13485764	13485764
5	82	GLM	MAF5	SNP	Nonanal_UR	37690495	6.63e-06	0.176252	UR	758	1	37593471	37755711
3	NA	MLM	MAF5	SNP	Nonanal_UR	13485764	7.22e-06	0.168996	UR	186	1	13485764	13485764
3	66	GLM	MAF5	SNP	Nonanal_UR	35246463	1.03e-05	0.170363	UR	716	3	34866251	35290974
7	NA	GLM	MAF5	SNP	Nonanal_UR	5817331	1.12e-05	0.169191	UR	230	1	5817331	5817331
9	NA	GLM	MAF5	SNP	Nonanal_UR	36942540	1.21e-05	0.168199	UR	649	1	36942540	36942540
8	8	GLM	MAF5	SNP	Nonanal_UR	2443913	1.23e-05	0.167944	UR	116	2	2443913	2451555
3	67	GLM	MAF5	SNP	Nonanal_UR	35368037	1.44e-05	0.165779	UR	727	1	35328537	35390997
2	25	GLM	G7	SNP	Nonanal_UR	3365322	1.8e-05	0.162734	UR	171	1	3259782	3596798
6	17	GLM	G7	SNP	Phenylethanal_UR	5543124	1.77e-05	0.138551	UR	NA	1	4280030	5627934

## Sheet: Feuil2
Chromosome	Number of haplotypic bloc	Methode	Markers Sorting	Markers type	Traits	Position of the association peak (bp)	p-value	Explanation rate of the character	Treatment of beans	Haploview marker number	Number of associated markers in the same area	Start position of the association	Position of the end of the association
7	11	GLM	MAF5	SNP	4-Hydroxy-acetophenone_UR	2815797	4.86e-43	0.794895	NT	120	4	2573666	2856874
5	11	GLM	MAF5	SNP	4-Hydroxy-acetophenone_UR	1607606	5.46e-43	0.794508	NT	91	1	1579945	1800602
5	10	GLM	MAF5	SNP	4-Hydroxy-acetophenone_UR	1380802	5.85e-43	0.794275	NT	80	5	1380802	1510054
9	58	GLM	MAF5	SNP	4-Hydroxy-acetophenone_UR	38134588	5.87e-43	0.794264	NT	697	4	38121367	38300579
5	NA	GLM	MAF5	SNP	4-Hydroxy-acetophenone_UR	1529974	6.11e-43	0.79413	NT	87	1	1529974	1529974
5	9	GLM	MAF5	SNP	4-Hydroxy-acetophenone_UR	1353636	6.34e-43	0.794005	NT	76	1	1326444	1374494
5	13	GLM	MAF5	SNP	4-Hydroxy-acetophenone_UR	1992775	8.43e-43	0.793049	NT	111	3	1903641	1992775
5	8	GLM	MAF5	SNP	4-Hydroxy-acetophenone_UR	1254264	8.71e-43	0.79294	NT	73	2	1240815	1254264
5	7	GLM	MAF5	SNP	4-Hydroxy-acetophenone_UR	1240806	8.8e-43	0.792906	NT	70	1	906367	1240806
5	7	MLM	MAF5	SNP	4-Hydroxy-acetophenone_UR	1240806	8.49e-39	0.770741	NT	70	1	906367	1240806
5	NA	MLM	MAF5	SNP	4-Hydroxy-acetophenone_UR	1529974	1.26e-38	0.769218	NT	87	1	1529974	1529974
5	11	MLM	MAF5	SNP	4-Hydroxy-acetophenone_UR	1607606	1.3e-38	0.769083	NT	91	1	1579945	1800602
5	8	MLM	MAF5	SNP	4-Hydroxy-acetophenone_UR	1254264	1.79e-38	0.767878	NT	73	2	1240815	1254264
5	10	MLM	MAF5	SNP	4-Hydroxy-acetophenone_UR	1380802	2e-38	0.767418	NT	80	5	1380802	1510054
9	58	MLM	MAF5	SNP	4-Hydroxy-acetophenone_UR	38134588	2.71e-38	0.766187	NT	697	4	38121367	38300579
5	9	MLM	MAF5	SNP	4-Hydroxy-acetophenone_UR	1353636	2.78e-38	0.766136	NT	76	1	1326444	1374494
5	13	MLM	MAF5	SNP	4-Hydroxy-acetophenone_UR	1992775	3.17e-38	0.765583	NT	111	3	1903641	1992775
7	11	MLM	MAF5	SNP	4-Hydroxy-acetophenone_UR	2815797	4.41e-38	0.764265	NT	120	4	2573666	2856874
5	NA	GLM	MAF5	SNP	4-Hydroxy-acetophenone_UR	1814717	1.87e-18	0.485071	NT	99	1	1814717	1814717
5	NA	MLM	MAF5	SNP	4-Hydroxy-acetophenone_UR	1814717	8.91e-18	0.482123	NT	99	1	1814717	1814717
7	9	MLM	MAF5	SNP	4-Hydroxy-acetophenone_UR	2092063	4.78e-16	0.446177	NT	104	1	1894664	2092063
7	14	GLM	MAF5	SNP	4-Hydroxy-acetophenone_UR	3762508	1.05e-13	0.384919	NT	152	9	3117912	3970760
7	9	GLM	MAF5	SNP	4-Hydroxy-acetophenone_UR	2092063	1.38e-13	0.382154	NT	104	1	1894664	2092063
3	62	MLM	MAF5	SNP	4-Hydroxy-acetophenone_UR	32812724	6.99e-12	0.349802	NT	635	3	32075624	33514225
7	14	MLM	MAF5	SNP	4-Hydroxy-acetophenone_UR	3762508	7.54e-11	0.323436	NT	152	6	3117912	3970760
5	47	GLM	MAF5	SNP	4-Hydroxy-acetophenone_UR	28136247	2.74e-09	0.274269	NT	431	2	28131342	28136247
7	NA	GLM	MAF5	SNP	4-Hydroxy-acetophenone_UR	2238877	1.3e-08	0.25568	NT	108	1	2238877	2238877
5	47	MLM	MAF5	SNP	4-Hydroxy-acetophenone_UR	28136247	1.68e-08	0.259261	NT	431	2	28131342	28136247
1	NA	GLM	MAF5	SNP	4-Hydroxy-acetophenone_UR	32740992	3.41e-08	0.243901	NT	677	1	32740992	32740992
10	6	MLM	G7	SNP	4-Hydroxy-acetophenone_UR	1608234	2.2e-07	0.199212	NT	NA	1	1551551	1610826
10	7	MLM	G7	SNP	4-Hydroxy-acetophenone_UR	1723623	2.2e-07	0.199212	NT	NA	3	1658459	1936656
10	NA	MLM	G7	SNP	4-Hydroxy-acetophenone_UR	1946417	2.2e-07	0.199212	NT	NA	1	1946417	1946417
5	81	MLM	G7	SNP	4-Hydroxy-acetophenone_UR	37434370	3.12e-07	0.194703	NT	NA	1	37076966	37549697
10	4	MLM	G7	SNP	4-Hydroxy-acetophenone_UR	1060594	4.15e-07	0.191013	NT	NA	2	1011689	1172361
10	5	MLM	G7	SNP	4-Hydroxy-acetophenone_UR	1367702	4.15e-07	0.191013	NT	NA	4	1216224	1547566
7	13	GLM	MAF5	SNP	4-Hydroxy-acetophenone_UR	3010540	9.61e-07	0.201711	NT	132	1	2975385	3095657
9	NA	GLM	MAF5	SNP	4-Hydroxy-acetophenone_UR	2802768	1.08e-06	0.200171	NT	106	1	2802768	2802768
5	NA	GLM	MAF5	SNP	4-Hydroxy-acetophenone_UR	15553705	2.18e-06	0.191021	NT	297	1	15553705	15553705
5	42	MLM	G7	SNP	4-Hydroxy-acetophenone_UR	26296614	2.66e-06	0.19206	NT	380	2	24679572	27017453
7	NA	GLM	MAF5	SNP	4-Hydroxy-acetophenone_UR	2238847	3.57e-06	0.184486	NT	107	1	2238847	2238847
2	NA	GLM	G7	SNP	4-Hydroxy-acetophenone_UR	6363858	3.71e-06	0.159151	NT	NA	1	6363858	6363858
2	NA	GLM	G7	SNP	4-Hydroxy-acetophenone_UR	6371226	3.71e-06	0.159151	NT	NA	1	6371226	6371226
7	NA	GLM	MAF5	SNP	4-Hydroxy-acetophenone_UR	2238833	3.81e-06	0.183623	NT	106	1	2238833	2238833
9	61	GLM	MAF5	SNP	4-Hydroxy-acetophenone_UR	38578482	4.24e-06	0.182198	NT	719	1	38540670	38578482
7	NA	GLM	MAF5	SNP	4-Hydroxy-acetophenone_UR	2449401	5.8e-06	0.178043	NT	115	1	2449401	2449401
5	30	GLM	MAF5	SNP	4-Hydroxy-acetophenone_UR	5971240	6.09e-06	0.177384	NT	236	1	5933079	6122894
4	67	MLM	G7	SNP	4-Hydroxy-acetophenone_UR	29801957	6.66e-06	0.154551	NT	NA	1	29641256	29939344
7	NA	MLM	MAF5	SNP	4-Hydroxy-acetophenone_UR	2449401	8.23e-06	0.178256	NT	115	1	2449401	2449401
9	NA	GLM	G7	SNP	4-Hydroxy-acetophenone_UR	3881566	8.57e-06	0.1728	NT	139	1	3881566	3881566
9	NA	GLM	MAF5	SNP	4-Hydroxy-acetophenone_UR	3881566	8.57e-06	0.1728	NT	139	1	3881566	3881566
5	NA	MLM	MAF5	SNP	4-Hydroxy-acetophenone_UR	27089119	9.51e-06	0.176266	NT	402	1	27089119	27089119
5	11	MLM	G7	SNP	4-Hydroxy-acetophenone_UR	1581702	1.18e-05	0.171841	NT	90	1	1579945	1800602
5	45	MLM	MAF5	SNP	4-Hydroxy-acetophenone_UR	27513744	1.41e-05	0.170741	NT	417	1	27513741	28030599
5	42	MLM	MAF5	SNP	4-Hydroxy-acetophenone_UR	27017453	1.53e-05	0.169685	NT	397	1	24679572	27017453
10	26	GLM	G7	SNP	Acetate de 1-phenylethyle_R	5308832	1.17e-10	0.310563	T	182	3	5153882	5419006
10	26	GLM	MAF5	SNP	Acetate de 1-phenylethyle_R	5308832	1.17e-10	0.310563	T	182	3	5153882	5419006
9	14	GLM	MAF5	SNP	Acetate de 1-phenylethyle_R	3653985	1.66e-10	0.30662	T	132	2	3143509	3836079
1	NA	GLM	MAF5	SNP	Acetate de 1-phenylethyle_R	3019175	3.03e-10	0.299778	T	83	1	3019175	3019175
4	51	GLM	MAF5	SNP	Acetate de 1-phenylethyle_R	26876494	3.14e-10	0.299372	T	460	7	26703951	27146370
4	NA	GLM	MAF5	SNP	Acetate de 1-phenylethyle_R	27666259	3.2e-10	0.299174	T	510	1	27666259	27666259
3	NA	GLM	MAF5	SNP	Acetate de 1-phenylethyle_R	35446132	3.46e-10	0.298277	T	734	1	35446132	35446132
4	60	GLM	MAF5	SNP	Acetate de 1-phenylethyle_R	28285175	3.87e-10	0.297014	T	538	2	28257730	28352788
4	56	GLM	MAF5	SNP	Acetate de 1-phenylethyle_R	27985370	4.5e-10	0.295265	T	517	1	27838153	28035296
4	54	GLM	MAF5	SNP	Acetate de 1-phenylethyle_R	27392302	4.82e-10	0.294487	T	497	2	27321177	27486751
4	49	GLM	MAF5	SNP	Acetate de 1-phenylethyle_R	26543385	5.93e-10	0.292107	T	449	4	26543310	26589497
4	NA	GLM	MAF5	SNP	Acetate de 1-phenylethyle_R	27273500	6.16e-10	0.291663	T	491	1	27273500	27273500
4	59	GLM	MAF5	SNP	Acetate de 1-phenylethyle_R	28203905	6.54e-10	0.290979	T	530	3	28203905	28222124
5	30	GLM	MAF5	SNP	Acetate de 1-phenylethyle_R	5955757	6.89e-10	0.290368	T	235	2	5933079	6122894
3	NA	GLM	MAF5	SNP	Acetate de 1-phenylethyle_R	35412158	7.01e-10	0.290172	T	729	1	35412158	35412158
4	NA	GLM	MAF5	SNP	Acetate de 1-phenylethyle_R	27821881	7.79e-10	0.288965	T	512	1	27821881	27821881
4	NA	GLM	MAF5	SNP	Acetate de 1-phenylethyle_R	27162797	7.8e-10	0.288945	T	480	1	27162797	27162797
3	NA	GLM	MAF5	SNP	Acetate de 1-phenylethyle_R	27006470	1.91e-08	0.250967	T	389	1	27006470	27006470
9	11	GLM	MAF5	SNP	Acetate de 1-phenylethyle_R	2353333	4.79e-08	0.239699	T	95	1	2270242	2453638
9	13	GLM	MAF5	SNP	Acetate de 1-phenylethyle_R	2967803	5.39e-08	0.238237	T	107	2	2967803	2973675
10	26	MLM	MAF5	SNP	Acetate de 1-phenylethyle_R	5308832	7.81e-08	0.239724	T	182	2	5153882	5419006
1	9	GLM	G7	SNP	Acetate de 1-phenylethyle_R	3868129	8.01e-08	0.233329	T	114	6	3648137	4066843
1	9	GLM	MAF5	SNP	Acetate de 1-phenylethyle_R	3868129	8.01e-08	0.233329	T	114	6	3648137	4066843
9	12	GLM	MAF5	SNP	Acetate de 1-phenylethyle_R	2641638	8.1e-08	0.233185	T	102	2	2482674	2713405
6	65	GLM	G7	SNP	Acetate de 1-phenylethyle_R	25201654	9.69e-08	0.230951	T	506	5	25201654	25545192
6	65	GLM	MAF5	SNP	Acetate de 1-phenylethyle_R	25201654	9.69e-08	0.230951	T	506	4	25201654	25545192
1	26	GLM	G7	SNP	Acetate de 1-phenylethyle_R	6855567	1.1e-07	0.229386	T	228	4	6834165	7942921
1	26	GLM	MAF5	SNP	Acetate de 1-phenylethyle_R	6855567	1.1e-07	0.229386	T	228	4	6834165	7942921
9	5	GLM	MAF5	SNP	Acetate de 1-phenylethyle_R	1088620	1.18e-07	0.228433	T	40	2	1088620	1099704
9	6	GLM	MAF5	SNP	Acetate de 1-phenylethyle_R	1151761	1.23e-07	0.227985	T	47	3	1109358	1233013
1	4	GLM	G7	SNP	Acetate de 1-phenylethyle_R	2368915	1.43e-07	0.226076	T	68	11	805132	2445782
1	4	GLM	MAF5	SNP	Acetate de 1-phenylethyle_R	2368915	1.43e-07	0.226076	T	68	12	805132	2445782
10	27	GLM	G7	SNP	Acetate de 1-phenylethyle_R	6158785	1.71e-07	0.223807	T	188	2	6023982	6718126
9	10	GLM	MAF5	SNP	Acetate de 1-phenylethyle_R	1548388	2.05e-07	0.221537	T	67	7	1537448	2208503
1	7	GLM	G7	SNP	Acetate de 1-phenylethyle_R	3398169	2.3e-07	0.220041	T	101	9	3083032	3398183
1	7	GLM	MAF5	SNP	Acetate de 1-phenylethyle_R	3398169	2.3e-07	0.220041	T	101	6	3083032	3398183
9	NA	GLM	NA	SSR	Acetate de 1-phenylethyle_R	1487433	2.86e-07	0.179851	T	SSR	1	1487433	1487433
10	15	GLM	G7	SNP	Acetate de 1-phenylethyle_R	3593240	3.67e-07	0.214116	T	111	1	3483824	3629707
10	15	GLM	MAF5	SNP	Acetate de 1-phenylethyle_R	3593240	3.67e-07	0.214116	T	111	1	3483824	3629707
10	26	MLM	G7	SNP	Acetate de 1-phenylethyle_R	5308832	4.19e-07	0.217441	T	182	1	5153882	5419006
5	31	GLM	MAF5	SNP	Acetate de 1-phenylethyle_R	6262780	4.28e-07	0.212158	T	241	2	6262780	6277938
4	39	GLM	G7	SNP	Acetate de 1-phenylethyle_R	23199282	4.67e-07	0.185863	T	348	2	22671107	23365683
4	39	GLM	MAF5	SNP	Acetate de 1-phenylethyle_R	23199282	4.67e-07	0.185863	T	348	1	22671107	23365683
1	10	GLM	G7	SNP	Acetate de 1-phenylethyle_R	4131970	4.79e-07	0.210712	T	124	2	4114978	4134570
1	10	GLM	MAF5	SNP	Acetate de 1-phenylethyle_R	4131970	4.79e-07	0.210712	T	124	2	4114978	4134570
9	14	MLM	MAF5	SNP	Acetate de 1-phenylethyle_R	3653985	5.36e-07	0.214778	T	132	1	3143509	3836079
5	NA	GLM	MAF5	SNP	Acetate de 1-phenylethyle_R	7385378	5.58e-07	0.208738	T	252	1	7385378	7385378
10	39	GLM	G7	SNP	Acetate de 1-phenylethyle_R	15924015	5.59e-07	0.208728	T	281	1	15924015	16066743
10	39	GLM	MAF5	SNP	Acetate de 1-phenylethyle_R	15924015	5.59e-07	0.208728	T	281	1	15924015	16066743
5	33	GLM	MAF5	SNP	Acetate de 1-phenylethyle_R	8095710	5.6e-07	0.208694	T	257	8	7385446	9269878
1	12	GLM	G7	SNP	Acetate de 1-phenylethyle_R	4171636	5.83e-07	0.208184	T	131	2	4171635	4226176
1	12	GLM	MAF5	SNP	Acetate de 1-phenylethyle_R	4171636	5.83e-07	0.208184	T	131	2	4171635	4226176
1	13	GLM	G7	SNP	Acetate de 1-phenylethyle_R	4303919	6.51e-07	0.206745	T	138	2	4277169	4495991
1	13	GLM	MAF5	SNP	Acetate de 1-phenylethyle_R	4303919	6.51e-07	0.206745	T	138	2	4277169	4495991
1	19	GLM	MAF5	SNP	Acetate de 1-phenylethyle_R	5859617	7.37e-07	0.205153	T	184	1	5859617	5864417
1	16	GLM	MAF5	SNP	Acetate de 1-phenylethyle_R	4702937	7.49e-07	0.20495	T	154	3	4668890	4875804
4	51	MLM	MAF5	SNP	Acetate de 1-phenylethyle_R	26876494	7.95e-07	0.209645	T	460	6	26703951	27146370
4	NA	MLM	MAF5	SNP	Acetate de 1-phenylethyle_R	27666259	1e-06	0.206611	T	510	1	27666259	27666259
1	6	GLM	G7	SNP	Acetate de 1-phenylethyle_R	2793273	1.02e-06	0.200919	T	79	3	2678044	2829157
1	6	GLM	MAF5	SNP	Acetate de 1-phenylethyle_R	2793273	1.02e-06	0.200919	T	79	3	2678044	2829157
3	NA	MLM	MAF5	SNP	Acetate de 1-phenylethyle_R	35412158	1.09e-06	0.205516	T	729	1	35412158	35412158
10	19	GLM	MAF5	SNP	Acetate de 1-phenylethyle_R	3974481	1.1e-06	0.199944	T	134	2	3968361	3998459
9	17	GLM	MAF5	SNP	Acetate de 1-phenylethyle_R	4230979	1.11e-06	0.199867	T	163	4	4071956	4749406
9	10	GLM	G7	SNP	Acetate de 1-phenylethyle_R	1613634	1.12e-06	0.199683	T	69	1	1537448	2208503
9	NA	GLM	MAF5	SNP	Acetate de 1-phenylethyle_R	2978539	1.13e-06	0.199664	T	109	1	2978539	2978539
1	NA	GLM	G7	SNP	Acetate de 1-phenylethyle_R	803695	1.17e-06	0.199128	T	29	1	803695	803695
1	NA	GLM	MAF5	SNP	Acetate de 1-phenylethyle_R	803695	1.17e-06	0.199128	T	29	1	803695	803695
4	NA	MLM	MAF5	SNP	Acetate de 1-phenylethyle_R	27162797	1.24e-06	0.20382	T	480	1	27162797	27162797
1	25	GLM	G7	SNP	Acetate de 1-phenylethyle_R	6834137	1.39e-06	0.196868	T	226	1	6827616	6834137
1	25	GLM	MAF5	SNP	Acetate de 1-phenylethyle_R	6834137	1.39e-06	0.196868	T	226	1	6827616	6834137
4	54	MLM	MAF5	SNP	Acetate de 1-phenylethyle_R	27392302	1.42e-06	0.201952	T	497	2	27321177	27486751
3	NA	MLM	MAF5	SNP	Acetate de 1-phenylethyle_R	35446132	1.46e-06	0.20162	T	734	1	35446132	35446132
10	32	GLM	G7	SNP	Acetate de 1-phenylethyle_R	10594479	1.5e-06	0.195929	T	232	2	10016442	10644720
10	32	GLM	MAF5	SNP	Acetate de 1-phenylethyle_R	10594479	1.5e-06	0.195929	T	232	2	10016442	10644720
9	NA	GLM	MAF5	SNP	Acetate de 1-phenylethyle_R	3895977	1.54e-06	0.195609	T	141	1	3895977	3895977
4	60	MLM	MAF5	SNP	Acetate de 1-phenylethyle_R	28285175	1.54e-06	0.200905	T	538	2	28257730	28352788
4	49	MLM	MAF5	SNP	Acetate de 1-phenylethyle_R	26543385	1.55e-06	0.200852	T	449	4	26543310	26589497
4	56	MLM	MAF5	SNP	Acetate de 1-phenylethyle_R	27985370	1.58e-06	0.200567	T	517	1	27838153	28035296
4	NA	MLM	MAF5	SNP	Acetate de 1-phenylethyle_R	27821881	1.6e-06	0.200409	T	512	1	27821881	27821881
1	NA	MLM	MAF5	SNP	Acetate de 1-phenylethyle_R	3019175	1.64e-06	0.200041	T	83	1	3019175	3019175
5	30	MLM	MAF5	SNP	Acetate de 1-phenylethyle_R	6022103	1.71e-06	0.199491	T	237	2	5933079	6122894
10	NA	GLM	G7	SNP	Acetate de 1-phenylethyle_R	10644750	1.73e-06	0.194034	T	234	1	10644750	10644750
10	NA	GLM	MAF5	SNP	Acetate de 1-phenylethyle_R	10644750	1.73e-06	0.194034	T	234	1	10644750	10644750
4	NA	MLM	MAF5	SNP	Acetate de 1-phenylethyle_R	27273500	1.73e-06	0.199372	T	491	1	27273500	27273500
10	40	GLM	G7	SNP	Acetate de 1-phenylethyle_R	16626052	1.75e-06	0.19389	T	294	4	16208413	17314800
10	40	GLM	MAF5	SNP	Acetate de 1-phenylethyle_R	16626052	1.75e-06	0.19389	T	294	4	16208413	17314800
4	59	MLM	MAF5	SNP	Acetate de 1-phenylethyle_R	28203905	1.77e-06	0.19909	T	530	1	28203905	28222124
1	2	GLM	G7	SNP	Acetate de 1-phenylethyle_R	347337	1.97e-06	0.192334	T	13	3	311606	555162
1	2	GLM	MAF5	SNP	Acetate de 1-phenylethyle_R	347337	1.97e-06	0.192334	T	13	2	311606	555162
1	23	GLM	MAF5	SNP	Acetate de 1-phenylethyle_R	6448063	1.97e-06	0.192372	T	210	2	6381788	6674915
2	12	GLM	MAF5	SNP	Acetate de 1-phenylethyle_R	1030788	1.98e-06	0.192278	T	68	3	939126	1030788
1	3	GLM	G7	SNP	Acetate de 1-phenylethyle_R	606037	2.04e-06	0.191875	T	23	4	588709	750219
1	3	GLM	MAF5	SNP	Acetate de 1-phenylethyle_R	606037	2.04e-06	0.191875	T	23	4	588709	750219
4	40	GLM	G7	SNP	Acetate de 1-phenylethyle_R	23520672	2.09e-06	0.166624	T	359	1	23463681	23682721
4	40	GLM	MAF5	SNP	Acetate de 1-phenylethyle_R	23520672	2.09e-06	0.166624	T	359	1	23463681	23682721
1	NA	GLM	NA	SSR	Acetate de 1-phenylethyle_R	4938891	2.13e-06	0.178005	T	SSR	1	4938891	4938891
1	3	GLM	G7	SNP	Acetate de 1-phenylethyle_R	668012	2.19e-06	0.190932	T	24	3	588709	750219
1	NA	GLM	G7	SNP	Acetate de 1-phenylethyle_R	87133	2.35e-06	0.190022	T	2	1	87133	87133
1	NA	GLM	MAF5	SNP	Acetate de 1-phenylethyle_R	87133	2.35e-06	0.190022	T	2	1	87133	87133
4	NA	GLM	G7	SNP	Acetate de 1-phenylethyle_R	21809511	2.52e-06	0.164203	T	309	1	21809511	21809511
4	NA	GLM	MAF5	SNP	Acetate de 1-phenylethyle_R	21809511	2.52e-06	0.164203	T	309	1	21809511	21809511
9	7	GLM	G7	SNP	Acetate de 1-phenylethyle_R	1320599	2.56e-06	0.188921	T	50	1	1320599	1386937
9	7	GLM	MAF5	SNP	Acetate de 1-phenylethyle_R	1320599	2.56e-06	0.188921	T	50	1	1320599	1386937
1	18	GLM	NA	SSR	Acetate de 1-phenylethyle_R	5502436	3e-06	0.178385	T	SSR	1	5356899	5820933
10	27	GLM	MAF5	SNP	Acetate de 1-phenylethyle_R	6616646	3.16e-06	0.186109	T	191	2	6023982	6718126
7	27	GLM	G7	SNP	Acetate de 1-phenylethyle_R	6409856	3.8e-06	0.183678	T	244	1	6128106	6410151
7	27	GLM	MAF5	SNP	Acetate de 1-phenylethyle_R	6409856	3.8e-06	0.183678	T	244	1	6128106	6410151
9	NA	GLM	MAF5	SNP	Acetate de 1-phenylethyle_R	228168	4.12e-06	0.182588	T	10	1	228168	228168
9	NA	GLM	G7	SNP	Acetate de 1-phenylethyle_R	22146355	5.08e-06	0.179814	T	409	1	22146355	22146355
9	NA	GLM	MAF5	SNP	Acetate de 1-phenylethyle_R	22146355	5.08e-06	0.179814	T	409	1	22146355	22146355
6	68	GLM	G7	SNP	Acetate de 1-phenylethyle_R	25876465	5.39e-06	0.179022	T	534	1	25801401	26051844
1	22	GLM	MAF5	SNP	Acetate de 1-phenylethyle_R	6309593	5.39e-06	0.17901	T	206	1	6248007	6310517
6	68	GLM	MAF5	SNP	Acetate de 1-phenylethyle_R	25876465	5.39e-06	0.179022	T	534	1	25801401	26051844
11	NA	GLM	G7	SNP	Acetate de 1-phenylethyle_R	29217	5.59e-06	0.178523	T	NA	1	29217	29217
11	NA	GLM	MAF5	SNP	Acetate de 1-phenylethyle_R	29217	5.59e-06	0.178523	T	NA	1	29217	29217
4	NA	GLM	G7	SNP	Acetate de 1-phenylethyle_R	21800929	5.66e-06	0.153621	T	307	1	21800929	21800929
4	NA	GLM	MAF5	SNP	Acetate de 1-phenylethyle_R	21800929	5.66e-06	0.153621	T	307	1	21800929	21800929
5	NA	GLM	MAF5	SNP	Acetate de 1-phenylethyle_R	22972226	5.66e-06	0.178352	T	344	1	22972226	22972226
9	6	MLM	MAF5	SNP	Acetate de 1-phenylethyle_R	1149253	6.1e-06	0.182482	T	46	2	1109358	1233013
4	40	MLM	MAF5	SNP	Acetate de 1-phenylethyle_R	23520672	6.16e-06	0.156829	T	359	1	23463681	23682721
10	24	GLM	G7	SNP	Acetate de 1-phenylethyle_R	4610049	6.34e-06	0.176853	T	164	1	4462717	4610049
10	24	GLM	MAF5	SNP	Acetate de 1-phenylethyle_R	4610049	6.34e-06	0.176853	T	164	1	4462717	4610049
9	5	MLM	MAF5	SNP	Acetate de 1-phenylethyle_R	1088620	6.37e-06	0.181891	T	40	1	1088620	1099704
1	21	GLM	MAF5	SNP	Acetate de 1-phenylethyle_R	6204028	6.55e-06	0.176405	T	202	6	5940526	6204028
1	18	GLM	MAF5	SNP	Acetate de 1-phenylethyle_R	5551864	6.63e-06	0.17624	T	174	1	5356899	5820933
9	26	GLM	NA	SSR	Acetate de 1-phenylethyle_R	9827809	6.65e-06	0.141726	T	SSR	1	7670506	10934281
1	23	GLM	G7	SNP	Acetate de 1-phenylethyle_R	6614869	6.91e-06	0.1757	T	214	1	6381788	6674915
9	10	GLM	NA	SSR	Acetate de 1-phenylethyle_R	1704971	6.92e-06	0.148323	T	SSR	1	1537448	2208503
10	29	GLM	G7	SNP	Acetate de 1-phenylethyle_R	7584692	7.19e-06	0.175163	T	203	1	7296608	7879432
10	29	GLM	MAF5	SNP	Acetate de 1-phenylethyle_R	7584692	7.19e-06	0.175163	T	203	1	7296608	7879432
10	37	GLM	G7	SNP	Acetate de 1-phenylethyle_R	15403878	7.26e-06	0.175036	T	270	3	14524131	15403878
10	37	GLM	MAF5	SNP	Acetate de 1-phenylethyle_R	15403878	7.26e-06	0.175036	T	270	3	14524131	15403878
6	39	GLM	MAF5	SNP	Acetate de 1-phenylethyle_R	20017744	7.27e-06	0.175018	T	312	1	20017326	20351935
1	17	GLM	MAF5	SNP	Acetate de 1-phenylethyle_R	4991010	7.34e-06	0.17489	T	163	1	4973179	5305096
6	37	GLM	MAF5	SNP	Acetate de 1-phenylethyle_R	19846063	7.51e-06	0.174574	T	306	2	19846063	19846173
1	NA	GLM	MAF5	SNP	Acetate de 1-phenylethyle_R	5323693	7.71e-06	0.174219	T	168	1	5323693	5323693
1	NA	GLM	G7	SNP	Acetate de 1-phenylethyle_R	4158845	7.83e-06	0.17401	T	128	1	4158845	4158845
1	NA	GLM	MAF5	SNP	Acetate de 1-phenylethyle_R	4158845	7.83e-06	0.17401	T	128	1	4158845	4158845
9	26	GLM	G7	SNP	Acetate de 1-phenylethyle_R	9937534	8.46e-06	0.172981	T	335	1	7670506	10934281
9	26	GLM	MAF5	SNP	Acetate de 1-phenylethyle_R	9937534	8.46e-06	0.172981	T	335	1	7670506	10934281
1	21	GLM	G7	SNP	Acetate de 1-phenylethyle_R	6130253	9.41e-06	0.171544	T	199	2	5940526	6204028
6	67	GLM	G7	SNP	Acetate de 1-phenylethyle_R	25664581	9.41e-06	0.171537	T	525	1	25640726	25664581
6	67	GLM	MAF5	SNP	Acetate de 1-phenylethyle_R	25664581	9.41e-06	0.171537	T	525	1	25640726	25664581
1	5	GLM	G7	SNP	Acetate de 1-phenylethyle_R	2496458	1.04e-05	0.170167	T	75	1	2484281	2532862
1	5	GLM	MAF5	SNP	Acetate de 1-phenylethyle_R	2496458	1.04e-05	0.170167	T	75	1	2484281	2532862
10	36	GLM	G7	SNP	Acetate de 1-phenylethyle_R	14239120	1.05e-05	0.170123	T	260	2	13349399	14327326
10	36	GLM	MAF5	SNP	Acetate de 1-phenylethyle_R	14239120	1.05e-05	0.170123	T	260	2	13349399	14327326
4	NA	GLM	G7	SNP	Acetate de 1-phenylethyle_R	21992161	1.08e-05	0.145056	T	NA	1	21992161	21992161
4	38	GLM	G7	SNP	Acetate de 1-phenylethyle_R	22503297	1.08e-05	0.145056	T	NA	1	22435678	22617119
4	NA	GLM	G7	SNP	Acetate de 1-phenylethyle_R	23382762	1.08e-05	0.145056	T	NA	1	23382762	23382762
2	NA	GLM	MAF5	SNP	Acetate de 1-phenylethyle_R	107762	1.11e-05	0.169333	T	8	1	107762	107762
2	9	GLM	MAF5	SNP	Acetate de 1-phenylethyle_R	748585	1.11e-05	0.16926	T	44	2	748585	777460
9	9	GLM	G7	SNP	Acetate de 1-phenylethyle_R	1425875	1.12e-05	0.169171	T	61	2	1425875	1429387
9	9	GLM	MAF5	SNP	Acetate de 1-phenylethyle_R	1425875	1.12e-05	0.169171	T	61	2	1425875	1429387
2	NA	GLM	MAF5	SNP	Acetate de 1-phenylethyle_R	875109	1.13e-05	0.169108	T	56	1	875109	875109
5	39	GLM	MAF5	SNP	Acetate de 1-phenylethyle_R	21607536	1.17e-05	0.168607	T	335	2	20887048	22479719
1	NA	GLM	G7	SNP	Acetate de 1-phenylethyle_R	4667668	1.19e-05	0.16838	T	152	1	4667668	4667668
1	NA	GLM	MAF5	SNP	Acetate de 1-phenylethyle_R	4667668	1.19e-05	0.16838	T	152	1	4667668	4667668
9	6	GLM	G7	SNP	Acetate de 1-phenylethyle_R	1109358	1.2e-05	0.168219	T	44	1	1109358	1233013
10	38	GLM	G7	SNP	Acetate de 1-phenylethyle_R	15608051	1.21e-05	0.168139	T	273	1	15418463	15921896
10	38	GLM	MAF5	SNP	Acetate de 1-phenylethyle_R	15608051	1.21e-05	0.168139	T	273	1	15418463	15921896
5	38	GLM	MAF5	SNP	Acetate de 1-phenylethyle_R	19787620	1.22e-05	0.168015	T	324	1	18773500	19787620
9	NA	GLM	MAF5	SNP	Acetate de 1-phenylethyle_R	30406	1.28e-05	0.167432	T	1	1	30406	30406
1	NA	GLM	G7	SNP	Acetate de 1-phenylethyle_R	63348	1.64e-05	0.164054	T	1	1	63348	63348
4	40	MLM	G7	SNP	Acetate de 1-phenylethyle_R	23520672	1.66e-05	0.142997	T	359	1	23463681	23682721
10	25	GLM	G7	SNP	Acetate de 1-phenylethyle_R	5047733	1.92e-05	0.161915	T	171	1	5047729	5053844
1	26	GLM	NA	SSR	Acetate de 1-phenylethyle_R	7541990	2.3e-05	0.131078	T	SSR	1	6834165	7942921
1	NA	GLM	NA	SSR	Acetate de 1-phenylethyle_R	4634077	6.22e-05	0.118196	T	SSR	1	4634077	4634077
10	27	GLM	NA	SSR	Acetate de 1-phenylethyle_R	6167221	6.46e-05	0.164616	T	SSR	2	6023982	6718126
3	NA	GLM	NA	SSR	Acetate de 1-phenylethyle_R	20494339	0.000244	0.13904	T	SSR	1	20494339	20494339
7	31	GLM	MAF5	SNP	Benzaldehyde_UR	10459413	1.32e-05	0.167017	NT	304	1	10032134	11286123
2	80	GLM	NA	SSR	Benzaldehyde_UR	40815971	9.81e-05	0.193064	NT	SSR	1	40792918	40855128
6	65	GLM	G7	SNP	Benzaldehyde_R	25213164	8.53e-09	0.260742	T	507	5	25201654	25545192
6	65	GLM	MAF5	SNP	Benzaldehyde_R	25213164	8.53e-09	0.260742	T	507	5	25201654	25545192
6	33	GLM	G7	SNP	Benzaldehyde_R	17058153	1.03e-08	0.258472	T	243	6	16858027	17659192
6	33	GLM	MAF5	SNP	Benzaldehyde_R	17058153	1.03e-08	0.258472	T	243	5	16858027	17659192
6	NA	GLM	G7	SNP	Benzaldehyde_R	23566379	1.99e-08	0.250484	T	467	1	23566379	23566379
6	NA	GLM	MAF5	SNP	Benzaldehyde_R	23566379	1.99e-08	0.250484	T	467	1	23566379	23566379
6	60	GLM	NA	SSR	Benzaldehyde_R	23489326	2.33e-08	0.275814	T	SSR	1	23432637	23531966
1	9	GLM	G7	SNP	Benzaldehyde_R	4022340	4.14e-08	0.241511	T	117	6	3648137	4066843
1	9	GLM	MAF5	SNP	Benzaldehyde_R	4022340	4.14e-08	0.241511	T	117	6	3648137	4066843
6	64	GLM	G7	SNP	Benzaldehyde_R	23951451	4.97e-08	0.239243	T	481	19	23913803	25147021
6	64	GLM	MAF5	SNP	Benzaldehyde_R	23951451	4.97e-08	0.239243	T	481	18	23913803	25147021
2	NA	GLM	NA	SSR	Benzaldehyde_R	11231613	8.31e-08	0.301446	T	SSR	1	11231613	11231613
6	63	GLM	G7	SNP	Benzaldehyde_R	23864782	1.13e-07	0.229017	T	477	2	23848056	23864782
6	63	GLM	MAF5	SNP	Benzaldehyde_R	23864782	1.13e-07	0.229017	T	477	2	23848056	23864782
2	35	GLM	G7	SNP	Benzaldehyde_R	6902555	1.15e-07	0.228765	T	299	5	6579096	7156137
2	35	GLM	MAF5	SNP	Benzaldehyde_R	6902555	1.15e-07	0.228765	T	299	5	6579096	7156137
6	60	GLM	G7	SNP	Benzaldehyde_R	23466264	1.2e-07	0.228305	T	459	2	23432637	23531966
6	60	GLM	MAF5	SNP	Benzaldehyde_R	23466264	1.2e-07	0.228305	T	459	2	23432637	23531966
2	36	GLM	NA	SSR	Benzaldehyde_R	7453377	1.54e-07	0.206196	T	SSR	1	7324500	7617242
3	44	GLM	G7	SNP	Benzaldehyde_R	27641474	1.56e-07	0.224943	T	423	10	27183974	27696466
3	44	GLM	MAF5	SNP	Benzaldehyde_R	27641474	1.56e-07	0.224943	T	423	10	27183974	27696466
6	54	GLM	G7	SNP	Benzaldehyde_R	22496338	1.78e-07	0.223338	T	420	3	22393667	22625006
6	54	GLM	MAF5	SNP	Benzaldehyde_R	22496338	1.78e-07	0.223338	T	420	2	22393667	22625006
2	36	GLM	G7	SNP	Benzaldehyde_R	7448797	1.91e-07	0.222396	T	314	4	7324500	7617242
2	36	GLM	MAF5	SNP	Benzaldehyde_R	7448797	1.91e-07	0.222396	T	314	4	7324500	7617242
3	NA	GLM	G7	SNP	Benzaldehyde_R	5429482	2.46e-07	0.219187	T	126	1	5429482	5429482
3	NA	GLM	MAF5	SNP	Benzaldehyde_R	5429482	2.46e-07	0.219187	T	126	1	5429482	5429482
4	NA	GLM	G7	SNP	Benzaldehyde_R	27277631	2.61e-07	0.218439	T	492	1	27277631	27277631
4	NA	GLM	MAF5	SNP	Benzaldehyde_R	27277631	2.61e-07	0.218439	T	492	1	27277631	27277631
3	48	GLM	G7	SNP	Benzaldehyde_R	28040928	2.85e-07	0.217354	T	443	2	27982157	28410173
3	48	GLM	MAF5	SNP	Benzaldehyde_R	28040928	2.85e-07	0.217354	T	443	2	27982157	28410173
3	43	GLM	G7	SNP	Benzaldehyde_R	27103677	2.86e-07	0.217276	T	396	2	27074547	27103677
3	43	GLM	MAF5	SNP	Benzaldehyde_R	27103677	2.86e-07	0.217276	T	396	2	27074547	27103677
1	7	GLM	G7	SNP	Benzaldehyde_R	3194927	3.87e-07	0.213421	T	87	8	3083032	3398183
1	7	GLM	MAF5	SNP	Benzaldehyde_R	3194927	3.87e-07	0.213421	T	87	9	3083032	3398183
1	25	GLM	G7	SNP	Benzaldehyde_R	6834137	4.06e-07	0.212809	T	226	1	6827616	6834137
1	25	GLM	MAF5	SNP	Benzaldehyde_R	6834137	4.06e-07	0.212809	T	226	1	6827616	6834137
1	23	GLM	MAF5	SNP	Benzaldehyde_R	6448063	4.28e-07	0.21216	T	210	2	6381788	6674915
7	NA	GLM	MAF5	SNP	Benzaldehyde_R	2218633	4.58e-07	0.18611	T	105	1	2218633	2218633
3	49	GLM	G7	SNP	Benzaldehyde_R	28498827	4.65e-07	0.211069	T	453	3	28465056	29372073
3	49	GLM	MAF5	SNP	Benzaldehyde_R	28498827	4.65e-07	0.211069	T	453	2	28465056	29372073
1	26	GLM	G7	SNP	Benzaldehyde_R	7081063	5.1e-07	0.209885	T	230	2	6834165	7942921
1	26	GLM	MAF5	SNP	Benzaldehyde_R	7081063	5.1e-07	0.209885	T	230	2	6834165	7942921
1	23	GLM	G7	SNP	Benzaldehyde_R	6614869	6.11e-07	0.207579	T	214	1	6381788	6674915
10	2	GLM	NA	SSR	Benzaldehyde_R	323778	6.53e-07	0.219183	T	SSR	1	290733	456792
6	NA	GLM	G7	SNP	Benzaldehyde_R	23535728	6.54e-07	0.206703	T	463	1	23535728	23535728
6	NA	GLM	MAF5	SNP	Benzaldehyde_R	23535728	6.54e-07	0.206703	T	463	1	23535728	23535728
3	NA	GLM	G7	SNP	Benzaldehyde_R	27106193	6.76e-07	0.206262	T	397	1	27106193	27106193
3	NA	GLM	MAF5	SNP	Benzaldehyde_R	27106193	6.76e-07	0.206262	T	397	1	27106193	27106193
10	12	GLM	MAF5	SNP	Benzaldehyde_R	2835349	8.35e-07	0.203539	T	83	1	2623845	2925508
10	NA	GLM	MAF5	SNP	Benzaldehyde_R	3120295	8.69e-07	0.203026	T	93	1	3120295	3120295
1	4	GLM	G7	SNP	Benzaldehyde_R	2430002	1.12e-06	0.199689	T	70	4	805132	2445782
1	4	GLM	MAF5	SNP	Benzaldehyde_R	2430002	1.12e-06	0.199689	T	70	3	805132	2445782
8	18	GLM	G7	SNP	Benzaldehyde_R	5004248	1.14e-06	0.19952	T	238	2	4602142	5044657
8	18	GLM	MAF5	SNP	Benzaldehyde_R	5004248	1.14e-06	0.19952	T	238	2	4602142	5044657
6	58	GLM	G7	SNP	Benzaldehyde_R	23097785	1.17e-06	0.199154	T	445	1	23097785	23108368
6	58	GLM	MAF5	SNP	Benzaldehyde_R	23097785	1.17e-06	0.199154	T	445	1	23097785	23108368
2	NA	GLM	G7	SNP	Benzaldehyde_R	7220848	1.19e-06	0.198886	T	306	1	7220848	7220848
2	NA	GLM	MAF5	SNP	Benzaldehyde_R	7220848	1.19e-06	0.198886	T	306	1	7220848	7220848
2	34	GLM	NA	SSR	Benzaldehyde_R	6500653	1.19e-06	0.181314	T	SSR	1	6444089	6563390
1	9	MLM	G7	SNP	Benzaldehyde_R	4022340	1.21e-06	0.19037	T	117	3	3648137	4066843
3	NA	GLM	G7	SNP	Benzaldehyde_R	27916847	1.3e-06	0.197746	T	438	1	27916847	27916847
3	NA	GLM	MAF5	SNP	Benzaldehyde_R	27916847	1.3e-06	0.197746	T	438	1	27916847	27916847
1	9	MLM	MAF5	SNP	Benzaldehyde_R	4022340	1.82e-06	0.186652	T	117	2	3648137	4066843
4	40	MLM	G7	SNP	Benzaldehyde_R	23646438	1.83e-06	0.162906	T	NA	2	23463681	23682721
6	38	GLM	G7	SNP	Benzaldehyde_R	19920343	1.84e-06	0.193243	T	309	2	19915910	19920343
6	38	GLM	MAF5	SNP	Benzaldehyde_R	19920343	1.84e-06	0.193243	T	309	2	19915910	19920343
5	56	GLM	G7	SNP	Benzaldehyde_R	30471918	2.1e-06	0.191502	T	516	1	30407214	30473075
5	56	GLM	MAF5	SNP	Benzaldehyde_R	30471918	2.1e-06	0.191502	T	516	1	30407214	30473075
2	34	GLM	G7	SNP	Benzaldehyde_R	6493019	2.17e-06	0.191062	T	278	3	6444089	6563390
2	34	GLM	MAF5	SNP	Benzaldehyde_R	6493019	2.17e-06	0.191062	T	278	3	6444089	6563390
10	13	GLM	G7	SNP	Benzaldehyde_R	3061726	2.27e-06	0.190503	T	91	1	3052599	3061726
10	13	GLM	MAF5	SNP	Benzaldehyde_R	3061726	2.27e-06	0.190503	T	91	1	3052599	3061726
5	48	GLM	G7	SNP	Benzaldehyde_R	28407064	2.32e-06	0.190195	T	440	1	28210423	28435165
5	48	GLM	MAF5	SNP	Benzaldehyde_R	28407064	2.32e-06	0.190195	T	440	1	28210423	28435165
6	NA	GLM	G7	SNP	Benzaldehyde_R	23609639	2.53e-06	0.189074	T	469	1	23609639	23609639
6	NA	GLM	MAF5	SNP	Benzaldehyde_R	23609639	2.53e-06	0.189074	T	469	1	23609639	23609639
1	4	MLM	G7	SNP	Benzaldehyde_R	2430002	2.56e-06	0.170828	T	70	2	805132	2445782
8	38	GLM	G7	SNP	Benzaldehyde_R	15847204	2.92e-06	0.18718	T	422	3	15847204	15850461
8	38	GLM	MAF5	SNP	Benzaldehyde_R	15847204	2.92e-06	0.18718	T	422	3	15847204	15850461
1	4	MLM	MAF5	SNP	Benzaldehyde_R	2430002	3.02e-06	0.170046	T	70	1	805132	2445782
9	NA	GLM	G7	SNP	Benzaldehyde_R	664982	3.11e-06	0.186327	T	28	1	664982	664982
9	NA	GLM	MAF5	SNP	Benzaldehyde_R	664982	3.11e-06	0.186327	T	28	1	664982	664982
9	33	GLM	MAF5	SNP	Benzaldehyde_R	23302911	3.21e-06	0.185906	T	419	1	23101222	23892356
9	4	GLM	G7	SNP	Benzaldehyde_R	713588	3.43e-06	0.185043	T	29	3	713588	857818
9	4	GLM	MAF5	SNP	Benzaldehyde_R	713588	3.43e-06	0.185043	T	29	3	713588	857818
5	81	GLM	G7	SNP	Benzaldehyde_R	37304100	3.49e-06	0.184811	T	751	1	37076966	37549697
5	81	GLM	MAF5	SNP	Benzaldehyde_R	37304100	3.49e-06	0.184811	T	751	1	37076966	37549697
8	31	GLM	MAF5	SNP	Benzaldehyde_R	7953415	3.65e-06	0.184221	T	348	1	7950363	8173848
6	50	GLM	G7	SNP	Benzaldehyde_R	22186307	3.75e-06	0.18384	T	396	1	22110904	22196261
6	50	GLM	MAF5	SNP	Benzaldehyde_R	22186307	3.75e-06	0.18384	T	396	1	22110904	22196261
6	49	GLM	G7	SNP	Benzaldehyde_R	21955686	4.07e-06	0.182761	T	379	4	21698381	22089947
9	NA	GLM	G7	SNP	Benzaldehyde_R	649739	4.07e-06	0.182767	T	26	1	649739	649739
6	49	GLM	MAF5	SNP	Benzaldehyde_R	21955686	4.07e-06	0.182761	T	379	3	21698381	22089947
9	NA	GLM	MAF5	SNP	Benzaldehyde_R	649739	4.07e-06	0.182767	T	26	1	649739	649739
6	NA	GLM	G7	SNP	Benzaldehyde_R	23150153	4.3e-06	0.182029	T	447	1	23150153	23150153
6	NA	GLM	MAF5	SNP	Benzaldehyde_R	23150153	4.3e-06	0.182029	T	447	1	23150153	23150153
2	NA	GLM	G7	SNP	Benzaldehyde_R	9951633	4.5e-06	0.18143	T	388	1	9951633	9951633
2	NA	GLM	MAF5	SNP	Benzaldehyde_R	9951633	4.5e-06	0.18143	T	388	1	9951633	9951633
3	51	GLM	G7	SNP	Benzaldehyde_R	29658860	4.77e-06	0.180646	T	493	1	29479613	29720600
3	51	GLM	MAF5	SNP	Benzaldehyde_R	29658860	4.77e-06	0.180646	T	493	1	29479613	29720600
3	53	GLM	G7	SNP	Benzaldehyde_R	29969774	4.95e-06	0.18014	T	512	2	29967412	29974947
3	53	GLM	MAF5	SNP	Benzaldehyde_R	29969774	4.95e-06	0.18014	T	512	2	29967412	29974947
1	7	MLM	G7	SNP	Benzaldehyde_R	3363552	5.24e-06	0.173162	T	99	2	3083032	3398183
8	NA	GLM	G7	SNP	Benzaldehyde_R	9140216	5.71e-06	0.178254	T	365	1	9140216	9140216
8	NA	GLM	MAF5	SNP	Benzaldehyde_R	9140216	5.71e-06	0.178254	T	365	1	9140216	9140216
2	47	GLM	G7	SNP	Benzaldehyde_R	13159953	5.73e-06	0.17821	T	440	2	11993049	13159953
2	47	GLM	MAF5	SNP	Benzaldehyde_R	13159953	5.73e-06	0.17821	T	440	2	11993049	13159953
6	NA	GLM	G7	SNP	Benzaldehyde_R	16631404	6e-06	0.177591	T	234	1	16631404	16631404
6	NA	GLM	MAF5	SNP	Benzaldehyde_R	16631404	6e-06	0.177591	T	234	1	16631404	16631404
1	7	MLM	MAF5	SNP	Benzaldehyde_R	3363552	6.72e-06	0.170611	T	99	2	3083032	3398183
3	52	GLM	G7	SNP	Benzaldehyde_R	29933555	6.89e-06	0.175725	T	507	3	29722150	29962468
3	52	GLM	MAF5	SNP	Benzaldehyde_R	29933555	6.89e-06	0.175725	T	507	3	29722150	29962468
1	6	GLM	G7	SNP	Benzaldehyde_R	2793273	7.03e-06	0.175468	T	79	2	2678044	2829157
1	6	GLM	MAF5	SNP	Benzaldehyde_R	2793273	7.03e-06	0.175468	T	79	2	2678044	2829157
9	4	GLM	MAF5	SNP	Benzaldehyde_R	749395	7.08e-06	0.17536	T	31	3	713588	857818
8	1	GLM	G7	SNP	Benzaldehyde_R	701254	7.17e-06	0.175199	T	26	1	63487	904210
8	1	GLM	MAF5	SNP	Benzaldehyde_R	701254	7.17e-06	0.175199	T	26	1	63487	904210
3	45	GLM	G7	SNP	Benzaldehyde_R	27742624	7.79e-06	0.174092	T	427	1	27724104	27742624
3	45	GLM	MAF5	SNP	Benzaldehyde_R	27742624	7.79e-06	0.174092	T	427	1	27724104	27742624
8	1	GLM	NA	SSR	Benzaldehyde_R	685598	7.83e-06	0.197764	T	SSR	1	63487	904210
5	NA	GLM	MAF5	SNP	Benzaldehyde_R	9289006	9.98e-06	0.170749	T	265	1	9289006	9289006
2	31	GLM	NA	SSR	Benzaldehyde_R	4817072	1e-05	0.172842	T	SSR	1	4808252	4821878
6	NA	GLM	G7	SNP	Benzaldehyde_R	22981305	1.03e-05	0.170389	T	442	1	22981305	22981305
6	NA	GLM	MAF5	SNP	Benzaldehyde_R	22981305	1.03e-05	0.170389	T	442	1	22981305	22981305
8	37	GLM	G7	SNP	Benzaldehyde_R	14498544	1.07e-05	0.169779	T	403	3	14444953	15439624
8	37	GLM	MAF5	SNP	Benzaldehyde_R	14498544	1.07e-05	0.169779	T	403	3	14444953	15439624
1	5	GLM	G7	SNP	Benzaldehyde_R	2496458	1.09e-05	0.169607	T	75	1	2484281	2532862
1	5	GLM	MAF5	SNP	Benzaldehyde_R	2496458	1.09e-05	0.169607	T	75	1	2484281	2532862
1	77	GLM	MAF5	SNP	Benzaldehyde_R	33198790	1.09e-05	0.169603	T	705	1	33188272	33406723
5	58	GLM	G7	SNP	Benzaldehyde_R	30583664	1.1e-05	0.144846	T	525	1	30582392	30583664
5	58	GLM	MAF5	SNP	Benzaldehyde_R	30583664	1.1e-05	0.144846	T	525	1	30582392	30583664
8	39	GLM	G7	SNP	Benzaldehyde_R	16439377	1.13e-05	0.16913	T	427	1	16439377	16777962
8	39	GLM	MAF5	SNP	Benzaldehyde_R	16439377	1.13e-05	0.16913	T	427	1	16439377	16777962
5	49	GLM	MAF5	SNP	Benzaldehyde_R	28619215	1.17e-05	0.168636	T	446	1	28530169	29395287
6	47	GLM	G7	SNP	Benzaldehyde_R	21525718	1.22e-05	0.168002	T	366	2	21458845	21577257
6	47	GLM	MAF5	SNP	Benzaldehyde_R	21525718	1.22e-05	0.168002	T	366	1	21458845	21577257
5	NA	GLM	MAF5	SNP	Benzaldehyde_R	27078607	1.24e-05	0.167835	T	399	1	27078607	27078607
2	43	GLM	G7	SNP	Benzaldehyde_R	9873253	1.31e-05	0.167069	T	387	1	9873165	9873253
3	38	GLM	G7	SNP	Benzaldehyde_R	26425458	1.31e-05	0.167078	T	356	1	26417575	26425518
5	NA	GLM	G7	SNP	Benzaldehyde_R	4128409	1.31e-05	0.142564	T	200	1	4128409	4128409
10	26	GLM	G7	SNP	Benzaldehyde_R	5308832	1.31e-05	0.167094	T	182	1	5153882	5419006
2	43	GLM	MAF5	SNP	Benzaldehyde_R	9873253	1.31e-05	0.167069	T	387	1	9873165	9873253
3	38	GLM	MAF5	SNP	Benzaldehyde_R	26425458	1.31e-05	0.167078	T	356	1	26417575	26425518
5	NA	GLM	MAF5	SNP	Benzaldehyde_R	4128409	1.31e-05	0.142564	T	200	1	4128409	4128409
10	26	GLM	MAF5	SNP	Benzaldehyde_R	5308832	1.31e-05	0.167094	T	182	1	5153882	5419006
3	NA	GLM	G7	SNP	Benzaldehyde_R	27939813	1.35e-05	0.166636	T	441	1	27939813	27939813
3	NA	GLM	MAF5	SNP	Benzaldehyde_R	27939813	1.35e-05	0.166636	T	441	1	27939813	27939813
5	50	GLM	MAF5	SNP	Benzaldehyde_R	29495768	1.35e-05	0.166697	T	468	1	29446863	29508340
2	NA	GLM	G7	SNP	Benzaldehyde_R	11422665	1.4e-05	0.166207	T	417	1	11422665	11422665
2	NA	GLM	MAF5	SNP	Benzaldehyde_R	11422665	1.4e-05	0.166207	T	417	1	11422665	11422665
11	NA	GLM	G7	SNP	Benzaldehyde_R	5222	1.52e-05	0.140603	T	NA	1	5222	5222
11	NA	GLM	MAF5	SNP	Benzaldehyde_R	5222	1.52e-05	0.140603	T	NA	1	5222	5222
3	NA	GLM	G7	SNP	Benzaldehyde_R	6972129	1.62e-05	0.164164	T	139	1	6972129	6972129
3	15	GLM	NA	SSR	Benzaldehyde_R	3759681	1.62e-05	0.138517	T	SSR	1	3316100	3993642
3	41	GLM	G7	SNP	Benzaldehyde_R	26706759	1.64e-05	0.16406	T	374	1	26698899	26988789
3	NA	GLM	G7	SNP	Benzaldehyde_R	26341999	1.74e-05	0.163241	T	347	1	26341999	26341999
10	53	GLM	G7	SNP	Benzaldehyde_R	20965987	1.77e-05	0.162966	T	386	1	20868667	20968241
6	50	GLM	NA	SSR	Benzaldehyde_R	22113125	2.28e-05	0.123607	T	SSR	1	22110904	22196261
1	77	GLM	NA	SSR	Benzaldehyde_R	33279822	2.82e-05	0.144762	T	SSR	1	33188272	33406723
2	13	GLM	NA	SSR	Benzaldehyde_R	1067092	3.13e-05	0.178959	T	SSR	1	1065901	1181828
10	27	GLM	NA	SSR	Benzaldehyde_R	6167221	6.62e-05	0.164305	T	SSR	1	6023982	6718126
4	71	GLM	NA	SSR	Benzaldehyde_R	30699892	0.000108	0.131581	T	SSR	1	30406710	30965982
9	NA	GLM	NA	SSR	Benzaldehyde_R	38441253	0.000117	0.122177	T	SSR	1	38441253	38441253
10	NA	GLM	NA	SSR	Benzaldehyde_R	20881693	0.000126	0.194979	T	SSR	1	20881693	20881693
1	NA	GLM	NA	SSR	Benzaldehyde_R	4938891	0.000235	0.121999	T	SSR	1	4938891	4938891
1	18	GLM	NA	SSR	Benzaldehyde_R	5502436	0.000245	0.127597	T	SSR	1	5356899	5820933
8	39	GLM	NA	SSR	Benzaldehyde_R	16495267	0.000251	0.11606	T	SSR	1	16439377	16777962
2	36	GLM	G7	SNP	Benzylic alcohol_UR	7448797	2.12e-08	0.249691	NT	314	4	7324500	7617242
2	36	GLM	MAF5	SNP	Benzylic alcohol_UR	7448797	2.12e-08	0.249691	NT	314	4	7324500	7617242
2	36	GLM	NA	SSR	Benzylic alcohol_UR	7453377	1.65e-07	0.205427	NT	SSR	1	7324500	7617242
2	35	GLM	G7	SNP	Benzylic alcohol_UR	6902555	1.97e-07	0.222024	NT	299	5	6579096	7156137
2	35	GLM	MAF5	SNP	Benzylic alcohol_UR	6902555	1.97e-07	0.222024	NT	299	5	6579096	7156137
2	NA	GLM	G7	SNP	Benzylic alcohol_UR	7220848	2.23e-07	0.220463	NT	306	1	7220848	7220848
2	NA	GLM	MAF5	SNP	Benzylic alcohol_UR	7220848	2.23e-07	0.220463	NT	306	2	7220848	7220848
8	18	GLM	G7	SNP	Benzylic alcohol_UR	5004248	3.74e-07	0.213867	NT	238	3	4602142	5044657
8	18	GLM	MAF5	SNP	Benzylic alcohol_UR	5004248	3.74e-07	0.213867	NT	238	3	4602142	5044657
6	50	GLM	G7	SNP	Benzylic alcohol_UR	22186307	4.51e-07	0.211475	NT	396	1	22110904	22196261
6	50	GLM	MAF5	SNP	Benzylic alcohol_UR	22186307	4.51e-07	0.211475	NT	396	1	22110904	22196261
2	NA	GLM	NA	SSR	Benzylic alcohol_UR	11231613	6.53e-07	0.276626	NT	SSR	1	11231613	11231613
2	47	GLM	G7	SNP	Benzylic alcohol_UR	12833757	7.65e-07	0.204666	NT	438	3	11993049	13159953
2	47	GLM	MAF5	SNP	Benzylic alcohol_UR	12833757	7.65e-07	0.204666	NT	438	3	11993049	13159953
9	NA	GLM	MAF5	SNP	Benzylic alcohol_UR	908021	7.91e-07	0.20424	NT	37	1	908021	908021
9	20	GLM	G7	SNP	Benzylic alcohol_UR	6117022	1.02e-06	0.200899	NT	254	4	5327028	6165415
9	20	GLM	MAF5	SNP	Benzylic alcohol_UR	6117022	1.02e-06	0.200899	NT	254	4	5327028	6165415
3	NA	GLM	G7	SNP	Benzylic alcohol_UR	6972129	1.2e-06	0.198803	NT	139	1	6972129	6972129
3	NA	GLM	MAF5	SNP	Benzylic alcohol_UR	6972129	1.2e-06	0.198803	NT	139	1	6972129	6972129
1	77	GLM	NA	SSR	Benzylic alcohol_UR	33279822	1.49e-06	0.181493	NT	SSR	1	33188272	33406723
3	73	GLM	MAF5	SNP	Benzylic alcohol_UR	35859435	1.58e-06	0.19526	NT	758	2	35855119	35878999
3	60	GLM	MAF5	SNP	Benzylic alcohol_UR	31981983	2.06e-06	0.191755	NT	602	1	31981912	31981983
2	NA	GLM	G7	SNP	Benzylic alcohol_UR	906377	3.12e-06	0.186286	NT	60	1	906377	906377
2	NA	GLM	MAF5	SNP	Benzylic alcohol_UR	906377	3.12e-06	0.186286	NT	60	1	906377	906377
2	34	GLM	NA	SSR	Benzylic alcohol_UR	6500653	3.14e-06	0.170419	NT	SSR	1	6444089	6563390
2	37	GLM	G7	SNP	Benzylic alcohol_UR	7899353	3.19e-06	0.185978	NT	333	2	7812200	8143718
2	37	GLM	MAF5	SNP	Benzylic alcohol_UR	7899353	3.19e-06	0.185978	NT	333	2	7812200	8143718
10	12	GLM	G7	SNP	Benzylic alcohol_UR	2909578	3.26e-06	0.160853	NT	84	1	2623845	2925508
10	12	GLM	MAF5	SNP	Benzylic alcohol_UR	2909578	3.26e-06	0.160853	NT	84	1	2623845	2925508
2	NA	GLM	G7	SNP	Benzylic alcohol_UR	7659340	3.4e-06	0.185124	NT	325	1	7659340	7659340
2	NA	GLM	MAF5	SNP	Benzylic alcohol_UR	7659340	3.4e-06	0.185124	NT	325	1	7659340	7659340
8	39	GLM	G7	SNP	Benzylic alcohol_UR	16644953	4.74e-06	0.180733	NT	429	2	16439377	16777962
8	39	GLM	MAF5	SNP	Benzylic alcohol_UR	16644953	4.74e-06	0.180733	NT	429	1	16439377	16777962
1	71	GLM	G7	SNP	Benzylic alcohol_UR	31371224	5.01e-06	0.179993	NT	634	5	31194973	32152403
1	71	GLM	MAF5	SNP	Benzylic alcohol_UR	31371224	5.01e-06	0.179993	NT	634	3	31194973	32152403
3	62	GLM	NA	SSR	Benzylic alcohol_UR	32501489	5.85e-06	0.168392	NT	SSR	1	32075624	33514225
10	13	GLM	G7	SNP	Benzylic alcohol_UR	3052599	5.97e-06	0.177644	NT	90	1	3052599	3061726
10	13	GLM	MAF5	SNP	Benzylic alcohol_UR	3052599	5.97e-06	0.177644	NT	90	1	3052599	3061726
3	72	GLM	MAF5	SNP	Benzylic alcohol_UR	35843732	6.34e-06	0.176838	NT	754	1	35842629	35847669
5	NA	GLM	MAF5	SNP	Benzylic alcohol_UR	6171533	6.62e-06	0.176276	NT	240	1	6171533	6171533
3	NA	GLM	G7	SNP	Benzylic alcohol_UR	5429482	6.83e-06	0.175858	NT	126	1	5429482	5429482
3	NA	GLM	MAF5	SNP	Benzylic alcohol_UR	5429482	6.83e-06	0.175858	NT	126	1	5429482	5429482
6	54	GLM	G7	SNP	Benzylic alcohol_UR	22496338	9.05e-06	0.172065	NT	420	2	22393667	22625006
6	54	GLM	MAF5	SNP	Benzylic alcohol_UR	22496338	9.05e-06	0.172065	NT	420	1	22393667	22625006
6	33	GLM	G7	SNP	Benzylic alcohol_UR	17066283	9.1e-06	0.171994	NT	244	1	16858027	17659192
6	33	GLM	MAF5	SNP	Benzylic alcohol_UR	17066283	9.1e-06	0.171994	NT	244	1	16858027	17659192
4	NA	GLM	G7	SNP	Benzylic alcohol_UR	27277631	9.27e-06	0.171748	NT	492	1	27277631	27277631
4	NA	GLM	MAF5	SNP	Benzylic alcohol_UR	27277631	9.27e-06	0.171748	NT	492	1	27277631	27277631
7	23	GLM	MAF5	SNP	Benzylic alcohol_UR	5508489	1.01e-05	0.170654	NT	215	2	5508489	5509061
7	24	GLM	MAF5	SNP	Benzylic alcohol_UR	5648277	1.01e-05	0.170654	NT	223	2	5596523	5648293
5	NA	GLM	NA	SSR	Benzylic alcohol_UR	28548687	1.28e-05	0.167495	NT	SSR	1	28548687	28548687
2	38	GLM	G7	SNP	Benzylic alcohol_UR	8232116	1.37e-05	0.166491	NT	349	2	8216923	8236790
2	38	GLM	MAF5	SNP	Benzylic alcohol_UR	8232116	1.37e-05	0.166491	NT	349	2	8216923	8236790
3	69	GLM	G7	SNP	Benzylic alcohol_UR	35617075	1.39e-05	0.166289	NT	741	2	35617075	35720227
3	69	GLM	MAF5	SNP	Benzylic alcohol_UR	35617075	1.39e-05	0.166289	NT	741	1	35617075	35720227
10	NA	GLM	MAF5	SNP	Benzylic alcohol_UR	3120295	1.4e-05	0.166211	NT	93	1	3120295	3120295
5	48	GLM	G7	SNP	Benzylic alcohol_UR	28210423	1.41e-05	0.166042	NT	432	1	28210423	28435165
5	48	GLM	MAF5	SNP	Benzylic alcohol_UR	28210423	1.41e-05	0.166042	NT	432	1	28210423	28435165
2	51	GLM	G7	SNP	Benzylic alcohol_UR	18466456	1.49e-05	0.165355	NT	489	1	18466430	18466456
2	51	GLM	MAF5	SNP	Benzylic alcohol_UR	18466456	1.49e-05	0.165355	NT	489	1	18466430	18466456
6	19	GLM	G7	SNP	Benzylic alcohol_UR	6124874	1.55e-05	0.164764	NT	126	1	6116647	6124874
6	19	GLM	MAF5	SNP	Benzylic alcohol_UR	6124874	1.55e-05	0.164764	NT	126	1	6116647	6124874
6	38	GLM	G7	SNP	Benzylic alcohol_UR	19920343	1.56e-05	0.164727	NT	309	1	19915910	19920343
6	38	GLM	MAF5	SNP	Benzylic alcohol_UR	19920343	1.56e-05	0.164727	NT	309	1	19915910	19920343
2	57	GLM	G7	SNP	Benzylic alcohol_UR	29679782	1.59e-05	0.16443	NT	562	1	27852246	29867634
11	NA	GLM	G7	SNP	Benzylic alcohol_UR	39134	1.59e-05	0.164474	NT	NA	1	39134	39134
2	34	GLM	G7	SNP	Benzylic alcohol_UR	6563390	1.65e-05	0.163926	NT	280	3	6444089	6563390
3	NA	GLM	NA	SSR	Benzylic alcohol_UR	35508213	2.72e-05	0.176363	NT	SSR	1	35508213	35508213
4	71	GLM	NA	SSR	Benzylic alcohol_UR	30699892	3.23e-05	0.146156	NT	SSR	1	30406710	30965982
5	NA	GLM	NA	SSR	Benzylic alcohol_UR	28548477	6.21e-05	0.151559	NT	SSR	1	28548477	28548477
3	55	GLM	NA	SSR	Benzylic alcohol_UR	30737092	8.69e-05	0.174488	NT	SSR	1	30271279	30948946
6	NA	GLM	NA	SSR	Benzylic alcohol_UR	3884725	9.68e-05	0.117424	NT	SSR	1	3884725	3884725
5	83	GLM	NA	SSR	Benzylic alcohol_UR	37855532	0.000131	0.151242	NT	SSR	1	37796878	37867770
6	60	GLM	NA	SSR	Benzylic alcohol_UR	23489326	0.000208	0.157381	NT	SSR	1	23432637	23531966
1	NA	GLM	NA	SSR	Benzylic alcohol_UR	24614721	0.000234	0.104145	NT	SSR	1	24614721	24614721
6	50	GLM	NA	SSR	Benzylic alcohol_UR	22113125	0.000241	0.0977364	NT	SSR	1	22110904	22196261
5	42	GLM	NA	SSR	Benzylic alcohol_UR	25976191	0.000256	0.222637	NT	SSR	1	24679572	27017453
3	58	GLM	MAF5	SNP	Cinnamaldehyde_R	31503427	1.39e-28	0.653632	T	588	2	31426718	31564785
2	45	GLM	MAF5	SNP	Cinnamaldehyde_R	11023043	1.59e-28	0.652864	T	412	3	10827790	11023043
2	57	GLM	MAF5	SNP	Cinnamaldehyde_R	28827440	1.75e-28	0.652306	T	555	3	27852246	29867634
3	NA	GLM	MAF5	SNP	Cinnamaldehyde_R	31597722	1.79e-28	0.652172	T	592	1	31597722	31597722
9	4	GLM	MAF5	SNP	Cinnamaldehyde_R	808001	1.83e-28	0.652037	T	34	5	713588	857818
9	NA	GLM	MAF5	SNP	Cinnamaldehyde_R	662500	1.89e-28	0.651853	T	27	1	662500	662500
2	56	GLM	MAF5	SNP	Cinnamaldehyde_R	25549521	2.05e-28	0.651378	T	539	5	23909636	27037630
4	NA	GLM	MAF5	SNP	Cinnamaldehyde_R	15388235	2.2e-28	0.650983	T	207	1	15388235	15388235
2	54	GLM	MAF5	SNP	Cinnamaldehyde_R	21605892	2.22e-28	0.650916	T	511	1	21605859	21605892
2	35	GLM	MAF5	SNP	Cinnamaldehyde_R	6709867	1.52e-21	0.547189	T	290	6	6579096	7156137
2	NA	GLM	MAF5	SNP	Cinnamaldehyde_R	10594076	1.63e-21	0.546698	T	402	1	10594076	10594076
2	NA	GLM	MAF5	SNP	Cinnamaldehyde_R	10542327	1.81e-21	0.545884	T	400	1	10542327	10542327
2	44	GLM	MAF5	SNP	Cinnamaldehyde_R	10082346	1.86e-21	0.545697	T	395	3	10071263	10447316
2	36	GLM	MAF5	SNP	Cinnamaldehyde_R	7529831	1.92e-21	0.545441	T	321	2	7324500	7617242
2	NA	GLM	MAF5	SNP	Cinnamaldehyde_R	7658187	1.92e-21	0.545446	T	324	1	7658187	7658187
2	36	GLM	NA	SSR	Cinnamaldehyde_R	7453377	1.6e-20	0.475946	T	SSR	1	7324500	7617242
1	56	GLM	MAF5	SNP	Cinnamaldehyde_R	27743259	1.39e-18	0.493187	T	522	1	27743259	27743274
1	18	GLM	NA	SSR	Cinnamaldehyde_R	5502436	4.39e-18	0.429542	T	SSR	1	5356899	5820933
1	17	GLM	MAF5	SNP	Cinnamaldehyde_R	5107269	3.5e-17	0.465446	T	166	5	4973179	5305096
4	73	GLM	G7	SNP	Cinnamaldehyde_R	31366888	3.61e-17	0.442381	T	NA	1	31245987	31391851
4	74	GLM	G7	SNP	Cinnamaldehyde_R	31743145	3.61e-17	0.442381	T	NA	2	31640263	31862741
2	37	GLM	MAF5	SNP	Cinnamaldehyde_R	8096771	4.16e-17	0.463907	T	342	6	7812200	8143718
1	NA	GLM	MAF5	SNP	Cinnamaldehyde_R	4921386	5.84e-17	0.460899	T	160	1	4921386	4921386
3	NA	GLM	MAF5	SNP	Cinnamaldehyde_R	31150156	6.41e-17	0.460057	T	571	1	31150156	31150156
3	57	GLM	MAF5	SNP	Cinnamaldehyde_R	31175109	7.15e-17	0.459086	T	574	5	31156760	31273833
3	55	GLM	MAF5	SNP	Cinnamaldehyde_R	30726014	7.61e-17	0.458524	T	550	19	30271279	30948946
2	39	GLM	NA	SSR	Cinnamaldehyde_R	8389914	9.49e-17	0.401332	T	SSR	1	8239972	8416672
4	71	GLM	G7	SNP	Cinnamaldehyde_R	30662924	3.35e-16	0.421862	T	NA	2	30406710	30965982
10	26	GLM	G7	SNP	Cinnamaldehyde_R	5308832	4.36e-16	0.44268	T	182	3	5153882	5419006
10	26	GLM	MAF5	SNP	Cinnamaldehyde_R	5308832	4.36e-16	0.44268	T	182	3	5153882	5419006
3	55	GLM	NA	SSR	Cinnamaldehyde_R	30620836	1.26e-15	0.367091	T	SSR	2	30271279	30948946
2	NA	GLM	MAF5	SNP	Cinnamaldehyde_R	10569044	1.59e-15	0.430612	T	401	1	10569044	10569044
10	15	GLM	G7	SNP	Cinnamaldehyde_R	3593240	2.68e-15	0.425705	T	111	2	3483824	3629707
10	15	GLM	MAF5	SNP	Cinnamaldehyde_R	3593240	2.68e-15	0.425705	T	111	2	3483824	3629707
6	33	GLM	G7	SNP	Cinnamaldehyde_R	16958126	3.03e-15	0.400829	T	NA	1	16858027	17659192
1	6	GLM	G7	SNP	Cinnamaldehyde_R	2724496	3.06e-15	0.400752	T	NA	5	2678044	2829157
1	NA	GLM	G7	SNP	Cinnamaldehyde_R	2853992	3.06e-15	0.400752	T	NA	1	2853992	2853992
2	NA	GLM	MAF5	SNP	Cinnamaldehyde_R	7772355	3.06e-15	0.424442	T	327	1	7772355	7772355
10	50	GLM	MAF5	SNP	Cinnamaldehyde_R	19996818	3.37e-15	0.423517	T	366	2	19952912	20057705
1	5	GLM	G7	SNP	Cinnamaldehyde_R	2504782	7.57e-15	0.391882	T	NA	1	2484281	2532862
4	NA	MLM	MAF5	SNP	Cinnamaldehyde_R	15388235	1.76e-14	0.401633	T	207	1	15388235	15388235
9	4	MLM	MAF5	SNP	Cinnamaldehyde_R	808001	3e-14	0.396819	T	34	1	713588	857818
2	57	MLM	MAF5	SNP	Cinnamaldehyde_R	28827440	3.18e-14	0.396503	T	555	3	27852246	29867634
3	58	MLM	MAF5	SNP	Cinnamaldehyde_R	31503427	3.62e-14	0.395345	T	588	1	31426718	31564785
2	54	MLM	MAF5	SNP	Cinnamaldehyde_R	21605892	3.67e-14	0.394978	T	511	1	21605859	21605892
2	56	MLM	MAF5	SNP	Cinnamaldehyde_R	23909636	3.78e-14	0.394726	T	527	3	23909636	27037630
9	NA	MLM	MAF5	SNP	Cinnamaldehyde_R	662500	3.92e-14	0.39442	T	27	1	662500	662500
3	57	MLM	MAF5	SNP	Cinnamaldehyde_R	31257366	3.97e-14	0.394258	T	578	2	31156760	31273833
9	5	GLM	MAF5	SNP	Cinnamaldehyde_R	1099370	4.06e-14	0.399315	T	42	1	1088620	1099704
2	45	MLM	MAF5	SNP	Cinnamaldehyde_R	11023043	4.26e-14	0.393863	T	412	1	10827790	11023043
3	NA	MLM	MAF5	SNP	Cinnamaldehyde_R	31597722	4.39e-14	0.393377	T	592	1	31597722	31597722
4	NA	GLM	G7	SNP	Cinnamaldehyde_R	31530074	5.31e-14	0.372405	T	NA	1	31530074	31530074
4	NA	GLM	G7	SNP	Cinnamaldehyde_R	31223779	1.19e-13	0.364161	T	NA	1	31223779	31223779
1	26	GLM	G7	SNP	Cinnamaldehyde_R	7409188	1.99e-13	0.383328	T	236	15	6834165	7942921
2	29	GLM	G7	SNP	Cinnamaldehyde_R	4437889	2.11e-13	0.358222	T	NA	1	4392501	4506260
4	NA	GLM	G7	SNP	Cinnamaldehyde_R	30979430	2.86e-13	0.355079	T	NA	1	30979430	30979430
2	50	GLM	MAF5	SNP	Cinnamaldehyde_R	18307050	3.59e-13	0.377281	T	484	1	18307050	18321142
6	50	GLM	NA	SSR	Cinnamaldehyde_R	22113125	4.51e-13	0.299063	T	SSR	1	22110904	22196261
4	40	GLM	G7	SNP	Cinnamaldehyde_R	23580610	6.45e-13	0.346545	T	NA	5	23463681	23682721
1	26	GLM	NA	SSR	Cinnamaldehyde_R	7541990	6.52e-13	0.312108	T	SSR	1	6834165	7942921
2	NA	GLM	MAF5	SNP	Cinnamaldehyde_R	6575966	6.8e-13	0.370661	T	282	1	6575966	6575966
9	6	GLM	MAF5	SNP	Cinnamaldehyde_R	1162203	7.36e-13	0.369843	T	48	2	1109358	1233013
10	27	GLM	G7	SNP	Cinnamaldehyde_R	6158785	1.36e-12	0.363374	T	188	3	6023982	6718126
10	27	GLM	MAF5	SNP	Cinnamaldehyde_R	6158785	1.36e-12	0.363374	T	188	3	6023982	6718126
10	42	GLM	G7	SNP	Cinnamaldehyde_R	17581882	1.51e-12	0.362308	T	314	3	17578812	17714542
10	42	GLM	MAF5	SNP	Cinnamaldehyde_R	17581882	1.51e-12	0.362308	T	314	3	17578812	17714542
10	27	GLM	NA	SSR	Cinnamaldehyde_R	6167221	1.76e-12	0.365955	T	SSR	1	6023982	6718126
1	27	GLM	G7	SNP	Cinnamaldehyde_R	8142907	1.9e-12	0.359855	T	254	4	7982833	8234867
1	27	GLM	MAF5	SNP	Cinnamaldehyde_R	8142907	1.9e-12	0.359855	T	254	4	7982833	8234867
10	41	GLM	G7	SNP	Cinnamaldehyde_R	17509931	2.06e-12	0.35902	T	309	4	17324829	17542507
10	41	GLM	MAF5	SNP	Cinnamaldehyde_R	17509931	2.06e-12	0.35902	T	309	4	17324829	17542507
1	23	GLM	G7	SNP	Cinnamaldehyde_R	6564316	4.01e-12	0.326993	T	NA	8	6381788	6674915
10	24	GLM	G7	SNP	Cinnamaldehyde_R	4610049	4.59e-12	0.350474	T	164	5	4462717	4610049
10	24	GLM	MAF5	SNP	Cinnamaldehyde_R	4610049	4.59e-12	0.350474	T	164	5	4462717	4610049
4	NA	GLM	G7	SNP	Cinnamaldehyde_R	21992161	5.03e-12	0.324529	T	NA	1	21992161	21992161
4	38	GLM	G7	SNP	Cinnamaldehyde_R	22503297	5.03e-12	0.324529	T	NA	1	22435678	22617119
4	NA	GLM	G7	SNP	Cinnamaldehyde_R	23382762	5.03e-12	0.324529	T	NA	1	23382762	23382762
1	NA	GLM	NA	SSR	Cinnamaldehyde_R	4634077	7.73e-12	0.285851	T	SSR	1	4634077	4634077
4	39	GLM	G7	SNP	Cinnamaldehyde_R	23199282	1.16e-11	0.315387	T	348	2	22671107	23365683
4	39	GLM	MAF5	SNP	Cinnamaldehyde_R	23199282	1.16e-11	0.315387	T	348	3	22671107	23365683
1	23	GLM	MAF5	SNP	Cinnamaldehyde_R	6652603	1.22e-11	0.339864	T	219	1	6381788	6674915
4	NA	GLM	G7	SNP	Cinnamaldehyde_R	20988526	2.08e-11	0.308867	T	NA	1	20988526	20988526
6	34	GLM	G7	SNP	Cinnamaldehyde_R	17967377	2.51e-11	0.306799	T	NA	1	17848837	18092432
9	NA	GLM	MAF5	SNP	Cinnamaldehyde_R	999623	4e-11	0.326803	T	39	1	999623	999623
10	37	GLM	G7	SNP	Cinnamaldehyde_R	15403878	4.52e-11	0.325454	T	270	3	14524131	15403878
10	37	GLM	MAF5	SNP	Cinnamaldehyde_R	15403878	4.52e-11	0.325454	T	270	3	14524131	15403878
1	26	GLM	MAF5	SNP	Cinnamaldehyde_R	7239407	4.59e-11	0.325287	T	233	15	6834165	7942921
1	9	GLM	NA	SSR	Cinnamaldehyde_R	3879916	4.61e-11	0.237891	T	SSR	2	3648137	4066843
10	29	GLM	G7	SNP	Cinnamaldehyde_R	7584692	5.22e-11	0.32385	T	203	2	7296608	7879432
10	29	GLM	MAF5	SNP	Cinnamaldehyde_R	7584692	5.22e-11	0.32385	T	203	2	7296608	7879432
10	32	GLM	G7	SNP	Cinnamaldehyde_R	10594479	6.02e-11	0.322248	T	232	3	10016442	10644720
10	32	GLM	MAF5	SNP	Cinnamaldehyde_R	10594479	6.02e-11	0.322248	T	232	3	10016442	10644720
10	NA	GLM	G7	SNP	Cinnamaldehyde_R	20233019	7.92e-11	0.319174	T	368	1	20233019	20233019
10	NA	GLM	MAF5	SNP	Cinnamaldehyde_R	20233019	7.92e-11	0.319174	T	368	1	20233019	20233019
8	39	GLM	NA	SSR	Cinnamaldehyde_R	16495267	8.04e-11	0.27796	T	SSR	1	16439377	16777962
4	72	GLM	G7	SNP	Cinnamaldehyde_R	31041137	9.35e-11	0.291958	T	NA	1	31023477	31052545
4	NA	GLM	G7	SNP	Cinnamaldehyde_R	31108166	9.35e-11	0.291958	T	NA	1	31108166	31108166
1	25	GLM	G7	SNP	Cinnamaldehyde_R	6834137	9.4e-11	0.317241	T	226	1	6827616	6834137
1	25	GLM	MAF5	SNP	Cinnamaldehyde_R	6834137	9.4e-11	0.317241	T	226	1	6827616	6834137
2	58	GLM	MAF5	SNP	Cinnamaldehyde_R	30144367	9.45e-11	0.317186	T	566	1	29884879	30487524
10	46	GLM	G7	SNP	Cinnamaldehyde_R	18909079	1.01e-10	0.316434	T	336	1	18748247	19223422
10	46	GLM	MAF5	SNP	Cinnamaldehyde_R	18909079	1.01e-10	0.316434	T	336	1	18748247	19223422
10	NA	GLM	G7	SNP	Cinnamaldehyde_R	5111659	1.05e-10	0.316034	T	174	1	5111659	5111659
10	NA	GLM	MAF5	SNP	Cinnamaldehyde_R	5111659	1.05e-10	0.316034	T	174	1	5111659	5111659
4	NA	GLM	G7	SNP	Cinnamaldehyde_R	21295349	1.09e-10	0.290246	T	NA	1	21295349	21295349
10	NA	GLM	G7	SNP	Cinnamaldehyde_R	10644750	1.14e-10	0.315059	T	234	1	10644750	10644750
10	NA	GLM	MAF5	SNP	Cinnamaldehyde_R	10644750	1.14e-10	0.315059	T	234	1	10644750	10644750
3	54	GLM	MAF5	SNP	Cinnamaldehyde_R	30101557	1.21e-10	0.314416	T	519	3	30011227	30243269
2	NA	GLM	MAF5	SNP	Cinnamaldehyde_R	17915462	1.26e-10	0.313938	T	482	1	17915462	17915462
4	37	GLM	G7	SNP	Cinnamaldehyde_R	22292279	1.63e-10	0.285602	T	NA	1	22286672	22427137
1	NA	GLM	G7	SNP	Cinnamaldehyde_R	3501693	1.8e-10	0.284471	T	NA	1	3501693	3501693
9	5	GLM	G7	SNP	Cinnamaldehyde_R	1088718	2.17e-10	0.282305	T	NA	1	1088620	1099704
2	NA	GLM	MAF5	SNP	Cinnamaldehyde_R	18955850	2.23e-10	0.307415	T	491	1	18955850	18955850
2	NA	GLM	MAF5	SNP	Cinnamaldehyde_R	23266545	2.34e-10	0.306892	T	523	1	23266545	23266545
1	21	GLM	G7	SNP	Cinnamaldehyde_R	5940526	2.55e-10	0.305903	T	192	3	5940526	6204028
1	21	GLM	MAF5	SNP	Cinnamaldehyde_R	5940526	2.55e-10	0.305903	T	192	3	5940526	6204028
7	NA	GLM	G7	SNP	Cinnamaldehyde_R	5106587	2.57e-10	0.280365	T	206	1	5106587	5106587
7	NA	GLM	MAF5	SNP	Cinnamaldehyde_R	5106587	2.57e-10	0.280365	T	206	1	5106587	5106587
1	2	GLM	G7	SNP	Cinnamaldehyde_R	527667	2.72e-10	0.279671	T	NA	8	311606	555162
2	NA	GLM	NA	SSR	Cinnamaldehyde_R	11231613	2.86e-10	0.364215	T	SSR	1	11231613	11231613
2	NA	GLM	G7	SNP	Cinnamaldehyde_R	8418582	3.34e-10	0.302771	T	361	1	8418582	8418582
5	32	GLM	G7	SNP	Cinnamaldehyde_R	7385372	3.34e-10	0.30277	T	251	1	6478333	7385372
2	NA	GLM	MAF5	SNP	Cinnamaldehyde_R	8418582	3.34e-10	0.302771	T	361	1	8418582	8418582
5	32	GLM	MAF5	SNP	Cinnamaldehyde_R	7385372	3.34e-10	0.30277	T	251	1	6478333	7385372
2	42	GLM	G7	SNP	Cinnamaldehyde_R	8719682	3.61e-10	0.301882	T	374	3	8719682	8881589
2	42	GLM	MAF5	SNP	Cinnamaldehyde_R	8719682	3.61e-10	0.301882	T	374	3	8719682	8881589
2	53	GLM	MAF5	SNP	Cinnamaldehyde_R	19975938	3.64e-10	0.301797	T	504	2	19631734	20486392
2	NA	GLM	G7	SNP	Cinnamaldehyde_R	7158874	3.98e-10	0.30075	T	303	1	7158874	7158874
2	NA	GLM	MAF5	SNP	Cinnamaldehyde_R	7158874	3.98e-10	0.30075	T	303	1	7158874	7158874
2	33	GLM	G7	SNP	Cinnamaldehyde_R	6315669	4e-10	0.300716	T	269	10	5964547	6363795
2	33	GLM	MAF5	SNP	Cinnamaldehyde_R	6315669	4e-10	0.300716	T	269	9	5964547	6363795
2	32	GLM	NA	SSR	Cinnamaldehyde_R	5807095	4.4e-10	0.234817	T	SSR	2	4901678	5954795
3	56	GLM	MAF5	SNP	Cinnamaldehyde_R	31080756	4.42e-10	0.299539	T	568	2	31073768	31080756
4	NA	GLM	G7	SNP	Cinnamaldehyde_R	22227882	4.62e-10	0.273526	T	NA	1	22227882	22227882
8	32	GLM	G7	SNP	Cinnamaldehyde_R	8271497	4.65e-10	0.273464	T	NA	1	8260059	8841050
8	NA	GLM	G7	SNP	Cinnamaldehyde_R	9096385	4.65e-10	0.273464	T	NA	1	9096385	9096385
8	NA	GLM	G7	SNP	Cinnamaldehyde_R	9726041	4.65e-10	0.273464	T	NA	1	9726041	9726041
8	NA	GLM	G7	SNP	Cinnamaldehyde_R	9844983	4.65e-10	0.273464	T	NA	1	9844983	9844983
8	35	GLM	G7	SNP	Cinnamaldehyde_R	10278540	4.65e-10	0.273464	T	NA	2	10010983	11042371
8	NA	GLM	G7	SNP	Cinnamaldehyde_R	11775292	4.65e-10	0.273464	T	NA	1	11775292	11775292
8	36	GLM	G7	SNP	Cinnamaldehyde_R	11917547	4.65e-10	0.273464	T	NA	2	11815420	12950217
8	NA	GLM	G7	SNP	Cinnamaldehyde_R	12950284	4.65e-10	0.273464	T	NA	1	12950284	12950284
8	NA	GLM	G7	SNP	Cinnamaldehyde_R	14431141	4.65e-10	0.273464	T	NA	1	14431141	14431141
4	NA	GLM	G7	SNP	Cinnamaldehyde_R	31422540	5.47e-10	0.271555	T	NA	1	31422540	31422540
2	34	GLM	NA	SSR	Cinnamaldehyde_R	6500653	5.59e-10	0.265018	T	SSR	1	6444089	6563390
2	44	GLM	G7	SNP	Cinnamaldehyde_R	10447316	5.97e-10	0.296053	T	398	1	10071263	10447316
10	38	GLM	G7	SNP	Cinnamaldehyde_R	15608051	5.98e-10	0.296037	T	273	1	15418463	15921896
10	38	GLM	MAF5	SNP	Cinnamaldehyde_R	15608051	5.98e-10	0.296037	T	273	1	15418463	15921896
3	62	GLM	NA	SSR	Cinnamaldehyde_R	32501489	6.03e-10	0.272043	T	SSR	1	32075624	33514225
1	12	GLM	G7	SNP	Cinnamaldehyde_R	4171636	6.59e-10	0.294905	T	131	3	4171635	4226176
1	12	GLM	MAF5	SNP	Cinnamaldehyde_R	4171636	6.59e-10	0.294905	T	131	3	4171635	4226176
3	59	GLM	MAF5	SNP	Cinnamaldehyde_R	31708012	6.65e-10	0.294809	T	595	2	31603638	31974346
1	13	GLM	G7	SNP	Cinnamaldehyde_R	4277169	6.76e-10	0.294618	T	137	4	4277169	4495991
1	13	GLM	MAF5	SNP	Cinnamaldehyde_R	4277169	6.76e-10	0.294618	T	137	4	4277169	4495991
10	50	GLM	G7	SNP	Cinnamaldehyde_R	19963066	7.69e-10	0.293104	T	365	1	19952912	20057705
2	NA	MLM	MAF5	SNP	Cinnamaldehyde_R	17915462	7.84e-10	0.296112	T	482	1	17915462	17915462
10	40	GLM	G7	SNP	Cinnamaldehyde_R	16713975	8.03e-10	0.292606	T	297	5	16208413	17314800
10	40	GLM	MAF5	SNP	Cinnamaldehyde_R	16713975	8.03e-10	0.292606	T	297	5	16208413	17314800
4	NA	GLM	G7	SNP	Cinnamaldehyde_R	31455060	8.07e-10	0.266994	T	NA	1	31455060	31455060
10	36	GLM	G7	SNP	Cinnamaldehyde_R	14079487	8.36e-10	0.292131	T	256	2	13349399	14327326
10	36	GLM	MAF5	SNP	Cinnamaldehyde_R	14079487	8.36e-10	0.292131	T	256	2	13349399	14327326
4	NA	GLM	MAF5	SNP	Cinnamaldehyde_R	22427182	8.88e-10	0.265868	T	326	1	22427182	22427182
2	NA	GLM	G7	SNP	Cinnamaldehyde_R	23504671	9.63e-10	0.290471	T	525	1	23504671	23504671
2	NA	GLM	MAF5	SNP	Cinnamaldehyde_R	23504671	9.63e-10	0.290471	T	525	1	23504671	23504671
7	21	GLM	G7	SNP	Cinnamaldehyde_R	4824487	9.66e-10	0.290432	T	197	1	4824487	4831886
7	21	GLM	MAF5	SNP	Cinnamaldehyde_R	4824487	9.66e-10	0.290432	T	197	1	4824487	4831886
1	4	GLM	G7	SNP	Cinnamaldehyde_R	1601089	1.12e-09	0.263089	T	NA	16	805132	2445782
2	55	GLM	MAF5	SNP	Cinnamaldehyde_R	23034211	1.16e-09	0.288325	T	519	1	22102099	23107515
1	9	GLM	G7	SNP	Cinnamaldehyde_R	4022340	1.18e-09	0.288125	T	117	4	3648137	4066843
1	9	GLM	MAF5	SNP	Cinnamaldehyde_R	4022340	1.18e-09	0.288125	T	117	7	3648137	4066843
4	NA	GLM	MAF5	SNP	Cinnamaldehyde_R	15355500	1.24e-09	0.287496	T	203	1	15355500	15355500
4	NA	GLM	MAF5	SNP	Cinnamaldehyde_R	15412115	1.38e-09	0.286278	T	209	1	15412115	15412115
1	10	GLM	G7	SNP	Cinnamaldehyde_R	4134570	1.41e-09	0.285964	T	125	2	4114978	4134570
1	10	GLM	MAF5	SNP	Cinnamaldehyde_R	4134570	1.41e-09	0.285964	T	125	3	4114978	4134570
1	7	GLM	G7	SNP	Cinnamaldehyde_R	3398183	1.45e-09	0.285625	T	102	11	3083032	3398183
1	7	GLM	MAF5	SNP	Cinnamaldehyde_R	3398183	1.45e-09	0.285625	T	102	11	3083032	3398183
10	39	GLM	G7	SNP	Cinnamaldehyde_R	15924015	1.81e-09	0.283008	T	281	1	15924015	16066743
10	39	GLM	MAF5	SNP	Cinnamaldehyde_R	15924015	1.81e-09	0.283008	T	281	1	15924015	16066743
1	18	GLM	G7	SNP	Cinnamaldehyde_R	5554540	1.98e-09	0.281972	T	175	1	5356899	5820933
1	18	GLM	MAF5	SNP	Cinnamaldehyde_R	5554540	1.98e-09	0.281972	T	175	1	5356899	5820933
1	NA	GLM	NA	SSR	Cinnamaldehyde_R	24614721	2.08e-09	0.233974	T	SSR	1	24614721	24614721
7	22	GLM	G7	SNP	Cinnamaldehyde_R	5055592	2.12e-09	0.281182	T	203	1	5055592	5055594
7	22	GLM	MAF5	SNP	Cinnamaldehyde_R	5055592	2.12e-09	0.281182	T	203	1	5055592	5055594
8	37	GLM	G7	SNP	Cinnamaldehyde_R	14583735	2.37e-09	0.254235	T	NA	3	14444953	15439624
1	28	GLM	G7	SNP	Cinnamaldehyde_R	8557657	2.46e-09	0.279378	T	260	2	8510583	8805066
1	28	GLM	MAF5	SNP	Cinnamaldehyde_R	8557657	2.46e-09	0.279378	T	260	2	8510583	8805066
3	NA	GLM	G7	SNP	Cinnamaldehyde_R	5664825	2.65e-09	0.278512	T	128	1	5664825	5664825
3	NA	GLM	MAF5	SNP	Cinnamaldehyde_R	5664825	2.65e-09	0.278512	T	128	1	5664825	5664825
4	NA	GLM	G7	SNP	Cinnamaldehyde_R	21800929	2.73e-09	0.252517	T	307	1	21800929	21800929
4	NA	GLM	MAF5	SNP	Cinnamaldehyde_R	21800929	2.73e-09	0.252517	T	307	1	21800929	21800929
2	NA	MLM	MAF5	SNP	Cinnamaldehyde_R	21645995	2.77e-09	0.281774	T	512	1	21645995	21645995
4	NA	GLM	MAF5	SNP	Cinnamaldehyde_R	585148	2.88e-09	0.277524	T	24	1	585148	585148
1	50	GLM	G7	SNP	Cinnamaldehyde_R	23588830	3.39e-09	0.275572	T	473	1	22126594	24182221
6	64	GLM	G7	SNP	Cinnamaldehyde_R	23951451	3.39e-09	0.275556	T	481	9	23913803	25147021
1	50	GLM	MAF5	SNP	Cinnamaldehyde_R	23588830	3.39e-09	0.275572	T	473	1	22126594	24182221
6	64	GLM	MAF5	SNP	Cinnamaldehyde_R	23951451	3.39e-09	0.275556	T	481	8	23913803	25147021
1	NA	GLM	G7	SNP	Cinnamaldehyde_R	19428286	3.46e-09	0.275321	T	449	1	19428286	19428286
1	NA	GLM	MAF5	SNP	Cinnamaldehyde_R	19428286	3.46e-09	0.275321	T	449	1	19428286	19428286
1	16	GLM	G7	SNP	Cinnamaldehyde_R	4773526	3.72e-09	0.27443	T	156	1	4668890	4875804
1	16	GLM	MAF5	SNP	Cinnamaldehyde_R	4773526	3.72e-09	0.27443	T	156	2	4668890	4875804
2	31	GLM	NA	SSR	Cinnamaldehyde_R	4817072	3.97e-09	0.26666	T	SSR	1	4808252	4821878
5	NA	GLM	MAF5	SNP	Cinnamaldehyde_R	20034748	4.12e-09	0.273233	T	325	1	20034748	20034748
1	44	GLM	G7	SNP	Cinnamaldehyde_R	16855773	4.22e-09	0.272923	T	418	3	16773338	16855773
1	48	GLM	G7	SNP	Cinnamaldehyde_R	19035561	4.87e-09	0.271207	T	445	3	18713092	19100918
1	48	GLM	MAF5	SNP	Cinnamaldehyde_R	19035561	4.87e-09	0.271207	T	445	3	18713092	19100918
6	50	GLM	G7	SNP	Cinnamaldehyde_R	22114520	5.16e-09	0.270513	T	394	3	22110904	22196261
6	50	GLM	MAF5	SNP	Cinnamaldehyde_R	22114520	5.16e-09	0.270513	T	394	3	22110904	22196261
10	56	GLM	G7	SNP	Cinnamaldehyde_R	21453488	5.34e-09	0.270102	T	407	3	21403079	21624530
10	56	GLM	MAF5	SNP	Cinnamaldehyde_R	21453488	5.34e-09	0.270102	T	407	3	21403079	21624530
10	44	GLM	G7	SNP	Cinnamaldehyde_R	18551852	7.66e-09	0.26573	T	328	1	18084832	18551852
10	44	GLM	MAF5	SNP	Cinnamaldehyde_R	18551852	7.66e-09	0.26573	T	328	1	18084832	18551852
9	NA	GLM	MAF5	SNP	Cinnamaldehyde_R	21805523	7.89e-09	0.265377	T	407	1	21805523	21805523
6	59	GLM	G7	SNP	Cinnamaldehyde_R	23373390	1.02e-08	0.262235	T	454	4	23150205	23373390
6	59	GLM	MAF5	SNP	Cinnamaldehyde_R	23373390	1.02e-08	0.262235	T	454	4	23150205	23373390
5	82	GLM	G7	SNP	Cinnamaldehyde_R	37680406	1.03e-08	0.23649	T	NA	1	37593471	37755711
1	NA	GLM	G7	SNP	Cinnamaldehyde_R	17237422	1.06e-08	0.261744	T	429	1	17237422	17237422
1	NA	GLM	MAF5	SNP	Cinnamaldehyde_R	17237422	1.06e-08	0.261744	T	429	1	17237422	17237422
1	40	GLM	NA	SSR	Cinnamaldehyde_R	15431444	1.06e-08	0.247611	T	SSR	1	15145913	15510831
8	NA	GLM	G7	SNP	Cinnamaldehyde_R	9004217	1.07e-08	0.235988	T	NA	1	9004217	9004217
8	NA	GLM	G7	SNP	Cinnamaldehyde_R	9840784	1.08e-08	0.235893	T	NA	1	9840784	9840784
1	45	GLM	G7	SNP	Cinnamaldehyde_R	17021446	1.12e-08	0.261078	T	426	1	17021402	17021446
3	37	GLM	G7	SNP	Cinnamaldehyde_R	25913172	1.12e-08	0.261086	T	328	3	25913172	25938627
1	45	GLM	MAF5	SNP	Cinnamaldehyde_R	17021446	1.12e-08	0.261078	T	426	1	17021402	17021446
3	37	GLM	MAF5	SNP	Cinnamaldehyde_R	25913172	1.12e-08	0.261086	T	328	3	25913172	25938627
4	NA	GLM	G7	SNP	Cinnamaldehyde_R	605912	1.22e-08	0.234375	T	NA	1	605912	605912
1	NA	GLM	G7	SNP	Cinnamaldehyde_R	3493336	1.27e-08	0.233915	T	NA	1	3493336	3493336
1	47	GLM	G7	SNP	Cinnamaldehyde_R	17976793	1.37e-08	0.258633	T	437	1	17976793	17984066
1	47	GLM	MAF5	SNP	Cinnamaldehyde_R	17976793	1.37e-08	0.258633	T	437	1	17976793	17984066
1	49	GLM	G7	SNP	Cinnamaldehyde_R	21214686	1.41e-08	0.258322	T	463	3	19707891	21765472
1	49	GLM	MAF5	SNP	Cinnamaldehyde_R	21214686	1.41e-08	0.258322	T	463	3	19707891	21765472
6	2	GLM	G7	SNP	Cinnamaldehyde_R	655077	1.58e-08	0.256871	T	19	2	277517	655187
6	2	GLM	MAF5	SNP	Cinnamaldehyde_R	655077	1.58e-08	0.256871	T	19	2	277517	655187
1	NA	GLM	G7	SNP	Cinnamaldehyde_R	4667668	1.65e-08	0.256391	T	152	1	4667668	4667668
1	NA	GLM	MAF5	SNP	Cinnamaldehyde_R	4667668	1.65e-08	0.256391	T	152	1	4667668	4667668
1	44	GLM	MAF5	SNP	Cinnamaldehyde_R	16773338	1.73e-08	0.25578	T	413	3	16773338	16855773
6	NA	GLM	G7	SNP	Cinnamaldehyde_R	25735063	1.8e-08	0.255291	T	528	1	25735063	25735063
6	NA	GLM	MAF5	SNP	Cinnamaldehyde_R	25735063	1.8e-08	0.255291	T	528	1	25735063	25735063
1	NA	GLM	G7	SNP	Cinnamaldehyde_R	3399842	1.92e-08	0.254494	T	103	1	3399842	3399842
1	NA	GLM	MAF5	SNP	Cinnamaldehyde_R	3399842	1.92e-08	0.254494	T	103	1	3399842	3399842
4	NA	GLM	G7	SNP	Cinnamaldehyde_R	21773964	2.01e-08	0.228264	T	305	1	21773964	21773964
4	NA	GLM	MAF5	SNP	Cinnamaldehyde_R	21773964	2.01e-08	0.228264	T	305	1	21773964	21773964
3	NA	GLM	MAF5	SNP	Cinnamaldehyde_R	32014866	2.04e-08	0.253716	T	603	1	32014866	32014866
6	60	GLM	NA	SSR	Cinnamaldehyde_R	23489326	2.11e-08	0.278869	T	SSR	1	23432637	23531966
5	7	GLM	G7	SNP	Cinnamaldehyde_R	1053145	2.23e-08	0.226961	T	NA	1	906367	1240806
4	40	GLM	MAF5	SNP	Cinnamaldehyde_R	23520672	2.33e-08	0.226416	T	359	1	23463681	23682721
3	NA	GLM	NA	SSR	Cinnamaldehyde_R	14462884	2.35e-08	0.246317	T	SSR	1	14462884	14462884
1	NA	GLM	G7	SNP	Cinnamaldehyde_R	4158845	2.4e-08	0.25174	T	128	1	4158845	4158845
1	NA	GLM	MAF5	SNP	Cinnamaldehyde_R	4158845	2.4e-08	0.25174	T	128	1	4158845	4158845
3	61	GLM	MAF5	SNP	Cinnamaldehyde_R	32043260	2.45e-08	0.251469	T	607	1	32027199	32073096
3	59	GLM	G7	SNP	Cinnamaldehyde_R	31707964	2.56e-08	0.250958	T	594	1	31603638	31974346
2	NA	GLM	G7	SNP	Cinnamaldehyde_R	23613002	2.64e-08	0.250572	T	526	1	23613002	23613002
2	NA	GLM	MAF5	SNP	Cinnamaldehyde_R	23613002	2.64e-08	0.250572	T	526	1	23613002	23613002
2	32	GLM	G7	SNP	Cinnamaldehyde_R	5845559	2.69e-08	0.250322	T	248	3	4901678	5954795
2	32	GLM	MAF5	SNP	Cinnamaldehyde_R	5845559	2.69e-08	0.250322	T	248	3	4901678	5954795
6	49	GLM	G7	SNP	Cinnamaldehyde_R	21961625	2.81e-08	0.249774	T	382	2	21698381	22089947
6	49	GLM	MAF5	SNP	Cinnamaldehyde_R	21961625	2.81e-08	0.249774	T	382	2	21698381	22089947
4	28	GLM	NA	SSR	Cinnamaldehyde_R	16297711	2.95e-08	0.23414	T	SSR	1	15421975	16348316
1	3	GLM	G7	SNP	Cinnamaldehyde_R	588790	2.96e-08	0.223457	T	NA	4	588709	750219
1	58	GLM	G7	SNP	Cinnamaldehyde_R	28105561	3.08e-08	0.248662	T	534	3	27913878	28105561
1	58	GLM	MAF5	SNP	Cinnamaldehyde_R	28105561	3.08e-08	0.248662	T	534	3	27913878	28105561
1	59	GLM	G7	SNP	Cinnamaldehyde_R	28459301	3.09e-08	0.222947	T	NA	1	28134545	28738499
1	1	GLM	G7	SNP	Cinnamaldehyde_R	236380	3.28e-08	0.222209	T	NA	4	152064	305247
10	NA	GLM	G7	SNP	Cinnamaldehyde_R	553387	3.44e-08	0.221613	T	18	1	553387	553387
10	NA	GLM	MAF5	SNP	Cinnamaldehyde_R	553387	3.44e-08	0.221613	T	18	1	553387	553387
8	NA	GLM	G7	SNP	Cinnamaldehyde_R	14444884	3.51e-08	0.221372	T	NA	1	14444884	14444884
10	NA	GLM	G7	SNP	Cinnamaldehyde_R	4369312	3.77e-08	0.246126	T	154	1	4369312	4369312
10	NA	GLM	MAF5	SNP	Cinnamaldehyde_R	4369312	3.77e-08	0.246126	T	154	1	4369312	4369312
3	38	GLM	G7	SNP	Cinnamaldehyde_R	26421993	4.73e-08	0.243309	T	355	3	26417575	26425518
3	38	GLM	MAF5	SNP	Cinnamaldehyde_R	26421993	4.73e-08	0.243309	T	355	3	26417575	26425518
4	65	GLM	NA	SSR	Cinnamaldehyde_R	29193642	5.4e-08	0.194207	T	SSR	2	28951105	29493076
5	NA	GLM	G7	SNP	Cinnamaldehyde_R	30276019	5.43e-08	0.24158	T	505	1	30276019	30276019
5	NA	GLM	MAF5	SNP	Cinnamaldehyde_R	30276019	5.43e-08	0.24158	T	505	1	30276019	30276019
6	20	GLM	G7	SNP	Cinnamaldehyde_R	6882194	5.51e-08	0.241395	T	140	5	6295665	8100534
6	20	GLM	MAF5	SNP	Cinnamaldehyde_R	6882194	5.51e-08	0.241395	T	140	5	6295665	8100534
9	25	GLM	G7	SNP	Cinnamaldehyde_R	7549100	5.86e-08	0.214963	T	NA	1	7542185	7622307
5	NA	GLM	G7	SNP	Cinnamaldehyde_R	30365664	5.87e-08	0.240588	T	509	1	30365664	30365664
5	NA	GLM	MAF5	SNP	Cinnamaldehyde_R	30365664	5.87e-08	0.240588	T	509	1	30365664	30365664
6	NA	GLM	NA	SSR	Cinnamaldehyde_R	218625	6.05e-08	0.221464	T	SSR	1	218625	218625
11	NA	GLM	NA	SSR	Cinnamaldehyde_R	NA	6.19e-08	0.235764	T	SSR	1	NA	NA
3	55	GLM	G7	SNP	Cinnamaldehyde_R	30637364	6.25e-08	0.239801	T	546	1	30271279	30948946
7	NA	GLM	G7	SNP	Cinnamaldehyde_R	5316290	6.77e-08	0.238799	T	209	1	5316290	5316290
7	NA	GLM	MAF5	SNP	Cinnamaldehyde_R	5316290	6.77e-08	0.238799	T	209	1	5316290	5316290
9	NA	GLM	G7	SNP	Cinnamaldehyde_R	936012	7.53e-08	0.237463	T	38	1	936012	936012
9	NA	GLM	MAF5	SNP	Cinnamaldehyde_R	936012	7.53e-08	0.237463	T	38	1	936012	936012
4	67	GLM	G7	SNP	Cinnamaldehyde_R	29891425	7.71e-08	0.211521	T	NA	5	29641256	29939344
1	53	GLM	G7	SNP	Cinnamaldehyde_R	26472985	7.77e-08	0.237069	T	501	2	26356034	26472985
1	53	GLM	MAF5	SNP	Cinnamaldehyde_R	26472985	7.77e-08	0.237069	T	501	2	26356034	26472985
2	NA	MLM	MAF5	SNP	Cinnamaldehyde_R	17694583	8.27e-08	0.239685	T	481	1	17694583	17694583
10	57	GLM	G7	SNP	Cinnamaldehyde_R	21781099	8.77e-08	0.235538	T	423	2	21664591	21781099
10	57	GLM	MAF5	SNP	Cinnamaldehyde_R	21781099	8.77e-08	0.235538	T	423	1	21664591	21781099
1	NA	GLM	G7	SNP	Cinnamaldehyde_R	4931650	8.78e-08	0.235519	T	161	1	4931650	4931650
1	NA	GLM	MAF5	SNP	Cinnamaldehyde_R	4931650	8.78e-08	0.235519	T	161	1	4931650	4931650
1	42	GLM	G7	SNP	Cinnamaldehyde_R	16162560	9.1e-08	0.235072	T	401	1	16162557	16162560
1	42	GLM	MAF5	SNP	Cinnamaldehyde_R	16162560	9.1e-08	0.235072	T	401	1	16162557	16162560
1	14	GLM	G7	SNP	Cinnamaldehyde_R	4498932	9.53e-08	0.234487	T	144	1	4498874	4528589
1	14	GLM	MAF5	SNP	Cinnamaldehyde_R	4498932	9.53e-08	0.234487	T	144	1	4498874	4528589
2	NA	GLM	MAF5	SNP	Cinnamaldehyde_R	7285337	9.61e-08	0.234385	T	310	1	7285337	7285337
1	NA	GLM	G7	SNP	Cinnamaldehyde_R	26932669	1.01e-07	0.233734	T	515	1	26932669	26932669
1	NA	GLM	MAF5	SNP	Cinnamaldehyde_R	26932669	1.01e-07	0.233734	T	515	1	26932669	26932669
6	63	GLM	G7	SNP	Cinnamaldehyde_R	23848056	1.03e-07	0.233505	T	476	1	23848056	23864782
6	63	GLM	MAF5	SNP	Cinnamaldehyde_R	23848056	1.03e-07	0.233505	T	476	1	23848056	23864782
3	NA	GLM	NA	SSR	Cinnamaldehyde_R	35508213	1.06e-07	0.240696	T	SSR	1	35508213	35508213
1	40	GLM	G7	SNP	Cinnamaldehyde_R	15413029	1.07e-07	0.233069	T	393	2	15145913	15510831
1	40	GLM	MAF5	SNP	Cinnamaldehyde_R	15413029	1.07e-07	0.233069	T	393	2	15145913	15510831
1	4	GLM	MAF5	SNP	Cinnamaldehyde_R	2330059	1.11e-07	0.232588	T	66	15	805132	2445782
2	44	MLM	MAF5	SNP	Cinnamaldehyde_R	10082346	1.13e-07	0.233033	T	395	1	10071263	10447316
6	23	GLM	G7	SNP	Cinnamaldehyde_R	11029605	1.14e-07	0.232177	T	170	2	10172235	11576647
6	23	GLM	MAF5	SNP	Cinnamaldehyde_R	11029605	1.14e-07	0.232177	T	170	2	10172235	11576647
6	54	GLM	G7	SNP	Cinnamaldehyde_R	22625006	1.19e-07	0.23172	T	424	2	22393667	22625006
6	54	GLM	MAF5	SNP	Cinnamaldehyde_R	22625006	1.19e-07	0.23172	T	424	2	22393667	22625006
10	26	MLM	MAF5	SNP	Cinnamaldehyde_R	5308832	1.24e-07	0.232003	T	182	1	5153882	5419006
6	30	GLM	G7	SNP	Cinnamaldehyde_R	14589600	1.25e-07	0.231027	T	217	1	14300128	14589600
6	30	GLM	MAF5	SNP	Cinnamaldehyde_R	14589600	1.25e-07	0.231027	T	217	1	14300128	14589600
2	NA	MLM	MAF5	SNP	Cinnamaldehyde_R	10542327	1.26e-07	0.231662	T	400	1	10542327	10542327
6	53	GLM	G7	SNP	Cinnamaldehyde_R	22312677	1.32e-07	0.230316	T	408	1	22312677	22388675
6	53	GLM	MAF5	SNP	Cinnamaldehyde_R	22312677	1.32e-07	0.230316	T	408	1	22312677	22388675
1	11	GLM	MAF5	SNP	Cinnamaldehyde_R	4157153	1.41e-07	0.203916	T	126	2	4157153	4157194
6	65	MLM	MAF5	SNP	Cinnamaldehyde_R	25213164	1.5e-07	0.231967	T	507	1	25201654	25545192
2	NA	MLM	MAF5	SNP	Cinnamaldehyde_R	10594076	1.55e-07	0.228954	T	402	1	10594076	10594076
2	NA	MLM	MAF5	SNP	Cinnamaldehyde_R	7658187	1.72e-07	0.227603	T	324	1	7658187	7658187
5	13	GLM	G7	SNP	Cinnamaldehyde_R	1929283	1.74e-07	0.226856	T	106	2	1903641	1992775
5	13	GLM	MAF5	SNP	Cinnamaldehyde_R	1929283	1.74e-07	0.226856	T	106	2	1903641	1992775
5	14	GLM	G7	SNP	Cinnamaldehyde_R	2054561	1.78e-07	0.226507	T	113	2	2054561	2083839
5	14	GLM	MAF5	SNP	Cinnamaldehyde_R	2054561	1.78e-07	0.226507	T	113	2	2054561	2083839
10	15	MLM	MAF5	SNP	Cinnamaldehyde_R	3593240	1.79e-07	0.226808	T	111	1	3483824	3629707
2	36	MLM	MAF5	SNP	Cinnamaldehyde_R	7529831	1.8e-07	0.227128	T	321	2	7324500	7617242
5	11	GLM	G7	SNP	Cinnamaldehyde_R	1581702	1.81e-07	0.226311	T	90	3	1579945	1800602
5	11	GLM	MAF5	SNP	Cinnamaldehyde_R	1581702	1.81e-07	0.226311	T	90	3	1579945	1800602
5	10	GLM	G7	SNP	Cinnamaldehyde_R	1465550	1.83e-07	0.226217	T	84	1	1380802	1510054
5	10	GLM	MAF5	SNP	Cinnamaldehyde_R	1465550	1.83e-07	0.226217	T	84	1	1380802	1510054
2	35	MLM	MAF5	SNP	Cinnamaldehyde_R	6709867	1.84e-07	0.226818	T	290	1	6579096	7156137
10	26	MLM	G7	SNP	Cinnamaldehyde_R	5308832	1.95e-07	0.228034	T	182	4	5153882	5419006
3	18	GLM	G7	SNP	Cinnamaldehyde_R	5293135	1.96e-07	0.225328	T	124	1	5293135	5294134
3	18	GLM	MAF5	SNP	Cinnamaldehyde_R	5293135	1.96e-07	0.225328	T	124	1	5293135	5294134
10	25	GLM	G7	SNP	Cinnamaldehyde_R	5053844	2.13e-07	0.224226	T	172	2	5047729	5053844
10	25	GLM	MAF5	SNP	Cinnamaldehyde_R	5053844	2.13e-07	0.224226	T	172	2	5047729	5053844
4	NA	GLM	G7	SNP	Cinnamaldehyde_R	27200394	2.22e-07	0.19816	T	481	1	27200394	27200394
4	NA	GLM	MAF5	SNP	Cinnamaldehyde_R	27200394	2.22e-07	0.19816	T	481	1	27200394	27200394
2	38	MLM	MAF5	SNP	Cinnamaldehyde_R	8216923	2.44e-07	0.225856	T	347	1	8216923	8236790
10	NA	GLM	G7	SNP	Cinnamaldehyde_R	3877521	2.94e-07	0.220083	T	126	1	3877521	3877521
10	NA	GLM	MAF5	SNP	Cinnamaldehyde_R	3877521	2.94e-07	0.220083	T	126	1	3877521	3877521
1	NA	GLM	MAF5	SNP	Cinnamaldehyde_R	4079457	2.98e-07	0.194365	T	120	1	4079457	4079457
1	55	GLM	NA	SSR	Cinnamaldehyde_R	26839633	3.01e-07	0.198843	T	SSR	1	26665574	26852249
10	16	GLM	G7	SNP	Cinnamaldehyde_R	3783391	3.2e-07	0.218996	T	120	1	3729667	3877487
10	16	GLM	MAF5	SNP	Cinnamaldehyde_R	3783391	3.2e-07	0.218996	T	120	1	3729667	3877487
1	60	GLM	G7	SNP	Cinnamaldehyde_R	28935828	3.22e-07	0.218917	T	551	5	28738930	29184885
1	60	GLM	MAF5	SNP	Cinnamaldehyde_R	28935828	3.22e-07	0.218917	T	551	6	28738930	29184885
9	NA	GLM	NA	SSR	Cinnamaldehyde_R	2928622	3.65e-07	0.149728	T	SSR	1	2928622	2928622
5	NA	GLM	MAF5	SNP	Cinnamaldehyde_R	20871680	3.72e-07	0.217049	T	329	1	20871680	20871680
6	65	MLM	G7	SNP	Cinnamaldehyde_R	25213164	4.22e-07	0.218488	T	507	1	25201654	25545192
1	33	GLM	G7	SNP	Cinnamaldehyde_R	10214359	4.32e-07	0.189593	T	NA	1	10017417	10670990
6	3	GLM	G7	SNP	Cinnamaldehyde_R	663825	4.39e-07	0.214913	T	21	1	663825	665967
6	3	GLM	MAF5	SNP	Cinnamaldehyde_R	663825	4.39e-07	0.214913	T	21	1	663825	665967
4	NA	GLM	G7	SNP	Cinnamaldehyde_R	21809511	4.48e-07	0.189144	T	309	1	21809511	21809511
10	28	GLM	G7	SNP	Cinnamaldehyde_R	6973545	4.48e-07	0.21465	T	195	2	6973507	6974083
4	NA	GLM	MAF5	SNP	Cinnamaldehyde_R	21809511	4.48e-07	0.189144	T	309	1	21809511	21809511
10	28	GLM	MAF5	SNP	Cinnamaldehyde_R	6973545	4.48e-07	0.21465	T	195	2	6973507	6974083
9	3	GLM	G7	SNP	Cinnamaldehyde_R	470068	4.49e-07	0.214618	T	22	2	281991	598128
9	3	GLM	MAF5	SNP	Cinnamaldehyde_R	470068	4.49e-07	0.214618	T	22	2	281991	598128
5	12	GLM	G7	SNP	Cinnamaldehyde_R	1821657	4.52e-07	0.214541	T	100	1	1821657	1830390
5	12	GLM	MAF5	SNP	Cinnamaldehyde_R	1821657	4.52e-07	0.214541	T	100	1	1821657	1830390
10	48	GLM	G7	SNP	Cinnamaldehyde_R	19623266	4.56e-07	0.214428	T	354	1	19571524	19699554
10	48	GLM	MAF5	SNP	Cinnamaldehyde_R	19623266	4.56e-07	0.214428	T	354	1	19571524	19699554
6	17	GLM	G7	SNP	Cinnamaldehyde_R	5627934	4.57e-07	0.214396	T	117	3	4280030	5627934
6	17	GLM	MAF5	SNP	Cinnamaldehyde_R	5627934	4.57e-07	0.214396	T	117	3	4280030	5627934
1	NA	GLM	MAF5	SNP	Cinnamaldehyde_R	4161748	4.59e-07	0.188841	T	129	1	4161748	4161748
10	54	GLM	G7	SNP	Cinnamaldehyde_R	21064270	5.08e-07	0.213009	T	390	1	21064270	21230086
10	54	GLM	MAF5	SNP	Cinnamaldehyde_R	21064270	5.08e-07	0.213009	T	390	2	21064270	21230086
4	34	GLM	G7	SNP	Cinnamaldehyde_R	20931977	5.35e-07	0.186852	T	NA	2	20549427	20968765
1	62	GLM	NA	SSR	Cinnamaldehyde_R	29400555	5.44e-07	0.186674	T	SSR	1	29363440	29443506
1	NA	GLM	G7	SNP	Cinnamaldehyde_R	63348	5.73e-07	0.21145	T	1	1	63348	63348
1	NA	GLM	MAF5	SNP	Cinnamaldehyde_R	63348	5.73e-07	0.21145	T	1	1	63348	63348
6	65	GLM	G7	SNP	Cinnamaldehyde_R	25355204	6.16e-07	0.210505	T	512	4	25201654	25545192
6	65	GLM	MAF5	SNP	Cinnamaldehyde_R	25355204	6.16e-07	0.210505	T	512	4	25201654	25545192
1	2	GLM	MAF5	SNP	Cinnamaldehyde_R	362072	6.23e-07	0.210354	T	15	4	311606	555162
10	NA	GLM	G7	SNP	Cinnamaldehyde_R	7205556	6.24e-07	0.210329	T	199	1	7205556	7205556
10	NA	GLM	MAF5	SNP	Cinnamaldehyde_R	7205556	6.24e-07	0.210329	T	199	1	7205556	7205556
3	43	GLM	G7	SNP	Cinnamaldehyde_R	27103677	6.45e-07	0.209901	T	396	1	27074547	27103677
3	43	GLM	MAF5	SNP	Cinnamaldehyde_R	27103677	6.45e-07	0.209901	T	396	1	27074547	27103677
4	NA	GLM	G7	SNP	Cinnamaldehyde_R	23755991	6.51e-07	0.18432	T	370	1	23755991	23755991
4	NA	GLM	MAF5	SNP	Cinnamaldehyde_R	23755991	6.51e-07	0.18432	T	370	1	23755991	23755991
4	30	GLM	G7	SNP	Cinnamaldehyde_R	17506408	6.68e-07	0.183987	T	NA	2	17372479	17880061
8	NA	GLM	G7	SNP	Cinnamaldehyde_R	9212173	6.81e-07	0.183735	T	NA	1	9212173	9212173
1	1	GLM	MAF5	SNP	Cinnamaldehyde_R	152064	7.06e-07	0.20873	T	3	1	152064	305247
10	15	MLM	G7	SNP	Cinnamaldehyde_R	3593240	7.21e-07	0.210845	T	111	1	3483824	3629707
9	48	GLM	NA	SSR	Cinnamaldehyde_R	34850257	7.26e-07	0.232933	T	SSR	1	34822895	34863253
3	41	GLM	G7	SNP	Cinnamaldehyde_R	26706759	7.35e-07	0.208196	T	374	3	26698899	26988789
3	41	GLM	MAF5	SNP	Cinnamaldehyde_R	26706759	7.35e-07	0.208196	T	374	3	26698899	26988789
10	NA	GLM	G7	SNP	Cinnamaldehyde_R	7093519	7.52e-07	0.207905	T	197	1	7093519	7093519
10	NA	GLM	MAF5	SNP	Cinnamaldehyde_R	7093519	7.52e-07	0.207905	T	197	1	7093519	7093519
3	44	GLM	G7	SNP	Cinnamaldehyde_R	27640832	7.85e-07	0.207337	T	421	7	27183974	27696466
3	44	GLM	MAF5	SNP	Cinnamaldehyde_R	27640832	7.85e-07	0.207337	T	421	7	27183974	27696466
4	32	GLM	G7	SNP	Cinnamaldehyde_R	19096508	8.64e-07	0.18065	T	NA	3	18602228	19475932
4	NA	GLM	G7	SNP	Cinnamaldehyde_R	19482917	8.64e-07	0.18065	T	261	1	19482917	19482917
4	NA	GLM	MAF5	SNP	Cinnamaldehyde_R	19482917	8.64e-07	0.18065	T	261	1	19482917	19482917
10	19	GLM	MAF5	SNP	Cinnamaldehyde_R	3974481	9.05e-07	0.205477	T	134	2	3968361	3998459
6	48	GLM	G7	SNP	Cinnamaldehyde_R	21681232	9.4e-07	0.204976	T	370	2	21681232	21681320
6	48	GLM	MAF5	SNP	Cinnamaldehyde_R	21681232	9.4e-07	0.204976	T	370	2	21681232	21681320
3	45	GLM	G7	SNP	Cinnamaldehyde_R	27742624	9.69e-07	0.204571	T	427	1	27724104	27742624
3	45	GLM	MAF5	SNP	Cinnamaldehyde_R	27742624	9.69e-07	0.204571	T	427	1	27724104	27742624
5	NA	GLM	G7	SNP	Cinnamaldehyde_R	30293820	1e-06	0.204133	T	507	1	30293820	30293820
5	NA	GLM	MAF5	SNP	Cinnamaldehyde_R	30293820	1e-06	0.204133	T	507	1	30293820	30293820
4	NA	GLM	G7	SNP	Cinnamaldehyde_R	23708562	1.07e-06	0.177903	T	368	1	23708562	23708562
4	NA	GLM	MAF5	SNP	Cinnamaldehyde_R	23708562	1.07e-06	0.177903	T	368	1	23708562	23708562
4	NA	GLM	G7	SNP	Cinnamaldehyde_R	20130756	1.12e-06	0.177237	T	268	1	20130756	20130756
4	NA	GLM	MAF5	SNP	Cinnamaldehyde_R	20130756	1.12e-06	0.177237	T	268	1	20130756	20130756
9	43	GLM	NA	SSR	Cinnamaldehyde_R	32460654	1.17e-06	0.184817	T	SSR	1	31280541	32524790
5	11	GLM	NA	SSR	Cinnamaldehyde_R	1778793	1.2e-06	0.195172	T	SSR	1	1579945	1800602
1	NA	MLM	MAF5	SNP	Cinnamaldehyde_R	17867362	1.21e-06	0.204738	T	436	1	17867362	17867362
9	1	GLM	G7	SNP	Cinnamaldehyde_R	197564	1.23e-06	0.201448	T	5	2	193506	197564
9	1	GLM	MAF5	SNP	Cinnamaldehyde_R	197564	1.23e-06	0.201448	T	5	2	193506	197564
4	NA	GLM	G7	SNP	Cinnamaldehyde_R	533673	1.34e-06	0.174947	T	NA	1	533673	533673
1	NA	GLM	G7	SNP	Cinnamaldehyde_R	19454130	1.45e-06	0.199238	T	450	1	19454130	19454130
1	NA	GLM	MAF5	SNP	Cinnamaldehyde_R	19454130	1.45e-06	0.199238	T	450	1	19454130	19454130
10	54	GLM	G7	SNP	Cinnamaldehyde_R	21218228	1.46e-06	0.199148	T	395	1	21064270	21230086
1	3	GLM	MAF5	SNP	Cinnamaldehyde_R	606037	1.54e-06	0.198476	T	23	2	588709	750219
1	6	GLM	MAF5	SNP	Cinnamaldehyde_R	2793273	1.56e-06	0.198278	T	79	1	2678044	2829157
4	31	GLM	G7	SNP	Cinnamaldehyde_R	18243498	1.59e-06	0.172703	T	NA	2	18092826	18412084
3	NA	GLM	MAF5	SNP	Cinnamaldehyde_R	31090298	1.65e-06	0.197559	T	569	1	31090298	31090298
4	29	GLM	G7	SNP	Cinnamaldehyde_R	16931481	1.74e-06	0.171517	T	NA	2	16424392	16978546
1	NA	MLM	G7	SNP	Cinnamaldehyde_R	17867362	2e-06	0.197861	T	436	1	17867362	17867362
9	39	GLM	G7	SNP	Cinnamaldehyde_R	29494939	2.03e-06	0.169485	T	NA	1	29482232	29721171
1	NA	GLM	G7	SNP	Cinnamaldehyde_R	27734798	2.18e-06	0.193813	T	521	1	27734798	27734798
1	NA	GLM	MAF5	SNP	Cinnamaldehyde_R	27734798	2.18e-06	0.193813	T	521	1	27734798	27734798
9	4	GLM	G7	SNP	Cinnamaldehyde_R	749395	2.21e-06	0.193648	T	31	3	713588	857818
4	63	GLM	G7	SNP	Cinnamaldehyde_R	28667300	2.24e-06	0.19346	T	556	1	28667290	28667300
6	NA	GLM	G7	SNP	Cinnamaldehyde_R	13612079	2.24e-06	0.193455	T	206	1	13612079	13612079
4	63	GLM	MAF5	SNP	Cinnamaldehyde_R	28667300	2.24e-06	0.19346	T	556	2	28667290	28667300
6	NA	GLM	MAF5	SNP	Cinnamaldehyde_R	13612079	2.24e-06	0.193455	T	206	1	13612079	13612079
7	10	GLM	G7	SNP	Cinnamaldehyde_R	2242800	2.26e-06	0.193345	T	109	3	2242800	2399463
7	10	GLM	MAF5	SNP	Cinnamaldehyde_R	2242856	2.26e-06	0.193345	T	110	3	2242800	2399463
3	NA	GLM	G7	SNP	Cinnamaldehyde_R	27916847	2.37e-06	0.192701	T	438	1	27916847	27916847
3	NA	GLM	MAF5	SNP	Cinnamaldehyde_R	27916847	2.37e-06	0.192701	T	438	1	27916847	27916847
10	NA	GLM	G7	SNP	Cinnamaldehyde_R	4899660	2.43e-06	0.192406	T	168	1	4899660	4899660
10	NA	GLM	MAF5	SNP	Cinnamaldehyde_R	4899660	2.43e-06	0.192406	T	168	1	4899660	4899660
5	77	GLM	G7	SNP	Cinnamaldehyde_R	36361657	2.48e-06	0.166853	T	NA	1	36299101	36438628
3	74	GLM	G7	SNP	Cinnamaldehyde_R	36235781	2.52e-06	0.191885	T	773	3	35942553	36345866
3	74	GLM	MAF5	SNP	Cinnamaldehyde_R	36235781	2.52e-06	0.191885	T	773	1	35942553	36345866
6	NA	GLM	G7	SNP	Cinnamaldehyde_R	8111769	2.66e-06	0.19119	T	152	1	8111769	8111769
6	NA	GLM	MAF5	SNP	Cinnamaldehyde_R	8111769	2.66e-06	0.19119	T	152	1	8111769	8111769
9	42	GLM	NA	SSR	Cinnamaldehyde_R	31792604	2.67e-06	0.179151	T	SSR	1	30733060	30912541
6	68	GLM	G7	SNP	Cinnamaldehyde_R	26051844	2.71e-06	0.190914	T	541	6	25801401	26051844
6	68	GLM	MAF5	SNP	Cinnamaldehyde_R	26051844	2.71e-06	0.190914	T	541	5	25801401	26051844
1	NA	GLM	G7	SNP	Cinnamaldehyde_R	7974966	2.8e-06	0.190509	T	251	1	7974966	7974966
1	NA	GLM	MAF5	SNP	Cinnamaldehyde_R	7974966	2.8e-06	0.190509	T	251	1	7974966	7974966
3	48	GLM	G7	SNP	Cinnamaldehyde_R	28249991	2.81e-06	0.190439	T	447	1	27982157	28410173
3	48	GLM	MAF5	SNP	Cinnamaldehyde_R	28249991	2.81e-06	0.190439	T	447	1	27982157	28410173
3	55	MLM	MAF5	SNP	Cinnamaldehyde_R	30721403	2.84e-06	0.191437	T	549	5	30271279	30948946
2	34	GLM	G7	SNP	Cinnamaldehyde_R	6539098	2.96e-06	0.189756	T	279	2	6444089	6563390
2	34	GLM	MAF5	SNP	Cinnamaldehyde_R	6539098	2.96e-06	0.189756	T	279	2	6444089	6563390
4	NA	GLM	MAF5	SNP	Cinnamaldehyde_R	18499742	3e-06	0.164353	T	245	1	18499742	18499742
3	47	GLM	G7	SNP	Cinnamaldehyde_R	27830310	3.11e-06	0.18909	T	434	1	27817879	27832169
3	47	GLM	MAF5	SNP	Cinnamaldehyde_R	27830310	3.11e-06	0.18909	T	434	1	27817879	27832169
4	NA	GLM	G7	SNP	Cinnamaldehyde_R	18582271	3.23e-06	0.163371	T	NA	1	18582271	18582271
3	NA	GLM	G7	SNP	Cinnamaldehyde_R	26371328	3.26e-06	0.188469	T	349	1	26371328	26371328
3	NA	GLM	MAF5	SNP	Cinnamaldehyde_R	26371328	3.26e-06	0.188469	T	349	1	26371328	26371328
3	NA	MLM	MAF5	SNP	Cinnamaldehyde_R	31150156	3.33e-06	0.189336	T	571	1	31150156	31150156
2	37	GLM	G7	SNP	Cinnamaldehyde_R	7854917	3.36e-06	0.188052	T	331	3	7812200	8143718
9	6	GLM	G7	SNP	Cinnamaldehyde_R	1109358	3.48e-06	0.18757	T	44	1	1109358	1233013
5	NA	GLM	G7	SNP	Cinnamaldehyde_R	2360992	3.78e-06	0.186471	T	130	1	2360992	2360992
5	NA	GLM	MAF5	SNP	Cinnamaldehyde_R	2360992	3.78e-06	0.186471	T	130	1	2360992	2360992
5	15	GLM	G7	SNP	Cinnamaldehyde_R	2293184	3.84e-06	0.186253	T	125	2	2090123	2293184
5	15	GLM	MAF5	SNP	Cinnamaldehyde_R	2293184	3.84e-06	0.186253	T	125	2	2090123	2293184
4	NA	GLM	G7	SNP	Cinnamaldehyde_R	27503101	3.89e-06	0.186098	T	503	1	27503101	27503101
4	NA	GLM	MAF5	SNP	Cinnamaldehyde_R	27503101	3.89e-06	0.186098	T	503	1	27503101	27503101
4	32	GLM	MAF5	SNP	Cinnamaldehyde_R	19096452	3.93e-06	0.160779	T	254	1	18602228	19475932
3	58	GLM	NA	SSR	Cinnamaldehyde_R	31467996	3.99e-06	0.201031	T	SSR	1	31426718	31564785
3	69	GLM	G7	SNP	Cinnamaldehyde_R	35677728	4.05e-06	0.160369	T	NA	1	35617075	35720227
1	74	GLM	G7	SNP	Cinnamaldehyde_R	32858563	4.1e-06	0.16022	T	685	2	32850063	32858563
1	74	GLM	MAF5	SNP	Cinnamaldehyde_R	32858563	4.1e-06	0.16022	T	685	2	32850063	32858563
10	34	GLM	G7	SNP	Cinnamaldehyde_R	12273487	4.13e-06	0.185273	T	247	1	12273487	12273493
10	34	GLM	MAF5	SNP	Cinnamaldehyde_R	12273487	4.13e-06	0.185273	T	247	1	12273487	12273493
6	NA	GLM	G7	SNP	Cinnamaldehyde_R	26244041	4.22e-06	0.184977	T	544	1	26244041	26244041
6	NA	GLM	MAF5	SNP	Cinnamaldehyde_R	26244041	4.22e-06	0.184977	T	544	1	26244041	26244041
10	NA	GLM	G7	SNP	Cinnamaldehyde_R	5605104	4.27e-06	0.184835	T	185	1	5605104	5605104
10	NA	GLM	MAF5	SNP	Cinnamaldehyde_R	5605104	4.27e-06	0.184835	T	185	1	5605104	5605104
9	NA	GLM	G7	SNP	Cinnamaldehyde_R	34956250	4.41e-06	0.184384	T	588	1	34956250	34956250
9	NA	GLM	MAF5	SNP	Cinnamaldehyde_R	34956250	4.41e-06	0.184384	T	588	1	34956250	34956250
6	67	GLM	G7	SNP	Cinnamaldehyde_R	25664581	4.99e-06	0.182737	T	525	1	25640726	25664581
6	67	GLM	MAF5	SNP	Cinnamaldehyde_R	25664581	4.99e-06	0.182737	T	525	1	25640726	25664581
11	NA	GLM	G7	SNP	Cinnamaldehyde_R	29217	5.01e-06	0.182669	T	NA	1	29217	29217
11	NA	GLM	MAF5	SNP	Cinnamaldehyde_R	29217	5.01e-06	0.182669	T	NA	1	29217	29217
6	12	GLM	G7	SNP	Cinnamaldehyde_R	3694223	5.34e-06	0.181813	T	89	2	3694223	3695547
6	12	GLM	MAF5	SNP	Cinnamaldehyde_R	3694223	5.34e-06	0.181813	T	89	2	3694223	3695547
4	NA	GLM	NA	SSR	Cinnamaldehyde_R	31631	5.45e-06	0.143911	T	SSR	1	31631	31631
2	35	GLM	G7	SNP	Cinnamaldehyde_R	6790635	5.53e-06	0.181345	T	293	2	6579096	7156137
4	NA	GLM	G7	SNP	Cinnamaldehyde_R	17882870	5.55e-06	0.156214	T	240	1	17882870	17882870
4	NA	GLM	MAF5	SNP	Cinnamaldehyde_R	17882870	5.55e-06	0.156214	T	240	1	17882870	17882870
7	27	GLM	G7	SNP	Cinnamaldehyde_R	6410151	5.7e-06	0.180933	T	245	2	6128106	6410151
7	27	GLM	MAF5	SNP	Cinnamaldehyde_R	6410151	5.7e-06	0.180933	T	245	2	6128106	6410151
1	NA	GLM	G7	SNP	Cinnamaldehyde_R	803695	5.87e-06	0.180522	T	29	1	803695	803695
1	NA	GLM	MAF5	SNP	Cinnamaldehyde_R	803695	5.87e-06	0.180522	T	29	1	803695	803695
1	56	MLM	MAF5	SNP	Cinnamaldehyde_R	27743259	6.32e-06	0.180715	T	522	1	27743259	27743274
9	NA	GLM	G7	SNP	Cinnamaldehyde_R	649613	6.57e-06	0.179015	T	25	1	649613	649613
9	NA	GLM	MAF5	SNP	Cinnamaldehyde_R	649613	6.57e-06	0.179015	T	25	1	649613	649613
6	19	GLM	G7	SNP	Cinnamaldehyde_R	6124874	6.98e-06	0.178176	T	126	1	6116647	6124874
6	19	GLM	MAF5	SNP	Cinnamaldehyde_R	6124874	6.98e-06	0.178176	T	126	1	6116647	6124874
7	2	GLM	G7	SNP	Cinnamaldehyde_R	421432	6.99e-06	0.153129	T	17	1	196804	747529
7	2	GLM	MAF5	SNP	Cinnamaldehyde_R	421432	6.99e-06	0.153129	T	17	1	196804	747529
9	NA	GLM	G7	SNP	Cinnamaldehyde_R	2960396	7.13e-06	0.152876	T	NA	1	2960396	2960396
9	NA	GLM	G7	SNP	Cinnamaldehyde_R	2973754	7.13e-06	0.152876	T	NA	1	2973754	2973754
9	NA	GLM	G7	SNP	Cinnamaldehyde_R	3022362	7.13e-06	0.152876	T	NA	1	3022362	3022362
9	NA	GLM	G7	SNP	Cinnamaldehyde_R	3100152	7.13e-06	0.152876	T	NA	1	3100152	3100152
9	NA	GLM	G7	SNP	Cinnamaldehyde_R	3119045	7.13e-06	0.152876	T	NA	1	3119045	3119045
6	14	GLM	G7	SNP	Cinnamaldehyde_R	3794104	7.18e-06	0.177794	T	94	1	3784683	3794104
6	14	GLM	MAF5	SNP	Cinnamaldehyde_R	3794104	7.18e-06	0.177794	T	94	1	3784683	3794104
7	NA	GLM	G7	SNP	Cinnamaldehyde_R	2470089	7.55e-06	0.177121	T	116	1	2470089	2470089
7	NA	GLM	MAF5	SNP	Cinnamaldehyde_R	2470089	7.55e-06	0.177121	T	116	1	2470089	2470089
3	53	GLM	G7	SNP	Cinnamaldehyde_R	29967412	7.58e-06	0.177065	T	511	1	29967412	29974947
3	53	GLM	MAF5	SNP	Cinnamaldehyde_R	29967412	7.58e-06	0.177065	T	511	1	29967412	29974947
6	NA	GLM	G7	SNP	Cinnamaldehyde_R	9409122	7.62e-06	0.176997	T	162	1	9409122	9409122
6	NA	GLM	MAF5	SNP	Cinnamaldehyde_R	9409122	7.62e-06	0.176997	T	162	1	9409122	9409122
9	26	GLM	NA	SSR	Cinnamaldehyde_R	9827809	7.67e-06	0.141845	T	SSR	1	7670506	10934281
6	NA	GLM	G7	SNP	Cinnamaldehyde_R	26197294	7.95e-06	0.176412	T	543	1	26197294	26197294
6	NA	GLM	MAF5	SNP	Cinnamaldehyde_R	26197294	7.95e-06	0.176412	T	543	1	26197294	26197294
2	57	MLM	G7	SNP	Cinnamaldehyde_R	27852246	8.16e-06	0.178731	T	548	1	27852246	29867634
4	65	GLM	G7	SNP	Cinnamaldehyde_R	29415667	8.51e-06	0.150504	T	NA	7	28951105	29493076
4	NA	GLM	G7	SNP	Cinnamaldehyde_R	29606263	8.51e-06	0.150504	T	NA	1	29606263	29606263
6	21	GLM	G7	SNP	Cinnamaldehyde_R	8430093	8.68e-06	0.175221	T	156	2	8357240	8430146
6	21	GLM	MAF5	SNP	Cinnamaldehyde_R	8430093	8.68e-06	0.175221	T	156	2	8357240	8430146
4	34	GLM	MAF5	SNP	Cinnamaldehyde_R	20686727	8.75e-06	0.15014	T	272	1	20549427	20968765
10	NA	GLM	G7	SNP	Cinnamaldehyde_R	4130984	8.92e-06	0.174842	T	145	1	4130984	4130984
10	NA	GLM	MAF5	SNP	Cinnamaldehyde_R	4130984	8.92e-06	0.174842	T	145	1	4130984	4130984
5	20	GLM	G7	SNP	Cinnamaldehyde_R	2732709	9.14e-06	0.174519	T	147	1	2674400	3039540
7	24	GLM	G7	SNP	Cinnamaldehyde_R	5641169	9.14e-06	0.174515	T	221	1	5596523	5648293
5	20	GLM	MAF5	SNP	Cinnamaldehyde_R	2732709	9.14e-06	0.174519	T	147	1	2674400	3039540
7	24	GLM	MAF5	SNP	Cinnamaldehyde_R	5641169	9.14e-06	0.174515	T	221	1	5596523	5648293
7	13	GLM	G7	SNP	Cinnamaldehyde_R	3095657	9.21e-06	0.174403	T	138	3	2975385	3095657
7	13	GLM	MAF5	SNP	Cinnamaldehyde_R	3095657	9.21e-06	0.174403	T	138	2	2975385	3095657
1	26	MLM	G7	SNP	Cinnamaldehyde_R	7426459	9.57e-06	0.176268	T	237	2	6834165	7942921
2	3	GLM	G7	SNP	Cinnamaldehyde_R	172484	9.68e-06	0.173726	T	15	1	112310	172484
2	3	GLM	MAF5	SNP	Cinnamaldehyde_R	172484	9.68e-06	0.173726	T	15	1	112310	172484
6	NA	GLM	G7	SNP	Cinnamaldehyde_R	9495499	9.77e-06	0.173604	T	165	1	9495499	9495499
6	NA	GLM	MAF5	SNP	Cinnamaldehyde_R	9495499	9.77e-06	0.173604	T	165	1	9495499	9495499
10	NA	GLM	G7	SNP	Cinnamaldehyde_R	10005618	1e-05	0.173258	T	224	1	10005618	10005618
10	NA	GLM	MAF5	SNP	Cinnamaldehyde_R	10005618	1e-05	0.173258	T	224	1	10005618	10005618
6	11	GLM	G7	SNP	Cinnamaldehyde_R	3359259	1.03e-05	0.172933	T	85	1	2924244	3597266
6	11	GLM	MAF5	SNP	Cinnamaldehyde_R	3359259	1.03e-05	0.172933	T	85	1	2924244	3597266
4	15	GLM	G7	SNP	Cinnamaldehyde_R	2273913	1.05e-05	0.147702	T	88	1	2185715	2410816
4	15	GLM	MAF5	SNP	Cinnamaldehyde_R	2273913	1.05e-05	0.147702	T	88	1	2185715	2410816
1	62	GLM	G7	SNP	Cinnamaldehyde_R	29398764	1.1e-05	0.171975	T	561	1	29363440	29443506
1	62	GLM	MAF5	SNP	Cinnamaldehyde_R	29398764	1.1e-05	0.171975	T	561	1	29363440	29443506
2	36	GLM	G7	SNP	Cinnamaldehyde_R	7324500	1.15e-05	0.171345	T	313	1	7324500	7617242
4	73	MLM	G7	SNP	Cinnamaldehyde_R	31366881	1.21e-05	0.147813	T	NA	1	31245987	31391851
4	74	MLM	G7	SNP	Cinnamaldehyde_R	31743138	1.21e-05	0.147813	T	NA	1	31640263	31862741
9	12	GLM	G7	SNP	Cinnamaldehyde_R	2704658	1.22e-05	0.145683	T	NA	2	2482674	2713405
9	NA	GLM	G7	SNP	Cinnamaldehyde_R	3007253	1.22e-05	0.145683	T	NA	1	3007253	3007253
4	42	GLM	G7	SNP	Cinnamaldehyde_R	23857927	1.27e-05	0.170027	T	374	1	23857927	23997774
4	42	GLM	MAF5	SNP	Cinnamaldehyde_R	23857927	1.27e-05	0.170027	T	374	1	23857927	23997774
9	45	GLM	G7	SNP	Cinnamaldehyde_R	33485374	1.29e-05	0.169819	T	547	1	33378502	33485374
9	45	GLM	MAF5	SNP	Cinnamaldehyde_R	33485374	1.29e-05	0.169819	T	547	1	33378502	33485374
3	51	GLM	G7	SNP	Cinnamaldehyde_R	29658860	1.32e-05	0.169498	T	493	1	29479613	29720600
3	51	GLM	MAF5	SNP	Cinnamaldehyde_R	29658860	1.32e-05	0.169498	T	493	1	29479613	29720600
9	27	GLM	NA	SSR	Cinnamaldehyde_R	11381879	1.33e-05	0.137342	T	SSR	1	11208535	12691180
3	NA	GLM	G7	SNP	Cinnamaldehyde_R	26309551	1.37e-05	0.168929	T	345	1	26309551	26309551
3	NA	GLM	MAF5	SNP	Cinnamaldehyde_R	26309551	1.37e-05	0.168929	T	345	1	26309551	26309551
10	NA	GLM	G7	SNP	Cinnamaldehyde_R	9110576	1.4e-05	0.168696	T	215	1	9110576	9110576
10	NA	GLM	MAF5	SNP	Cinnamaldehyde_R	9110576	1.4e-05	0.168696	T	215	1	9110576	9110576
3	NA	GLM	G7	SNP	Cinnamaldehyde_R	26614475	1.49e-05	0.167793	T	364	1	26614475	26614475
3	NA	GLM	MAF5	SNP	Cinnamaldehyde_R	26614475	1.49e-05	0.167793	T	364	1	26614475	26614475
2	13	GLM	NA	SSR	Cinnamaldehyde_R	1067092	1.49e-05	0.19016	T	SSR	1	1065901	1181828
3	NA	GLM	G7	SNP	Cinnamaldehyde_R	27106193	1.5e-05	0.167738	T	397	1	27106193	27106193
3	NA	GLM	MAF5	SNP	Cinnamaldehyde_R	27106193	1.5e-05	0.167738	T	397	1	27106193	27106193
4	65	GLM	MAF5	SNP	Cinnamaldehyde_R	29385040	1.52e-05	0.167569	T	581	1	28951105	29493076
6	NA	GLM	NA	SSR	Cinnamaldehyde_R	20474742	1.54e-05	0.118231	T	SSR	1	20474742	20474742
7	NA	GLM	G7	SNP	Cinnamaldehyde_R	4000703	1.56e-05	0.167216	T	158	1	4000703	4000703
9	46	GLM	G7	SNP	Cinnamaldehyde_R	33976125	1.56e-05	0.167158	T	552	1	33870145	33976125
7	NA	GLM	MAF5	SNP	Cinnamaldehyde_R	4000703	1.56e-05	0.167216	T	158	1	4000703	4000703
9	46	GLM	MAF5	SNP	Cinnamaldehyde_R	33976125	1.56e-05	0.167158	T	552	1	33870145	33976125
7	28	GLM	G7	SNP	Cinnamaldehyde_R	6537731	1.61e-05	0.166714	T	248	1	6535097	7472668
2	41	GLM	G7	SNP	Cinnamaldehyde_R	8558105	1.64e-05	0.166535	T	369	1	8526440	8616441
7	NA	GLM	G7	SNP	Cinnamaldehyde_R	2892560	1.66e-05	0.166333	T	125	1	2892560	2892560
7	NA	GLM	G7	SNP	Cinnamaldehyde_R	5595768	1.69e-05	0.166097	T	218	1	5595768	5595768
2	NA	MLM	G7	SNP	Cinnamaldehyde_R	35313083	1.69e-05	0.16867	T	648	1	35313083	35313083
6	60	GLM	G7	SNP	Cinnamaldehyde_R	23466160	1.73e-05	0.165759	T	458	1	23432637	23531966
10	NA	GLM	G7	SNP	Cinnamaldehyde_R	8692236	1.78e-05	0.165334	T	212	1	8692236	8692236
6	15	GLM	G7	SNP	Cinnamaldehyde_R	4170640	1.8e-05	0.165243	T	96	1	4170640	4249705
3	NA	GLM	G7	SNP	Cinnamaldehyde_R	27939813	1.83e-05	0.165024	T	441	1	27939813	27939813
1	NA	GLM	G7	SNP	Cinnamaldehyde_R	19154670	1.95e-05	0.16409	T	448	1	19154670	19154670
10	49	GLM	G7	SNP	Cinnamaldehyde_R	19707392	1.98e-05	0.163876	T	360	1	19707392	19707954
5	19	MLM	G7	SNP	Cinnamaldehyde_R	2579090	1.99e-05	0.166374	T	141	1	2575265	2649413
4	71	GLM	NA	SSR	Cinnamaldehyde_R	30586208	2.18e-05	0.152237	T	SSR	1	30406710	30965982
8	6	GLM	NA	SSR	Cinnamaldehyde_R	2251806	2.23e-05	0.16643	T	SSR	1	2021946	2268116
9	25	GLM	NA	SSR	Cinnamaldehyde_R	7596341	2.9e-05	0.140505	T	SSR	1	7542185	7622307
7	28	GLM	NA	SSR	Cinnamaldehyde_R	6563143	2.92e-05	0.126804	T	SSR	1	6535097	7472668
9	NA	GLM	NA	SSR	Cinnamaldehyde_R	30153372	3.36e-05	0.148452	T	SSR	1	30153372	30153372
9	NA	GLM	NA	SSR	Cinnamaldehyde_R	13510011	3.46e-05	0.126429	T	SSR	1	13510011	13510011
5	NA	GLM	NA	SSR	Cinnamaldehyde_R	405176	4.25e-05	0.124825	T	SSR	1	405176	405176
7	27	GLM	NA	SSR	Cinnamaldehyde_R	6181185	8.12e-05	0.142154	T	SSR	1	6128106	6410151
4	NA	GLM	NA	SSR	Cinnamaldehyde_R	2459160	0.000106	0.0932141	T	SSR	1	2459160	2459160
9	NA	GLM	NA	SSR	Cinnamaldehyde_R	6355360	0.000145	0.13208	T	SSR	1	6355360	6355360
6	NA	GLM	NA	SSR	Cinnamaldehyde_R	23397374	0.000181	0.0867573	T	SSR	1	23397374	23397374
1	NA	GLM	NA	SSR	Cinnamaldehyde_R	4938891	0.000237	0.123422	T	SSR	1	4938891	4938891
3	NA	GLM	NA	SSR	Cinnamaldehyde_R	20494339	0.000258	0.140282	T	SSR	1	20494339	20494339
