# Supplementary material for: Two Main Biosynthesis Pathways Involved in the Synthesis of the Floral Aroma of the Nacional Cocoa Variety
Source: Front Plant Sci. 2021 Sep 24;12:681979. doi: 10.3389/fpls.2021.681979 (PMC8498224; doi:10.3389/fpls.2021.681979)
Supplement: Supplementary file 3 [file Table_3.XLSX]

## Sheet: Feuil1
N° of the association	Pathway	CHR	Gene position	Gene function	Trait in association	N° of the gene	Haplotypic bloc number	Start of haplotypic bloc	End of haplotypic bloc	Position of the pic of association
1	T	1	1 883 959	Geranylgeranyl pyrophosphate synthase%2C chloroplastic	Epoxylinalool (R)	Tc01v2_g003630	4	805 132	2 445 782	2 368 915
2	T	1	3 173 783	Cytochrome P450 81E8	Epoxylinalool (R) ,floral note light wood	Tc01v2_g005720	7	3 083 032	3 398 183	3 379 361
2	T	1	3 179 883	Cytochrome P450 81E8	Epoxylinalool (R) ,floral note light wood	Tc01v2_g005740	7	3 083 032	3 398 183	3 379 361
3	T	1	6 026 043	Cytochrome P450 78A7	epoxylinalool (R)	Tc01v2_g009700	21	5 940 526	6 204 028	6 130 253
4	T	2	7 549 475	Dehydrodolichyl diphosphate synthase 6	cis ocimene co-eluted with ethyl hexanoate_UR and floral perfume	Tc02v2_g012080	36	7324500	7617242	7 324 500
4	T	2	7 551 259	Dehydrodolichyl diphosphate synthase 6	cis ocimene co-eluted with ethyl hexanoate_UR and floral perfume	Tc02v2_g012090	36	7324500	7617242	7 324 500
4	T	2	7 553 795	Dehydrodolichyl diphosphate synthase 6	cis ocimene co-eluted with ethyl hexanoate_UR and floral perfume	Tc02v2_g012100	36	7324500	7617242	7 324 500
4	T	2	7 572 073	Putative Dehydrodolichyl diphosphate synthase 6	cis ocimene co-eluted with ethyl hexanoate_UR and floral perfume	Tc02v2_g012120	36	7324500	7617242	7 324 500
5	T	2	8 257 841	Probable 3-hydroxyisobutyryl-CoA hydrolase 2	linalool cis pyranic oxide (UR)	Tc02v2_g013120	39	8239972	8416672	8 389 914
6	T, L-Phe	5	32 749 861	Cytochrome P450 89A2	linalool (UR) and linalool trans furanic oxide (UR) ; 2-phenylethanol (UR)	Tc05v2_g018720	64	32660102	33718239	33 303 465
6	T, L-Phe	5	33 057 632	Cytochrome P450 89A9	linalool (UR) and linalool trans furanic oxide (UR) ; 2-phenylethanol (UR)	Tc05v2_g018860	64	32660102	33718239	33 303 465
6	T, L-Phe	5	33 064 477	Cytochrome P450 89A2	linalool (UR) and linalool trans furanic oxide (UR) ; 2-phenylethanol (UR)	Tc05v2_g018880	64	32660102	33718239	33 303 465
6	T, L-Phe	5	33 073 996	Cytochrome P450 89A2	linalool (UR) and linalool trans furanic oxide (UR) ; 2-phenylethanol (UR)	Tc05v2_g018890	64	32660102	33718239	33 303 465
6	T, L-Phe	5	33 094 200	Cytochrome P450 89A2	linalool (UR) and linalool trans furanic oxide (UR) ; 2-phenylethanol (UR)	Tc05v2_g018920	64	32660102	33718239	33 303 465
6	T, L-Phe	5	33 099 009	Cytochrome P450 89A2	linalool (UR) and linalool trans furanic oxide (UR) ; 2-phenylethanol (UR)	Tc05v2_g018940	64	32660102	33718239	33 303 465
7	T	7	6 346 577	Putative Probable terpene synthase 9	linalool cis pyranic oxide_UR	Tc07v2_g008720	27	6128106	6410151	6 181 185
7	T	7	6 365 007	Probable terpene synthase 9	linalool cis pyranic oxide_UR	Tc07v2_g008730	27	6128106	6410151	6 181 185
7	T	7	6 380 614	Putative Probable terpene synthase 9	linalool cis pyranic oxide_UR	Tc07v2_g008740	27	6128106	6410151	6 181 185
8	T	9	791 968	3-hydroxyisobutyryl-CoA hydrolase-like protein 2%2C mitochondrial	epoxylinalool (R)	Tc09v2_g001390	4	713588	857818	749 365
9	T	10	6 317 543	Probable terpene synthase 9	linalool cis pyranic oxide (UR)	Tc10v2_g007800	27	6023982	6718126	6 167 221
10	L-Phe	1	1 102 658	Aldehyde dehydrogenase family 3 member F1	1-phenylethyl acetate (R), benzaldehyde (R) and cinnamaldehyde (R)	Tc01v2_g002130	4	805 132	2 445 782	2 430 002
11	L-Phe	1	3 107 999	Probable cinnamyl alcohol dehydrogenase 7/8	1-phenylethyl acetate (R), phenylethyl acetate co-eluted with 2-ethylphenol (R), acetophenone (R), benzaldehyde (R), cinnamaldehyde (R) and the floral note light wood	Tc01v2_g005590	7	3083032	3398183	3 379 361
11	L-Phe	1	3 112 047	Probable cinnamyl alcohol dehydrogenase	1-phenylethyl acetate (R), phenylethyl acetate co-eluted with 2-ethylphenol (R), acetophenone (R), benzaldehyde (R), cinnamaldehyde (R) and the floral note light wood	Tc01v2_g005600	7	3083032	3398183	3 379 361
12	L-Phe	1	6 039 217	Shikimate kinase 1%2C chloroplastic	1-phenylethyl acetate (R) and cinnamaldehyde (R)	Tc01v2_g009720	21	5 940 526	6 204 028	5 940 526
13	L-Phe	1	7 124 110	Alcohol dehydrogenase 1	1-phenylethyl acetate (R), phenylethyl acetate co-eluted with 2-ethylphenol (R), acetophenone (R), benzaldehyde (R) and cinnamaldehyde (R),	Tc01v2_g010950	26	6 834 165	7 942 921	6 855 567
13	L-Phe	1	7 131 266	Alcohol dehydrogenase 1	1-phenylethyl acetate (R), phenylethyl acetate co-eluted with 2-ethylphenol (R), acetophenone (R), benzaldehyde (R) and cinnamaldehyde (R),	Tc01v2_g010970	26	6 834 165	7 942 921	6 855 567
14	L-Phe	2	7 436 835	Aminotransferase ALD1	acetophenone (NT and R), benzaldehyde (R), benzyl alcohol (UR), cinnamaldehyde (R) and the floral perfume note	Tc02v2_g011910	36	7324500	7617242	7 453 377
15	L-Phe	4	22 566 348	Acetyltransferase NSI	1-phenylethyl acetate and cinnamaldehyde (R)	Tc04v2_g011910	38	22435678	22617119	22 503 297
16	L-Phe	4	26 741 963	3-ketoacyl-CoA thiolase 2%2C peroxisomal	1-phenylethyl acetate (R)	Tc04v2_g017110	51	26703951	27146370	26 876 494
16	L-phe	4	26 715 852	Chalcone synthase 2	1-phenylethyl acetate (R)	Tc04v2_g017080	51	26703951	27146370	26 876 494
17	L-Phe	4	27 604 955	2-hydroxyisoflavanone dehydratase	floral perfume	Tc04v2_g018500	55	27507597	27608727	27 507 597
17	L-Phe	4	27 608 704	2-hydroxyisoflavanone dehydratase	floral perfume	Tc04v2_g018510	55	27507597	27608727	27 507 597
18	L-Phe	4	28 270 492	Probable aldo-keto reductase 1	1-phenylethyl acetate (R)	Tc04v2_g019560	60	28257730	28352788	28 285 175
19	L-Phe	5	1 328 453	Aldehyde oxidase GLOX	4-hydroxy acetophenone (UR), acetophenone (UR) and benzyl acetate (UR)	Tc05v2_g002590	9	1326444	1374494	1 353 636
20	L-Phe	5	1 431 497	Aldo-keto reductase family 4 member C9	4-hydroxy acetophenone (UR), acetophenone (UR), benzyl acetate (UR) and cinnamaldehyde (R)	Tc05v2_g002800	10	1380802	1510054	1 380 802
20	L-Phe	5	1 435 043	Aldo-keto reductase family 4 member C9	4-hydroxy acetophenone (UR), acetophenone (UR), benzyl acetate (UR) and cinnamaldehyde (R)	Tc05v2_g002810	10	1380802	1510054	1 380 802
20	L-Phe	5	1 438 324	Aldo-keto reductase family 4 member C9	4-hydroxy acetophenone (UR), acetophenone (UR), benzyl acetate (UR) and cinnamaldehyde (R)	Tc05v2_g002820	10	1380802	1510054	1 380 802
20	L-Phe	5	1 441 067	Aldo-keto reductase family 4 member C9	4-hydroxy acetophenone (UR), acetophenone (UR), benzyl acetate (UR) and cinnamaldehyde (R)	Tc05v2_g002830	10	1380802	1510054	1 380 802
20	L-Phe	5	1 444 916	Aldo-keto reductase family 4 member C8	4-hydroxy acetophenone (UR), acetophenone (UR), benzyl acetate (UR) and cinnamaldehyde (R)	Tc05v2_g002840	10	1380802	1510054	1 380 802
20	L-Phe	5	1 450 213	Aldo-keto reductase family 4 member C8	4-hydroxy acetophenone (UR), acetophenone (UR), benzyl acetate (UR) and cinnamaldehyde (R)	Tc05v2_g002850	10	1380802	1510054	1 380 802
21	L-Phe	5	2 978 188	Phenylalanine ammonia-lyase	cinnamaldehyde (R)	Tc05v2_g005360	20	2674400	3039540	2 732 709
22	L-Phe	5	30 446 215	Alcohol dehydrogenase-like 6	benzaldehyde (R)	Tc05v2_g016390	56	30407214	30473075	30 471 918
23	L-Phe	7	2 055 963	GDSL esterase/lipase At1g28570	4-hydroxy acetophenone (UR), acetophenone (UR) and benzyl acetate (UR)	Tc07v2_g003340	9	1894664	2092063	2 092 063
24	L-Phe	8	1 199 801	3-ketoacyl-CoA synthase 4	floral note wood resin	Tc08v2_g002200	3	1121979	1520555	1 148 435
25	L-Phe	8	2 170 173	GDSL esterase/lipase EXL3	cinnamaldehyde (R)	Tc08v2_g004050	6	2021946	2268116	2 251 806
26	L-Phe	8	6 559 785	Acetyltransferase At1g77540	acetophenone (UR) and benzyl acetate (UR)	Tc08v2_g010720	26	6533242	6978549	6 751 843
26	L-Phe	8	6 570 129	Caffeic acid 3-O-methyltransferase	acetophenone (UR) and benzyl acetate (UR)	Tc08v2_g010750	26	6533242	6978549	6 751 843
26	L-Phe	8	6 581 002	Caffeic acid 3-O-methyltransferase	acetophenone (UR) and benzyl acetate (UR)	Tc08v2_g010770	26	6533242	6978549	6 751 843
27	L-Phe	8	15 370 133	Putative O-acyltransferase WSD1	benzaldehyde (R), benzyl acetate (UR), cinnamaldehyde (R) and orange blossom note	Tc08v2_g014460	37	14 444 953	15 439 624	14 498 544
27	L-Phe	8	15 402 378	Putative O-acyltransferase WSD1	benzaldehyde (R), benzyl acetate (UR), cinnamaldehyde (R) and orange blossom note	Tc08v2_g014480	37	14 444 953	15 439 624	14 498 544
28	L-Phe	8	18 679 641	Putative GDSL esterase/lipase At1g29670	benzyl acetate (UR)	Tc08v2_g016570	42	17 816 898	19 249 315	19 249 315
29	L-Phe	9	5 605 457	GDSL esterase/lipase EXL3%2C putative	benzyl alcohol (UR) and the floral note green vegetative	Tc09v2_g009210	20	5327028	6165415	6 010 658
29	L-Phe	9	6 069 175	3-hydroxyisobutyryl-CoA hydrolase-like protein 3%2C mitochondrial	benzyl alcohol (UR) and the floral note green vegetative	Tc09v2_g009840	20	5327028	6165415	6 010 658
30	L-Phe	9	23 325 443	Feruloyl CoA ortho-hydroxylase 2	acetophenone (R), benzaldehyde (R) and benzyl acetate (UR)	Tc09v2_g017560	33	23 101 222	23 892 356	23 302 911
31	L-Phe	10	5 303 984	Putative 4-coumarate--CoA ligase-like 5	1-phenylethyl acetate (R), benzyl acetate (R), phenylethyl acetate co-eluted with 2-ethylphenol (R), to acetophenone (R), benzaldehyde (R) and cinnamaldehyde (R)	Tc10v2_g007330	26	5153882	5419006	5 308 832
Close	L-Phe	1	458 082	Putative GDSL esterase/lipase At5g33370	1-phenylethyl acetate and acetophenone	Tc01v2_g000810	NA	NA	NA
Close	L-Phe	1	638 387	GDSL esterase/lipase EXL3	1-phenylethyl acetate and acetophenone	Tc01v2_g001190	NA	NA	NA
Close	L-Phe	1	7 873 198	Putative Lipase-like PAD4	1-phenylethyl acetate and acetophenone	Tc01v2_g011820	NA	NA	NA
Close	L-Phe	1	7 881 871	Putative Lipase-like PAD4	1-phenylethyl acetate and acetophenone	Tc01v2_g011830	NA	NA	NA
Close	L-Phe	2	6 747 113	Putative Acetyl-CoA-benzylalcohol acetyltransferase	benzyl acetate and benzyl alcohol	Tc02v2_g010970	NA	NA	NA
Close	L-Phe	2	7 247 119	GDSL esterase/lipase 2	benzyl acetate and benzyl alcohol	Tc02v2_g011610	NA	NA	NA
Close	L-Phe	2	7 249 718	GDSL esterase/lipase 1	benzyl acetate and benzyl alcohol	Tc02v2_g011620	NA	NA	NA
Close	L-Phe	2	7 258 329	GDSL esterase/lipase 1	benzyl acetate and benzyl alcohol	Tc02v2_g011630	NA	NA	NA
Close	L-Phe	2	7 272 510	GDSL esterase/lipase 5	benzyl acetate and benzyl alcohol	Tc02v2_g011650	NA	NA	NA
Close	L-Phe	2	7 276 171	GDSL esterase/lipase 2	benzyl acetate and benzyl alcohol	Tc02v2_g011660	NA	NA	NA
Close	L-Phe	6	18 516 771	GDSL esterase/lipase APG	1-phenylethyl acetate and acetophenone	Tc06v2_g008410	NA	NA	NA
Close	L-Phe	7	4 088 218	2-nonaprenyl-3-methyl-6-methoxy-1%2C4-benzoquinol hydroxylase	4-hydroxy acetophenone and acetophenone	Tc07v2_g005850	NA	NA	NA
Close	L-Phe	7	4 090 014	2-nonaprenyl-3-methyl-6-methoxy-1%2C4-benzoquinol hydroxylase	4-hydroxy acetophenone and acetophenone	Tc07v2_g005860	NA	NA	NA
Close	L-Phe	7	4 093 759	2-nonaprenyl-3-methyl-6-methoxy-1%2C4-benzoquinol hydroxylase	4-hydroxy acetophenone and acetophenone	Tc07v2_g005880	NA	NA	NA
Close	L-Phe	9	3 591 826	Putative GDSL esterase/lipase 5	1-phenylethyl acetate and acetophenone	Tc09v2_g006150	NA	NA	NA
Close	L-Phe	9	36 175 947	Abscisic acid 8'-hydroxylase 2	4-hydroxy acetophenone and acetophenone	Tc09v2_g026720	NA	NA	NA
Close	L-Phe	10	884 814	GDSL esterase/lipase CPRD49	1-phenylethyl acetate and acetophenone	Tc10v2_g001510	NA	NA	NA
